# Supplementary material for: Identification of links between small molecules and miRNAs in human cancers based on transcriptional responses
Source: PubMed Central journal article supplement — Sci Rep. 2012 Feb 21;2:282. doi: 10.1038/srep00282 (PMC3282946; doi:10.1038/srep00282), 2012-02-21
Supplement: srep00282-s1.pdf [file srep00282-s1.pdf]

# Identification of links between small molecules and miRNAs in human cancers based on transcriptional responses

Wei Jiang<sup>1†</sup>, Xiaowen Chen<sup>1†</sup>, Mingzhi Liao<sup>1,2†</sup>, Wei Li<sup>1</sup>, Baofeng Lian<sup>1</sup>, Lihong Wang<sup>3</sup>, Fanlin Meng<sup>1</sup>, Xinyi Liu<sup>1</sup>, Xiujie Chen<sup>1</sup>, Yan Jin<sup>4</sup>, Xia Li<sup>1\*</sup>

\*Corresponding author. Xia Li, E-mail: lixia@hrbmu.edu.cn

† These authors contributed equally to this work.

## Supplementary information

**Table S1.** All miRNA modules.

**Table S2.** All miRNA pairs in the miRNA modules and their properties.

**Table S3.** All small molecule modules.

**Table S4.** All small molecule pairs in the small molecule modules and their properties.

**Table S1.** All miRNA modules.

| Cancer      | Module                | Degree | Property |
|-------------|-----------------------|--------|----------|
| Bone Marrow | gentamicin            | 7      | 1        |
| Bone Marrow | MS-275                | 7      | 1        |
| Bone Marrow | cefalexin             | 6      | 1        |
| Bone Marrow | bufexamac             | 5      | 1        |
| Bone Marrow | bepriidil             | 5      | 1        |
| Bone Marrow | tanespimycin          | 16     | 1        |
| Bone Marrow | trichostatin A        | 42     | 1        |
| Bone Marrow | sulconazole           | 14     | 1        |
| Bone Marrow | metronidazole         | 7      | 1        |
| Bone Marrow | doxorubicin           | 7      | 1        |
| Bone Marrow | 8-azaguanine          | 16     | 1        |
| Bone Marrow | rimexolone            | 12     | 1        |
| Bone Marrow | phthalylsulfathiazole | 9      | 1        |
| Bone Marrow | finasteride           | 6      | 1        |
| Bone Marrow | clemizole             | 6      | 1        |
| Bone Marrow | felbinac              | 16     | 1        |
| Bone Marrow | thiamphenicol         | 13     | 1        |
| Bone Marrow | adiphenine            | 20     | 1        |
| Bone Marrow | Prestwick-983         | 10     | 1        |
| Bone Marrow | medrysone             | 10     | 1        |
| Bone Marrow | DL-thiorphan          | 10     | 1        |
| Bone Marrow | alpha-estradiol       | 10     | 1        |
| Bone Marrow | trimethobenzamide     | 5      | 1        |
| Bone Marrow | piperidolate          | 5      | 1        |
| Bone Marrow | penbutolol            | 5      | 1        |
| Bone Marrow | imipenem              | 5      | 1        |
| Bone Marrow | trazodone             | 7      | 1        |
| Bone Marrow | estradiol             | 7      | 1        |
| Bone Marrow | lisuride              | 9      | 1        |
| Bone Marrow | fludrocortisone       | 9      | 1        |
| Bone Marrow | meticrane             | 15     | 1        |
| Bone Marrow | viomycin              | 10     | 1        |
| Bone Marrow | thioguanosine         | 10     | 1        |
| Bone Marrow | ebselen               | 10     | 1        |
| Bone Marrow | amiodarone            | 10     | 1        |
| Bone Marrow | sanguinarine          | 8      | 1        |
| Bone Marrow | roxithromycin         | 8      | 1        |
| Bone Marrow | Prestwick-692         | 8      | 1        |
| Bone Marrow | isoflupredone         | 8      | 1        |
| Bone Marrow | apigenin              | 11     | 1        |
| Bone Marrow | tyloxapol             | 12     | 1        |

|               |                      |    |   |
|---------------|----------------------|----|---|
| Bone Marrow   | verteporfin          | 10 | 1 |
| Bone Marrow   | alsterpaullone       | 10 | 1 |
| Bone Marrow   | triflusal            | 5  | 1 |
| Bone Marrow   | timolol              | 5  | 1 |
| Bone Marrow   | sulfadimethoxine     | 5  | 1 |
| Bone Marrow   | skimmianine          | 5  | 1 |
| Bone Marrow   | metamizole sodium    | 5  | 1 |
| Bone Marrow   | GW-8510              | 5  | 1 |
| Bone Marrow   | etamsylate           | 5  | 1 |
| Bone Marrow   | cantharidin          | 5  | 1 |
| Bone Marrow   | acetylsalicylic acid | 5  | 1 |
| Bone Marrow   | 3-acetamidocoumarin  | 8  | 1 |
| Bone Marrow   | thiostrepton         | 6  | 1 |
| Bone Marrow   | thioperamide         | 6  | 1 |
| Bone Marrow   | gliclazide           | 6  | 1 |
| Bone Marrow   | chlorogenic acid     | 6  | 1 |
| Bone Marrow   | norcyclobenzaprine   | 7  | 1 |
| Bone Marrow   | hexestrol            | 7  | 1 |
| Bone Marrow   | etiocholanolone      | 7  | 1 |
| Bone Marrow   | cetirizine           | 7  | 1 |
| Bone Marrow   | 5186223              | 7  | 1 |
| Bone Marrow   | heptaminol           | 11 | 1 |
| Bone Marrow   | omeprazole           | 8  | 1 |
| Bone Marrow   | nadolol              | 10 | 1 |
| Esophagus     | trichostatin A       | 7  | 1 |
| Gastric       | trichostatin A       | 21 | 1 |
| Germ Cell     | geldanamycin         | 5  | 1 |
| Germ Cell     | trichostatin A       | 87 | 1 |
| Germ Cell     | tanespimycin         | 12 | 1 |
| Germ Cell     | LY-294002            | 22 | 1 |
| Germ Cell     | thioridazine         | 21 | 1 |
| Germ Cell     | vorinostat           | 9  | 1 |
| Germ Cell     | 5224221              | 6  | 1 |
| Head and Neck | trichostatin A       | 12 | 1 |
| Leukemia      | trichostatin A       | 43 | 1 |
| Leukemia      | LY-294002            | 9  | 1 |
| Liver         | trichostatin A       | 34 | 1 |
| Liver         | vorinostat           | 7  | 1 |
| Pancreas      | trichostatin A       | 12 | 1 |
| Skin          | trichostatin A       | 8  | 1 |
| Thyroid       | trichostatin A       | 30 | 1 |
| Thyroid       | alpha-estradiol      | 7  | 1 |
| Tongue        | trichostatin A       | 55 | 1 |
| Tongue        | adiphenine           | 6  | 1 |

|             |                  |    |         |
|-------------|------------------|----|---------|
| Tongue      | sirolimus        | 7  | 1       |
| Uterus      | trichostatin A   | 40 | 1       |
| Bone Marrow | vorinostat       | 10 | 0       |
| Bone Marrow | midodrine        | 6  | 0       |
| Bone Marrow | diphenhydramine  | 6  | 0       |
| Bone Marrow | trioxysalen      | 5  | 0       |
| Bone Marrow | phenoxybenzamine | 5  | 0       |
| Bone Marrow | genistein        | 5  | 0       |
| Leukemia    | vorinostat       | 6  | 0       |
| Testis      | trichostatin A   | 10 | 0       |
| Tongue      | LY-294002        | 5  | 0       |
|             |                  |    | 0.90625 |

---

**Table S2.** All miRNA pairs in the miRNA modules and their properties.

| Cancer      | Module               | miRNA 1         | miRNA 2         | miRNA family | Common target gene | Functional similarity |
|-------------|----------------------|-----------------|-----------------|--------------|--------------------|-----------------------|
| Bone Marrow | 5186223              | hsa-miR-548n    | hsa-miR-570     | 1            | 0.00000            | 0.00000               |
| Bone Marrow | 0175029-0000         | hsa-miR-520g    | hsa-miR-520h    | 1            | 0.94186            | 0.90054               |
| Bone Marrow | 3-acetamidocoumarin  | hsa-miR-548d-5p | hsa-miR-548n    | 1            | 0.00000            | 0.00000               |
| Bone Marrow | 3-acetamidocoumarin  | hsa-miR-548d-5p | hsa-miR-570     | 1            | 0.00000            | 0.00000               |
| Bone Marrow | 3-acetamidocoumarin  | hsa-miR-548n    | hsa-miR-570     | 1            | 0.00000            | 0.00000               |
| Bone Marrow | 8-azaguanine         | hsa-miR-106b    | hsa-miR-20a     | 1            | 0.84795            | 0.92378               |
| Bone Marrow | 8-azaguanine         | hsa-miR-106b    | hsa-miR-20b     | 1            | 0.81871            | 0.91713               |
| Bone Marrow | 8-azaguanine         | hsa-miR-106b    | hsa-miR-519d    | 0            | 0.76351            | 0.92580               |
| Bone Marrow | 8-azaguanine         | hsa-miR-20a     | hsa-miR-20b     | 1            | 0.85792            | 0.94068               |
| Bone Marrow | 8-azaguanine         | hsa-miR-20a     | hsa-miR-519d    | 0            | 0.78041            | 0.92772               |
| Bone Marrow | 8-azaguanine         | hsa-miR-20b     | hsa-miR-519d    | 0            | 0.78716            | 0.93208               |
| Bone Marrow | 8-azaguanine         | hsa-miR-302b    | hsa-miR-302d    | 1            | 0.77291            | 0.92288               |
| Bone Marrow | 8-azaguanine         | hsa-miR-302b    | hsa-miR-520b    | 0            | 0.64957            | 0.00000               |
| Bone Marrow | 8-azaguanine         | hsa-miR-302b    | hsa-miR-373     | 0            | 0.66534            | 0.00000               |
| Bone Marrow | 8-azaguanine         | hsa-miR-302d    | hsa-miR-372     | 0            | 0.61111            | 0.00000               |
| Bone Marrow | 8-azaguanine         | hsa-miR-302d    | hsa-miR-520b    | 0            | 0.67521            | 0.00000               |
| Bone Marrow | 8-azaguanine         | hsa-miR-302d    | hsa-miR-373     | 0            | 0.69841            | 0.00000               |
| Bone Marrow | 8-azaguanine         | hsa-miR-372     | hsa-miR-520b    | 0            | 0.63248            | 0.90042               |
| Bone Marrow | 8-azaguanine         | hsa-miR-372     | hsa-miR-373     | 0            | 0.73152            | 0.00000               |
| Bone Marrow | 8-azaguanine         | hsa-miR-373     | hsa-miR-520b    | 0            | 0.77350            | 0.00000               |
| Bone Marrow | 8-azaguanine         | hsa-miR-519d    | hsa-miR-520b    | 1            | 0.00000            | 0.00000               |
| Bone Marrow | 8-azaguanine         | hsa-miR-519d    | hsa-miR-520g    | 1            | 0.00000            | 0.00000               |
| Bone Marrow | 8-azaguanine         | hsa-miR-519d    | hsa-miR-520h    | 1            | 0.00000            | 0.00000               |
| Bone Marrow | 8-azaguanine         | hsa-miR-520b    | hsa-miR-520g    | 1            | 0.00000            | 0.00000               |
| Bone Marrow | 8-azaguanine         | hsa-miR-520b    | hsa-miR-520h    | 1            | 0.00000            | 0.00000               |
| Bone Marrow | 8-azaguanine         | hsa-miR-520g    | hsa-miR-520h    | 1            | 0.94186            | 0.90054               |
| Bone Marrow | acetylsalicylic acid | hsa-miR-181a    | hsa-miR-181c    | 1            | 0.84758            | 0.94367               |
| Bone Marrow | aciclovir            | hsa-miR-26a     | hsa-miR-26b     | 1            | 0.85238            | 0.91124               |
| Bone Marrow | adiphenine           | hsa-miR-302b    | hsa-miR-302d    | 1            | 0.77291            | 0.92288               |
| Bone Marrow | adiphenine           | hsa-miR-302b    | hsa-miR-520b    | 0            | 0.64957            | 0.00000               |
| Bone Marrow | adiphenine           | hsa-miR-302b    | hsa-miR-520a-3p | 0            | 0.82051            | 0.00000               |
| Bone Marrow | adiphenine           | hsa-miR-302d    | hsa-miR-372     | 0            | 0.61111            | 0.00000               |
| Bone Marrow | adiphenine           | hsa-miR-302d    | hsa-miR-520b    | 0            | 0.67521            | 0.00000               |
| Bone Marrow | adiphenine           | hsa-miR-302d    | hsa-miR-520a-3p | 0            | 0.86538            | 0.00000               |
| Bone Marrow | adiphenine           | hsa-miR-372     | hsa-miR-520b    | 0            | 0.63248            | 0.90042               |
| Bone Marrow | adiphenine           | hsa-miR-372     | hsa-miR-520a-3p | 0            | 0.81410            | 0.00000               |
| Bone Marrow | adiphenine           | hsa-miR-520a-3p | hsa-miR-520b    | 1            | 0.89744            | 0.92174               |
| Bone Marrow | adiphenine           | hsa-miR-520a-3p | hsa-miR-520g    | 1            | 0.00000            | 0.00000               |
| Bone Marrow | adiphenine           | hsa-miR-520a-3p | hsa-miR-520h    | 1            | 0.00000            | 0.00000               |
| Bone Marrow | adiphenine           | hsa-miR-520b    | hsa-miR-520g    | 1            | 0.00000            | 0.00000               |

|             |                  |                 |                 |   |         |         |
|-------------|------------------|-----------------|-----------------|---|---------|---------|
| Bone Marrow | adiphenine       | hsa-miR-520b    | hsa-miR-520h    | 1 | 0.00000 | 0.00000 |
| Bone Marrow | adiphenine       | hsa-miR-520g    | hsa-miR-520h    | 1 | 0.94186 | 0.90054 |
| Bone Marrow | adiphenine       | hsa-miR-548a-5p | hsa-miR-548b-3p | 1 | 0.00000 | 0.00000 |
| Bone Marrow | adiphenine       | hsa-miR-548a-5p | hsa-miR-548d-3p | 1 | 0.00000 | 0.00000 |
| Bone Marrow | adiphenine       | hsa-miR-548a-5p | hsa-miR-548d-5p | 1 | 0.83436 | 0.93251 |
| Bone Marrow | adiphenine       | hsa-miR-548a-5p | hsa-miR-570     | 1 | 0.00000 | 0.00000 |
| Bone Marrow | adiphenine       | hsa-miR-548b-3p | hsa-miR-548d-3p | 1 | 0.00000 | 0.00000 |
| Bone Marrow | adiphenine       | hsa-miR-548b-3p | hsa-miR-548d-5p | 1 | 0.00000 | 0.00000 |
| Bone Marrow | adiphenine       | hsa-miR-548b-3p | hsa-miR-570     | 1 | 0.00000 | 0.00000 |
| Bone Marrow | adiphenine       | hsa-miR-548d-3p | hsa-miR-548d-5p | 1 | 0.00000 | 0.00000 |
| Bone Marrow | adiphenine       | hsa-miR-548d-3p | hsa-miR-570     | 1 | 0.00000 | 0.00000 |
| Bone Marrow | adiphenine       | hsa-miR-548d-5p | hsa-miR-570     | 1 | 0.00000 | 0.00000 |
| Bone Marrow | alpha-estradiol  | hsa-miR-181a    | hsa-miR-181c    | 1 | 0.84758 | 0.94367 |
| Bone Marrow | alpha-estradiol  | hsa-miR-23a     | hsa-miR-23b     | 1 | 0.93023 | 0.95828 |
| Bone Marrow | alpha-estradiol  | hsa-miR-302b    | hsa-miR-520b    | 0 | 0.64957 | 0.00000 |
| Bone Marrow | alsterpauillone  | hsa-miR-20a     | hsa-miR-20b     | 1 | 0.85792 | 0.94068 |
| Bone Marrow | alsterpauillone  | hsa-miR-302b    | hsa-miR-302d    | 1 | 0.77291 | 0.92288 |
| Bone Marrow | amiodarone       | hsa-miR-302b    | hsa-miR-302d    | 1 | 0.77291 | 0.92288 |
| Bone Marrow | amiodarone       | hsa-miR-302b    | hsa-miR-520b    | 0 | 0.64957 | 0.00000 |
| Bone Marrow | amiodarone       | hsa-miR-302d    | hsa-miR-520b    | 0 | 0.67521 | 0.00000 |
| Bone Marrow | amiodarone       | hsa-miR-520b    | hsa-miR-520g    | 1 | 0.00000 | 0.00000 |
| Bone Marrow | amiodarone       | hsa-miR-520b    | hsa-miR-520h    | 1 | 0.00000 | 0.00000 |
| Bone Marrow | amiodarone       | hsa-miR-520g    | hsa-miR-520h    | 1 | 0.94186 | 0.90054 |
| Bone Marrow | apigenin         | hsa-miR-302a    | hsa-miR-302b    | 1 | 0.85259 | 0.95381 |
| Bone Marrow | apigenin         | hsa-miR-302a    | hsa-miR-520b    | 0 | 0.68803 | 0.00000 |
| Bone Marrow | apigenin         | hsa-miR-302b    | hsa-miR-520b    | 0 | 0.64957 | 0.00000 |
| Bone Marrow | apigenin         | hsa-miR-520b    | hsa-miR-520g    | 1 | 0.00000 | 0.00000 |
| Bone Marrow | apigenin         | hsa-miR-520b    | hsa-miR-520h    | 1 | 0.00000 | 0.00000 |
| Bone Marrow | apigenin         | hsa-miR-520g    | hsa-miR-520h    | 1 | 0.94186 | 0.90054 |
| Bone Marrow | benzathine       |                 |                 |   |         |         |
| Bone Marrow | benzylpenicillin | hsa-miR-520g    | hsa-miR-520h    | 1 | 0.94186 | 0.90054 |
| Bone Marrow | bepidil          | hsa-miR-302b    | hsa-miR-302d    | 1 | 0.77291 | 0.92288 |
| Bone Marrow | bepidil          | hsa-miR-302b    | hsa-miR-520b    | 0 | 0.64957 | 0.00000 |
| Bone Marrow | bepidil          | hsa-miR-302d    | hsa-miR-372     | 0 | 0.61111 | 0.00000 |
| Bone Marrow | bepidil          | hsa-miR-302d    | hsa-miR-520b    | 0 | 0.67521 | 0.00000 |
| Bone Marrow | bepidil          | hsa-miR-372     | hsa-miR-520b    | 0 | 0.63248 | 0.90042 |
| Bone Marrow | biperiden        | hsa-miR-302b    | hsa-miR-302d    | 1 | 0.77291 | 0.92288 |
| Bone Marrow | bisacodyl        | hsa-miR-520g    | hsa-miR-520h    | 1 | 0.94186 | 0.90054 |
| Bone Marrow | bufexamac        | hsa-miR-181a    | hsa-miR-181c    | 1 | 0.84758 | 0.94367 |
| Bone Marrow | bufexamac        | hsa-miR-548b-3p | hsa-miR-548d-3p | 1 | 0.00000 | 0.00000 |
| Bone Marrow | cantharidin      | hsa-miR-548a-5p | hsa-miR-548n    | 1 | 0.00000 | 0.00000 |
| Bone Marrow | cefalexin        | hsa-miR-302a    | hsa-miR-302b    | 1 | 0.85259 | 0.95381 |
| Bone Marrow | cefalexin        | hsa-miR-302a    | hsa-miR-302d    | 1 | 0.80952 | 0.93156 |
| Bone Marrow | cefalexin        | hsa-miR-302a    | hsa-miR-520b    | 0 | 0.68803 | 0.00000 |

|             |                                   |                 |                 |   |         |         |
|-------------|-----------------------------------|-----------------|-----------------|---|---------|---------|
| Bone Marrow | cefalexin                         | hsa-miR-302a    | hsa-miR-520a-3p | 0 | 0.85897 | 0.00000 |
| Bone Marrow | cefalexin                         | hsa-miR-302b    | hsa-miR-302d    | 1 | 0.77291 | 0.92288 |
| Bone Marrow | cefalexin                         | hsa-miR-302b    | hsa-miR-520b    | 0 | 0.64957 | 0.00000 |
| Bone Marrow | cefalexin                         | hsa-miR-302b    | hsa-miR-520a-3p | 0 | 0.82051 | 0.00000 |
| Bone Marrow | cefalexin                         | hsa-miR-302d    | hsa-miR-520b    | 0 | 0.67521 | 0.00000 |
| Bone Marrow | cefalexin                         | hsa-miR-302d    | hsa-miR-520a-3p | 0 | 0.86538 | 0.00000 |
| Bone Marrow | cefalexin                         | hsa-miR-520a-3p | hsa-miR-520b    | 1 | 0.89744 | 0.92174 |
| Bone Marrow | cetirizine                        | hsa-miR-548b-3p | hsa-miR-548n    | 1 | 0.00000 | 0.00000 |
| Bone Marrow | chenodeoxycholic acid             | hsa-miR-302b    | hsa-miR-302d    | 1 | 0.77291 | 0.92288 |
| Bone Marrow | chlorogenic acid                  | hsa-miR-548a-5p | hsa-miR-548d-5p | 1 | 0.83436 | 0.93251 |
| Bone Marrow | clemizole                         | hsa-miR-181a    | hsa-miR-181c    | 1 | 0.84758 | 0.94367 |
| Bone Marrow | clemizole                         | hsa-miR-520g    | hsa-miR-520h    | 1 | 0.94186 | 0.90054 |
| Bone Marrow | clioquinol                        | hsa-miR-302b    | hsa-miR-302d    | 1 | 0.77291 | 0.92288 |
| Bone Marrow | clomipramine                      | hsa-miR-548a-5p | hsa-miR-548d-5p | 1 | 0.83436 | 0.93251 |
| Bone Marrow | cyclic adenosine<br>monophosphate | hsa-miR-26a     | hsa-miR-26b     | 1 | 0.85238 | 0.91124 |
| Bone Marrow | dacarbazine                       | hsa-miR-548a-5p | hsa-miR-548n    | 1 | 0.00000 | 0.00000 |
| Bone Marrow | dapsone                           | hsa-miR-520g    | hsa-miR-520h    | 1 | 0.94186 | 0.90054 |
| Bone Marrow | DL-thiorphan                      | hsa-miR-181a    | hsa-miR-181c    | 1 | 0.84758 | 0.94367 |
| Bone Marrow | DL-thiorphan                      | hsa-miR-302b    | hsa-miR-302d    | 1 | 0.77291 | 0.92288 |
| Bone Marrow | DL-thiorphan                      | hsa-miR-548b-3p | hsa-miR-548d-3p | 1 | 0.00000 | 0.00000 |
| Bone Marrow | doxazosin                         | hsa-miR-520g    | hsa-miR-520h    | 1 | 0.94186 | 0.90054 |
| Bone Marrow | doxorubicin                       | hsa-miR-302b    | hsa-miR-302d    | 1 | 0.77291 | 0.92288 |
| Bone Marrow | doxorubicin                       | hsa-miR-302b    | hsa-miR-520b    | 0 | 0.64957 | 0.00000 |
| Bone Marrow | doxorubicin                       | hsa-miR-302d    | hsa-miR-520b    | 0 | 0.67521 | 0.00000 |
| Bone Marrow | doxorubicin                       | hsa-miR-520b    | hsa-miR-520g    | 1 | 0.00000 | 0.00000 |
| Bone Marrow | doxorubicin                       | hsa-miR-520b    | hsa-miR-520h    | 1 | 0.00000 | 0.00000 |
| Bone Marrow | doxorubicin                       | hsa-miR-520g    | hsa-miR-520h    | 1 | 0.94186 | 0.90054 |
| Bone Marrow | ebesen                            | hsa-miR-520g    | hsa-miR-520h    | 1 | 0.94186 | 0.90054 |
| Bone Marrow | ebesen                            | hsa-miR-548d-3p | hsa-miR-548d-5p | 1 | 0.00000 | 0.00000 |
| Bone Marrow | ebesen                            | hsa-miR-548d-3p | hsa-miR-548n    | 1 | 0.00000 | 0.00000 |
| Bone Marrow | ebesen                            | hsa-miR-548d-5p | hsa-miR-548n    | 1 | 0.00000 | 0.00000 |
| Bone Marrow | estradiol                         | hsa-miR-302d    | hsa-miR-520a-3p | 0 | 0.86538 | 0.00000 |
| Bone Marrow | estradiol                         | hsa-miR-520a-3p | hsa-miR-520g    | 1 | 0.00000 | 0.00000 |
| Bone Marrow | estradiol                         | hsa-miR-520a-3p | hsa-miR-520h    | 1 | 0.00000 | 0.00000 |
| Bone Marrow | estradiol                         | hsa-miR-520g    | hsa-miR-520h    | 1 | 0.94186 | 0.90054 |
| Bone Marrow | etamsylate                        | hsa-miR-520g    | hsa-miR-520h    | 1 | 0.94186 | 0.90054 |
| Bone Marrow | etiocholanolone                   | hsa-miR-302a    | hsa-miR-302b    | 1 | 0.85259 | 0.95381 |
| Bone Marrow | felbinac                          | hsa-miR-106b    | hsa-miR-20a     | 1 | 0.84795 | 0.92378 |
| Bone Marrow | felbinac                          | hsa-miR-106b    | hsa-miR-20b     | 1 | 0.81871 | 0.91713 |
| Bone Marrow | felbinac                          | hsa-miR-106b    | hsa-miR-520a-3p | 0 | 0.60256 | 0.00000 |
| Bone Marrow | felbinac                          | hsa-miR-20a     | hsa-miR-20b     | 1 | 0.85792 | 0.94068 |
| Bone Marrow | felbinac                          | hsa-miR-23a     | hsa-miR-23b     | 1 | 0.93023 | 0.95828 |
| Bone Marrow | felbinac                          | hsa-miR-302a    | hsa-miR-302b    | 1 | 0.85259 | 0.95381 |

|             |                 |                 |                 |   |         |         |
|-------------|-----------------|-----------------|-----------------|---|---------|---------|
| Bone Marrow | felbinac        | hsa-miR-302a    | hsa-miR-302d    | 1 | 0.80952 | 0.93156 |
| Bone Marrow | felbinac        | hsa-miR-302a    | hsa-miR-520a-3p | 0 | 0.85897 | 0.00000 |
| Bone Marrow | felbinac        | hsa-miR-302b    | hsa-miR-302d    | 1 | 0.77291 | 0.92288 |
| Bone Marrow | felbinac        | hsa-miR-302b    | hsa-miR-520a-3p | 0 | 0.82051 | 0.00000 |
| Bone Marrow | felbinac        | hsa-miR-302d    | hsa-miR-520a-3p | 0 | 0.86538 | 0.00000 |
| Bone Marrow | felbinac        | hsa-miR-520a-3p | hsa-miR-520h    | 1 | 0.00000 | 0.00000 |
| Bone Marrow | finasteride     | hsa-miR-520g    | hsa-miR-520h    | 1 | 0.94186 | 0.90054 |
| Bone Marrow | finasteride     | hsa-miR-548n    | hsa-miR-570     | 1 | 0.00000 | 0.00000 |
| Bone Marrow | fludrocortisone | hsa-miR-302b    | hsa-miR-302d    | 1 | 0.77291 | 0.92288 |
| Bone Marrow | fludrocortisone | hsa-miR-302b    | hsa-miR-520b    | 0 | 0.64957 | 0.00000 |
| Bone Marrow | fludrocortisone | hsa-miR-302d    | hsa-miR-520b    | 0 | 0.67521 | 0.00000 |
| Bone Marrow | fludrocortisone | hsa-miR-520b    | hsa-miR-520g    | 1 | 0.00000 | 0.00000 |
| Bone Marrow | fludrocortisone | hsa-miR-520b    | hsa-miR-520h    | 1 | 0.00000 | 0.00000 |
| Bone Marrow | fludrocortisone | hsa-miR-520g    | hsa-miR-520h    | 1 | 0.94186 | 0.90054 |
| Bone Marrow | gentamicin      | hsa-miR-302b    | hsa-miR-302d    | 1 | 0.77291 | 0.92288 |
| Bone Marrow | gentamicin      | hsa-miR-302b    | hsa-miR-373     | 0 | 0.66534 | 0.00000 |
| Bone Marrow | gentamicin      | hsa-miR-302b    | hsa-miR-520a-3p | 0 | 0.82051 | 0.00000 |
| Bone Marrow | gentamicin      | hsa-miR-302d    | hsa-miR-372     | 0 | 0.61111 | 0.00000 |
| Bone Marrow | gentamicin      | hsa-miR-302d    | hsa-miR-373     | 0 | 0.69841 | 0.00000 |
| Bone Marrow | gentamicin      | hsa-miR-302d    | hsa-miR-520a-3p | 0 | 0.86538 | 0.00000 |
| Bone Marrow | gentamicin      | hsa-miR-372     | hsa-miR-373     | 0 | 0.73152 | 0.00000 |
| Bone Marrow | gentamicin      | hsa-miR-372     | hsa-miR-520a-3p | 0 | 0.81410 | 0.00000 |
| Bone Marrow | gentamicin      | hsa-miR-373     | hsa-miR-520a-3p | 0 | 0.85256 | 0.00000 |
| Bone Marrow | gentamicin      | hsa-miR-520a-3p | hsa-miR-520g    | 1 | 0.00000 | 0.00000 |
| Bone Marrow | gentamicin      | hsa-miR-520a-3p | hsa-miR-520h    | 1 | 0.00000 | 0.00000 |
| Bone Marrow | gentamicin      | hsa-miR-520g    | hsa-miR-520h    | 1 | 0.94186 | 0.90054 |
| Bone Marrow | gliclazide      | hsa-miR-548d-5p | hsa-miR-570     | 1 | 0.00000 | 0.00000 |
| Bone Marrow | GW-8510         | hsa-miR-520g    | hsa-miR-520h    | 1 | 0.94186 | 0.90054 |
| Bone Marrow | H-7             | hsa-miR-520g    | hsa-miR-520h    | 1 | 0.94186 | 0.90054 |
| Bone Marrow | heptaminol      | hsa-miR-548b-3p | hsa-miR-548d-3p | 1 | 0.00000 | 0.00000 |
| Bone Marrow | heptaminol      | hsa-miR-548b-3p | hsa-miR-548n    | 1 | 0.00000 | 0.00000 |
| Bone Marrow | heptaminol      | hsa-miR-548d-3p | hsa-miR-548n    | 1 | 0.00000 | 0.00000 |
| Bone Marrow | hexestrol       | hsa-miR-302b    | hsa-miR-520b    | 0 | 0.64957 | 0.00000 |
| Bone Marrow | hexetidine      | hsa-miR-181a    | hsa-miR-181c    | 1 | 0.84758 | 0.94367 |
| Bone Marrow | imipenem        | hsa-miR-548a-5p | hsa-miR-548d-3p | 1 | 0.00000 | 0.00000 |
| Bone Marrow | imipenem        | hsa-miR-548a-5p | hsa-miR-548n    | 1 | 0.00000 | 0.00000 |
| Bone Marrow | imipenem        | hsa-miR-548d-3p | hsa-miR-548n    | 1 | 0.00000 | 0.00000 |
| Bone Marrow | isoflupredone   | hsa-miR-302b    | hsa-miR-520b    | 0 | 0.64957 | 0.00000 |
| Bone Marrow | isoflupredone   | hsa-miR-548n    | hsa-miR-570     | 1 | 0.00000 | 0.00000 |
| Bone Marrow | isoniazid       | hsa-miR-548b-3p | hsa-miR-570     | 1 | 0.00000 | 0.00000 |
| Bone Marrow | lisuride        | hsa-miR-302b    | hsa-miR-520b    | 0 | 0.64957 | 0.00000 |
| Bone Marrow | lisuride        | hsa-miR-302b    | hsa-miR-520a-3p | 0 | 0.82051 | 0.00000 |
| Bone Marrow | lisuride        | hsa-miR-520a-3p | hsa-miR-520b    | 1 | 0.89744 | 0.92174 |
| Bone Marrow | lisuride        | hsa-miR-520a-3p | hsa-miR-520g    | 1 | 0.00000 | 0.00000 |

|             |                    |                 |                 |   |         |         |
|-------------|--------------------|-----------------|-----------------|---|---------|---------|
| Bone Marrow | lisuride           | hsa-miR-520a-3p | hsa-miR-520h    | 1 | 0.00000 | 0.00000 |
| Bone Marrow | lisuride           | hsa-miR-520b    | hsa-miR-520g    | 1 | 0.00000 | 0.00000 |
| Bone Marrow | lisuride           | hsa-miR-520b    | hsa-miR-520h    | 1 | 0.00000 | 0.00000 |
| Bone Marrow | lisuride           | hsa-miR-520g    | hsa-miR-520h    | 1 | 0.94186 | 0.90054 |
| Bone Marrow | lycorine           | hsa-miR-548b-3p | hsa-miR-548d-3p | 1 | 0.00000 | 0.00000 |
| Bone Marrow | medrysone          | hsa-miR-302b    | hsa-miR-302d    | 1 | 0.77291 | 0.92288 |
| Bone Marrow | medrysone          | hsa-miR-520g    | hsa-miR-520h    | 1 | 0.94186 | 0.90054 |
| Bone Marrow | medrysone          | hsa-miR-548d-5p | hsa-miR-570     | 1 | 0.00000 | 0.00000 |
| Bone Marrow | metamizole sodium  | hsa-miR-548n    | hsa-miR-570     | 1 | 0.00000 | 0.00000 |
| Bone Marrow | methazolamide      | hsa-miR-548d-3p | hsa-miR-570     | 1 | 0.00000 | 0.00000 |
| Bone Marrow | meticrane          | hsa-miR-302b    | hsa-miR-302d    | 1 | 0.77291 | 0.92288 |
| Bone Marrow | meticrane          | hsa-miR-302b    | hsa-miR-520b    | 0 | 0.64957 | 0.00000 |
| Bone Marrow | meticrane          | hsa-miR-302b    | hsa-miR-373     | 0 | 0.66534 | 0.00000 |
| Bone Marrow | meticrane          | hsa-miR-302b    | hsa-miR-520a-3p | 0 | 0.82051 | 0.00000 |
| Bone Marrow | meticrane          | hsa-miR-302d    | hsa-miR-372     | 0 | 0.61111 | 0.00000 |
| Bone Marrow | meticrane          | hsa-miR-302d    | hsa-miR-520b    | 0 | 0.67521 | 0.00000 |
| Bone Marrow | meticrane          | hsa-miR-302d    | hsa-miR-373     | 0 | 0.69841 | 0.00000 |
| Bone Marrow | meticrane          | hsa-miR-302d    | hsa-miR-520a-3p | 0 | 0.86538 | 0.00000 |
| Bone Marrow | meticrane          | hsa-miR-372     | hsa-miR-520b    | 0 | 0.63248 | 0.90042 |
| Bone Marrow | meticrane          | hsa-miR-372     | hsa-miR-373     | 0 | 0.73152 | 0.00000 |
| Bone Marrow | meticrane          | hsa-miR-372     | hsa-miR-520a-3p | 0 | 0.81410 | 0.00000 |
| Bone Marrow | meticrane          | hsa-miR-373     | hsa-miR-520b    | 0 | 0.77350 | 0.00000 |
| Bone Marrow | meticrane          | hsa-miR-373     | hsa-miR-520a-3p | 0 | 0.85256 | 0.00000 |
| Bone Marrow | meticrane          | hsa-miR-520a-3p | hsa-miR-520b    | 1 | 0.89744 | 0.92174 |
| Bone Marrow | meticrane          | hsa-miR-520a-3p | hsa-miR-520g    | 1 | 0.00000 | 0.00000 |
| Bone Marrow | meticrane          | hsa-miR-520a-3p | hsa-miR-520h    | 1 | 0.00000 | 0.00000 |
| Bone Marrow | meticrane          | hsa-miR-520b    | hsa-miR-520g    | 1 | 0.00000 | 0.00000 |
| Bone Marrow | meticrane          | hsa-miR-520b    | hsa-miR-520h    | 1 | 0.00000 | 0.00000 |
| Bone Marrow | meticrane          | hsa-miR-520g    | hsa-miR-520h    | 1 | 0.94186 | 0.90054 |
| Bone Marrow | metronidazole      | hsa-miR-302b    | hsa-miR-302d    | 1 | 0.77291 | 0.92288 |
| Bone Marrow | metronidazole      | hsa-miR-302d    | hsa-miR-372     | 0 | 0.61111 | 0.00000 |
| Bone Marrow | metronidazole      | hsa-miR-548b-3p | hsa-miR-548d-5p | 1 | 0.00000 | 0.00000 |
| Bone Marrow | metryapone         | hsa-miR-302b    | hsa-miR-520a-3p | 0 | 0.82051 | 0.00000 |
| Bone Marrow | monensin           | hsa-miR-302b    | hsa-miR-373     | 0 | 0.66534 | 0.00000 |
| Bone Marrow | monensin           | hsa-miR-548d-5p | hsa-miR-570     | 1 | 0.00000 | 0.00000 |
| Bone Marrow | MS-275             | hsa-miR-17      | hsa-miR-519d    | 0 | 0.90355 | 0.94162 |
| Bone Marrow | MS-275             | hsa-miR-373     | hsa-miR-520a-3p | 0 | 0.85256 | 0.00000 |
| Bone Marrow | MS-275             | hsa-miR-519d    | hsa-miR-520a-3p | 1 | 0.00000 | 0.00000 |
| Bone Marrow | MS-275             | hsa-miR-548a-5p | hsa-miR-548d-5p | 1 | 0.83436 | 0.93251 |
| Bone Marrow | nadolol            | hsa-miR-520g    | hsa-miR-520h    | 1 | 0.94186 | 0.90054 |
| Bone Marrow | naringenin         | hsa-miR-302b    | hsa-miR-520b    | 0 | 0.64957 | 0.00000 |
| Bone Marrow | naringenin         | hsa-miR-302b    | hsa-miR-520a-3p | 0 | 0.82051 | 0.00000 |
| Bone Marrow | naringenin         | hsa-miR-520a-3p | hsa-miR-520b    | 1 | 0.89744 | 0.92174 |
| Bone Marrow | norcyclobenzaprine | hsa-miR-548b-3p | hsa-miR-548d-3p | 1 | 0.00000 | 0.00000 |

|             |                       |                 |                 |   |         |         |
|-------------|-----------------------|-----------------|-----------------|---|---------|---------|
| Bone Marrow | omeprazole            | hsa-miR-548b-3p | hsa-miR-570     | 1 | 0.00000 | 0.00000 |
| Bone Marrow | pargyline             | hsa-miR-302b    | hsa-miR-520b    | 0 | 0.64957 | 0.00000 |
| Bone Marrow | pargyline             | hsa-miR-548b-3p | hsa-miR-548d-3p | 1 | 0.00000 | 0.00000 |
| Bone Marrow | penbutolol            | hsa-miR-548d-5p | hsa-miR-548n    | 1 | 0.00000 | 0.00000 |
| Bone Marrow | penbutolol            | hsa-miR-548d-5p | hsa-miR-570     | 1 | 0.00000 | 0.00000 |
| Bone Marrow | penbutolol            | hsa-miR-548n    | hsa-miR-570     | 1 | 0.00000 | 0.00000 |
| Bone Marrow | phthalylsulfathiazole | hsa-miR-302b    | hsa-miR-302d    | 1 | 0.77291 | 0.92288 |
| Bone Marrow | phthalylsulfathiazole | hsa-miR-520g    | hsa-miR-520h    | 1 | 0.94186 | 0.90054 |
| Bone Marrow | phthalylsulfathiazole | hsa-miR-548n    | hsa-miR-570     | 1 | 0.00000 | 0.00000 |
| Bone Marrow | piperidolate          | hsa-miR-302b    | hsa-miR-302d    | 1 | 0.77291 | 0.92288 |
| Bone Marrow | piperidolate          | hsa-miR-302b    | hsa-miR-520b    | 0 | 0.64957 | 0.00000 |
| Bone Marrow | piperidolate          | hsa-miR-302d    | hsa-miR-520b    | 0 | 0.67521 | 0.00000 |
| Bone Marrow | Prestwick-1082        | hsa-miR-520g    | hsa-miR-520h    | 1 | 0.94186 | 0.90054 |
| Bone Marrow | Prestwick-692         | hsa-miR-181a    | hsa-miR-181c    | 1 | 0.84758 | 0.94367 |
| Bone Marrow | Prestwick-692         | hsa-miR-548d-5p | hsa-miR-570     | 1 | 0.00000 | 0.00000 |
| Bone Marrow | Prestwick-983         | hsa-miR-181a    | hsa-miR-181c    | 1 | 0.84758 | 0.94367 |
| Bone Marrow | Prestwick-983         | hsa-miR-302b    | hsa-miR-520a-3p | 0 | 0.82051 | 0.00000 |
| Bone Marrow | Prestwick-983         | hsa-miR-548d-3p | hsa-miR-570     | 1 | 0.00000 | 0.00000 |
| Bone Marrow | pyrazinamide          | hsa-miR-548b-3p | hsa-miR-570     | 1 | 0.00000 | 0.00000 |
| Bone Marrow | pyrithyldione         | hsa-miR-520b    | hsa-miR-520g    | 1 | 0.00000 | 0.00000 |
| Bone Marrow | quinpirole            | hsa-miR-548d-3p | hsa-miR-548d-5p | 1 | 0.00000 | 0.00000 |
| Bone Marrow | quinpirole            | hsa-miR-548d-3p | hsa-miR-548n    | 1 | 0.00000 | 0.00000 |
| Bone Marrow | quinpirole            | hsa-miR-548d-5p | hsa-miR-548n    | 1 | 0.00000 | 0.00000 |
| Bone Marrow | repaglinide           | hsa-miR-548b-3p | hsa-miR-570     | 1 | 0.00000 | 0.00000 |
| Bone Marrow | rimexolone            | hsa-miR-302b    | hsa-miR-520b    | 0 | 0.64957 | 0.00000 |
| Bone Marrow | rimexolone            | hsa-miR-302b    | hsa-miR-373     | 0 | 0.66534 | 0.00000 |
| Bone Marrow | rimexolone            | hsa-miR-372     | hsa-miR-520b    | 0 | 0.63248 | 0.90042 |
| Bone Marrow | rimexolone            | hsa-miR-372     | hsa-miR-373     | 0 | 0.73152 | 0.00000 |
| Bone Marrow | rimexolone            | hsa-miR-373     | hsa-miR-520b    | 0 | 0.77350 | 0.00000 |
| Bone Marrow | rimexolone            | hsa-miR-520b    | hsa-miR-520g    | 1 | 0.00000 | 0.00000 |
| Bone Marrow | rimexolone            | hsa-miR-520b    | hsa-miR-520h    | 1 | 0.00000 | 0.00000 |
| Bone Marrow | rimexolone            | hsa-miR-520g    | hsa-miR-520h    | 1 | 0.94186 | 0.90054 |
| Bone Marrow | rimexolone            | hsa-miR-548n    | hsa-miR-570     | 1 | 0.00000 | 0.00000 |
| Bone Marrow | ronidazole            | hsa-miR-302a    | hsa-miR-302b    | 1 | 0.85259 | 0.95381 |
| Bone Marrow | ronidazole            | hsa-miR-302a    | hsa-miR-302d    | 1 | 0.80952 | 0.93156 |
| Bone Marrow | ronidazole            | hsa-miR-302b    | hsa-miR-302d    | 1 | 0.77291 | 0.92288 |
| Bone Marrow | roxithromycin         | hsa-miR-520g    | hsa-miR-520h    | 1 | 0.94186 | 0.90054 |
| Bone Marrow | roxithromycin         | hsa-miR-548d-3p | hsa-miR-570     | 1 | 0.00000 | 0.00000 |
| Bone Marrow | sanguinarine          | hsa-miR-520g    | hsa-miR-520h    | 1 | 0.94186 | 0.90054 |
| Bone Marrow | sanguinarine          | hsa-miR-548a-5p | hsa-miR-548d-5p | 1 | 0.83436 | 0.93251 |
| Bone Marrow | scriptaid             | hsa-miR-548a-5p | hsa-miR-548d-5p | 1 | 0.83436 | 0.93251 |
| Bone Marrow | skimmiarine           | hsa-miR-302b    | hsa-miR-520a-3p | 0 | 0.82051 | 0.00000 |
| Bone Marrow | streptozocin          | hsa-miR-548b-3p | hsa-miR-570     | 1 | 0.00000 | 0.00000 |
| Bone Marrow | sulconazole           | hsa-miR-106a    | hsa-miR-106b    | 1 | 0.78363 | 0.91813 |

|             |                  |              |                 |   |         |         |
|-------------|------------------|--------------|-----------------|---|---------|---------|
| Bone Marrow | sulconazole      | hsa-miR-106a | hsa-miR-20a     | 1 | 0.83478 | 0.93376 |
| Bone Marrow | sulconazole      | hsa-miR-106a | hsa-miR-519d    | 0 | 0.76689 | 0.92704 |
| Bone Marrow | sulconazole      | hsa-miR-106b | hsa-miR-20a     | 1 | 0.84795 | 0.92378 |
| Bone Marrow | sulconazole      | hsa-miR-106b | hsa-miR-519d    | 0 | 0.76351 | 0.92580 |
| Bone Marrow | sulconazole      | hsa-miR-20a  | hsa-miR-519d    | 0 | 0.78041 | 0.92772 |
| Bone Marrow | sulconazole      | hsa-miR-302b | hsa-miR-302d    | 1 | 0.77291 | 0.92288 |
| Bone Marrow | sulconazole      | hsa-miR-302b | hsa-miR-520b    | 0 | 0.64957 | 0.00000 |
| Bone Marrow | sulconazole      | hsa-miR-302b | hsa-miR-373     | 0 | 0.66534 | 0.00000 |
| Bone Marrow | sulconazole      | hsa-miR-302d | hsa-miR-520b    | 0 | 0.67521 | 0.00000 |
| Bone Marrow | sulconazole      | hsa-miR-302d | hsa-miR-373     | 0 | 0.69841 | 0.00000 |
| Bone Marrow | sulconazole      | hsa-miR-373  | hsa-miR-520b    | 0 | 0.77350 | 0.00000 |
| Bone Marrow | sulconazole      | hsa-miR-519d | hsa-miR-520b    | 1 | 0.00000 | 0.00000 |
| Bone Marrow | sulconazole      | hsa-miR-519d | hsa-miR-520g    | 1 | 0.00000 | 0.00000 |
| Bone Marrow | sulconazole      | hsa-miR-519d | hsa-miR-520h    | 1 | 0.00000 | 0.00000 |
| Bone Marrow | sulconazole      | hsa-miR-520b | hsa-miR-520g    | 1 | 0.00000 | 0.00000 |
| Bone Marrow | sulconazole      | hsa-miR-520b | hsa-miR-520h    | 1 | 0.00000 | 0.00000 |
| Bone Marrow | sulconazole      | hsa-miR-520g | hsa-miR-520h    | 1 | 0.94186 | 0.90054 |
| Bone Marrow | sulfadimethoxine | hsa-miR-520g | hsa-miR-520h    | 1 | 0.94186 | 0.90054 |
| Bone Marrow | tanespimycin     | hsa-miR-106a | hsa-miR-106b    | 1 | 0.78363 | 0.91813 |
| Bone Marrow | tanespimycin     | hsa-miR-106a | hsa-miR-17      | 1 | 1.00000 | 0.92268 |
| Bone Marrow | tanespimycin     | hsa-miR-106a | hsa-miR-20a     | 1 | 0.83478 | 0.93376 |
| Bone Marrow | tanespimycin     | hsa-miR-106a | hsa-miR-20b     | 1 | 0.81449 | 0.93953 |
| Bone Marrow | tanespimycin     | hsa-miR-106a | hsa-miR-520a-3p | 0 | 0.62821 | 0.00000 |
| Bone Marrow | tanespimycin     | hsa-miR-106a | hsa-miR-519d    | 0 | 0.76689 | 0.92704 |
| Bone Marrow | tanespimycin     | hsa-miR-106b | hsa-miR-17      | 1 | 0.95939 | 0.92430 |
| Bone Marrow | tanespimycin     | hsa-miR-106b | hsa-miR-20a     | 1 | 0.84795 | 0.92378 |
| Bone Marrow | tanespimycin     | hsa-miR-106b | hsa-miR-20b     | 1 | 0.81871 | 0.91713 |
| Bone Marrow | tanespimycin     | hsa-miR-106b | hsa-miR-520a-3p | 0 | 0.60256 | 0.00000 |
| Bone Marrow | tanespimycin     | hsa-miR-106b | hsa-miR-519d    | 0 | 0.76351 | 0.92580 |
| Bone Marrow | tanespimycin     | hsa-miR-17   | hsa-miR-20a     | 1 | 0.99492 | 0.91839 |
| Bone Marrow | tanespimycin     | hsa-miR-17   | hsa-miR-20b     | 1 | 0.97970 | 0.92876 |
| Bone Marrow | tanespimycin     | hsa-miR-17   | hsa-miR-519d    | 0 | 0.90355 | 0.94162 |
| Bone Marrow | tanespimycin     | hsa-miR-20a  | hsa-miR-20b     | 1 | 0.85792 | 0.94068 |
| Bone Marrow | tanespimycin     | hsa-miR-20a  | hsa-miR-519d    | 0 | 0.78041 | 0.92772 |
| Bone Marrow | tanespimycin     | hsa-miR-20b  | hsa-miR-519d    | 0 | 0.78716 | 0.93208 |
| Bone Marrow | tanespimycin     | hsa-miR-302d | hsa-miR-372     | 0 | 0.61111 | 0.00000 |
| Bone Marrow | tanespimycin     | hsa-miR-302d | hsa-miR-520b    | 0 | 0.67521 | 0.00000 |
| Bone Marrow | tanespimycin     | hsa-miR-302d | hsa-miR-373     | 0 | 0.69841 | 0.00000 |
| Bone Marrow | tanespimycin     | hsa-miR-302d | hsa-miR-520a-3p | 0 | 0.86538 | 0.00000 |
| Bone Marrow | tanespimycin     | hsa-miR-372  | hsa-miR-520b    | 0 | 0.63248 | 0.90042 |
| Bone Marrow | tanespimycin     | hsa-miR-372  | hsa-miR-373     | 0 | 0.73152 | 0.00000 |
| Bone Marrow | tanespimycin     | hsa-miR-372  | hsa-miR-520a-3p | 0 | 0.81410 | 0.00000 |
| Bone Marrow | tanespimycin     | hsa-miR-373  | hsa-miR-520b    | 0 | 0.77350 | 0.00000 |
| Bone Marrow | tanespimycin     | hsa-miR-373  | hsa-miR-520a-3p | 0 | 0.85256 | 0.00000 |

|             |                |                 |                 |   |         |         |
|-------------|----------------|-----------------|-----------------|---|---------|---------|
| Bone Marrow | tanespimycin   | hsa-miR-519d    | hsa-miR-520a-3p | 1 | 0.00000 | 0.00000 |
| Bone Marrow | tanespimycin   | hsa-miR-519d    | hsa-miR-520b    | 1 | 0.00000 | 0.00000 |
| Bone Marrow | tanespimycin   | hsa-miR-519d    | hsa-miR-520g    | 1 | 0.00000 | 0.00000 |
| Bone Marrow | tanespimycin   | hsa-miR-520a-3p | hsa-miR-520b    | 1 | 0.89744 | 0.92174 |
| Bone Marrow | tanespimycin   | hsa-miR-520a-3p | hsa-miR-520g    | 1 | 0.00000 | 0.00000 |
| Bone Marrow | tanespimycin   | hsa-miR-520b    | hsa-miR-520g    | 1 | 0.00000 | 0.00000 |
| Bone Marrow | thiamphenicol  | hsa-miR-302b    | hsa-miR-302d    | 1 | 0.77291 | 0.92288 |
| Bone Marrow | thiamphenicol  | hsa-miR-302b    | hsa-miR-520b    | 0 | 0.64957 | 0.00000 |
| Bone Marrow | thiamphenicol  | hsa-miR-302d    | hsa-miR-520b    | 0 | 0.67521 | 0.00000 |
| Bone Marrow | thiamphenicol  | hsa-miR-520b    | hsa-miR-520g    | 1 | 0.00000 | 0.00000 |
| Bone Marrow | thiamphenicol  | hsa-miR-520b    | hsa-miR-520h    | 1 | 0.00000 | 0.00000 |
| Bone Marrow | thiamphenicol  | hsa-miR-520g    | hsa-miR-520h    | 1 | 0.94186 | 0.90054 |
| Bone Marrow | thiamphenicol  | hsa-miR-548d-3p | hsa-miR-548n    | 1 | 0.00000 | 0.00000 |
| Bone Marrow | thiamphenicol  | hsa-miR-548d-3p | hsa-miR-570     | 1 | 0.00000 | 0.00000 |
| Bone Marrow | thiamphenicol  | hsa-miR-548n    | hsa-miR-570     | 1 | 0.00000 | 0.00000 |
| Bone Marrow | thioguanosine  | hsa-miR-302b    | hsa-miR-302d    | 1 | 0.77291 | 0.92288 |
| Bone Marrow | thioguanosine  | hsa-miR-302d    | hsa-miR-372     | 0 | 0.61111 | 0.00000 |
| Bone Marrow | thioguanosine  | hsa-miR-520g    | hsa-miR-520h    | 1 | 0.94186 | 0.90054 |
| Bone Marrow | thiooperamide  | hsa-miR-520g    | hsa-miR-520h    | 1 | 0.94186 | 0.90054 |
| Bone Marrow | thiostrepton   | hsa-miR-520g    | hsa-miR-520h    | 1 | 0.94186 | 0.90054 |
| Bone Marrow | timolol        | hsa-miR-520g    | hsa-miR-520h    | 1 | 0.94186 | 0.90054 |
| Bone Marrow | trazodone      | hsa-miR-302b    | hsa-miR-520a-3p | 0 | 0.82051 | 0.00000 |
| Bone Marrow | trazodone      | hsa-miR-520a-3p | hsa-miR-520g    | 1 | 0.00000 | 0.00000 |
| Bone Marrow | trazodone      | hsa-miR-520a-3p | hsa-miR-520h    | 1 | 0.00000 | 0.00000 |
| Bone Marrow | trazodone      | hsa-miR-520g    | hsa-miR-520h    | 1 | 0.94186 | 0.90054 |
| Bone Marrow | trichostatin A | hsa-miR-106a    | hsa-miR-106b    | 1 | 0.78363 | 0.91813 |
| Bone Marrow | trichostatin A | hsa-miR-106a    | hsa-miR-17      | 1 | 1.00000 | 0.92268 |
| Bone Marrow | trichostatin A | hsa-miR-106a    | hsa-miR-20a     | 1 | 0.83478 | 0.93376 |
| Bone Marrow | trichostatin A | hsa-miR-106a    | hsa-miR-20b     | 1 | 0.81449 | 0.93953 |
| Bone Marrow | trichostatin A | hsa-miR-106a    | hsa-miR-93      | 1 | 0.77101 | 0.92162 |
| Bone Marrow | trichostatin A | hsa-miR-106a    | hsa-miR-520a-3p | 0 | 0.62821 | 0.00000 |
| Bone Marrow | trichostatin A | hsa-miR-106a    | hsa-miR-519d    | 0 | 0.76689 | 0.92704 |
| Bone Marrow | trichostatin A | hsa-miR-106b    | hsa-miR-17      | 1 | 0.95939 | 0.92430 |
| Bone Marrow | trichostatin A | hsa-miR-106b    | hsa-miR-20a     | 1 | 0.84795 | 0.92378 |
| Bone Marrow | trichostatin A | hsa-miR-106b    | hsa-miR-20b     | 1 | 0.81871 | 0.91713 |
| Bone Marrow | trichostatin A | hsa-miR-106b    | hsa-miR-93      | 1 | 0.78655 | 0.92031 |
| Bone Marrow | trichostatin A | hsa-miR-106b    | hsa-miR-520a-3p | 0 | 0.60256 | 0.00000 |
| Bone Marrow | trichostatin A | hsa-miR-106b    | hsa-miR-519d    | 0 | 0.76351 | 0.92580 |
| Bone Marrow | trichostatin A | hsa-miR-17      | hsa-miR-20a     | 1 | 0.99492 | 0.91839 |
| Bone Marrow | trichostatin A | hsa-miR-17      | hsa-miR-20b     | 1 | 0.97970 | 0.92876 |
| Bone Marrow | trichostatin A | hsa-miR-17      | hsa-miR-93      | 1 | 0.92386 | 0.91720 |
| Bone Marrow | trichostatin A | hsa-miR-17      | hsa-miR-519d    | 0 | 0.90355 | 0.94162 |
| Bone Marrow | trichostatin A | hsa-miR-181a    | hsa-miR-181c    | 1 | 0.84758 | 0.94367 |
| Bone Marrow | trichostatin A | hsa-miR-195     | hsa-miR-424     | 0 | 0.72911 | 0.94707 |

|             |                |                 |                 |   |         |         |
|-------------|----------------|-----------------|-----------------|---|---------|---------|
| Bone Marrow | trichostatin A | hsa-miR-20a     | hsa-miR-20b     | 1 | 0.85792 | 0.94068 |
| Bone Marrow | trichostatin A | hsa-miR-20a     | hsa-miR-93      | 1 | 0.75749 | 0.92975 |
| Bone Marrow | trichostatin A | hsa-miR-20a     | hsa-miR-519d    | 0 | 0.78041 | 0.92772 |
| Bone Marrow | trichostatin A | hsa-miR-20b     | hsa-miR-93      | 1 | 0.76776 | 0.94597 |
| Bone Marrow | trichostatin A | hsa-miR-20b     | hsa-miR-519d    | 0 | 0.78716 | 0.93208 |
| Bone Marrow | trichostatin A | hsa-miR-23a     | hsa-miR-23b     | 1 | 0.93023 | 0.95828 |
| Bone Marrow | trichostatin A | hsa-miR-26a     | hsa-miR-26b     | 1 | 0.85238 | 0.91124 |
| Bone Marrow | trichostatin A | hsa-miR-302a    | hsa-miR-302b    | 1 | 0.85259 | 0.95381 |
| Bone Marrow | trichostatin A | hsa-miR-302a    | hsa-miR-302d    | 1 | 0.80952 | 0.93156 |
| Bone Marrow | trichostatin A | hsa-miR-302a    | hsa-miR-373     | 0 | 0.66667 | 0.00000 |
| Bone Marrow | trichostatin A | hsa-miR-302a    | hsa-miR-520b    | 0 | 0.68803 | 0.00000 |
| Bone Marrow | trichostatin A | hsa-miR-302a    | hsa-miR-520a-3p | 0 | 0.85897 | 0.00000 |
| Bone Marrow | trichostatin A | hsa-miR-302b    | hsa-miR-302d    | 1 | 0.77291 | 0.92288 |
| Bone Marrow | trichostatin A | hsa-miR-302b    | hsa-miR-520b    | 0 | 0.64957 | 0.00000 |
| Bone Marrow | trichostatin A | hsa-miR-302b    | hsa-miR-373     | 0 | 0.66534 | 0.00000 |
| Bone Marrow | trichostatin A | hsa-miR-302b    | hsa-miR-520a-3p | 0 | 0.82051 | 0.00000 |
| Bone Marrow | trichostatin A | hsa-miR-302d    | hsa-miR-372     | 0 | 0.61111 | 0.00000 |
| Bone Marrow | trichostatin A | hsa-miR-302d    | hsa-miR-520b    | 0 | 0.67521 | 0.00000 |
| Bone Marrow | trichostatin A | hsa-miR-302d    | hsa-miR-373     | 0 | 0.69841 | 0.00000 |
| Bone Marrow | trichostatin A | hsa-miR-302d    | hsa-miR-520a-3p | 0 | 0.86538 | 0.00000 |
| Bone Marrow | trichostatin A | hsa-miR-372     | hsa-miR-93      | 0 | 0.60700 | 0.00000 |
| Bone Marrow | trichostatin A | hsa-miR-372     | hsa-miR-520b    | 0 | 0.63248 | 0.90042 |
| Bone Marrow | trichostatin A | hsa-miR-372     | hsa-miR-373     | 0 | 0.73152 | 0.00000 |
| Bone Marrow | trichostatin A | hsa-miR-372     | hsa-miR-520a-3p | 0 | 0.81410 | 0.00000 |
| Bone Marrow | trichostatin A | hsa-miR-373     | hsa-miR-520b    | 0 | 0.77350 | 0.00000 |
| Bone Marrow | trichostatin A | hsa-miR-373     | hsa-miR-520a-3p | 0 | 0.85256 | 0.00000 |
| Bone Marrow | trichostatin A | hsa-miR-519d    | hsa-miR-520a-3p | 1 | 0.00000 | 0.00000 |
| Bone Marrow | trichostatin A | hsa-miR-519d    | hsa-miR-520b    | 1 | 0.00000 | 0.00000 |
| Bone Marrow | trichostatin A | hsa-miR-519d    | hsa-miR-520g    | 1 | 0.00000 | 0.00000 |
| Bone Marrow | trichostatin A | hsa-miR-519d    | hsa-miR-520h    | 1 | 0.00000 | 0.00000 |
| Bone Marrow | trichostatin A | hsa-miR-519d    | hsa-miR-93      | 0 | 0.77365 | 0.91494 |
| Bone Marrow | trichostatin A | hsa-miR-520a-3p | hsa-miR-520b    | 1 | 0.89744 | 0.92174 |
| Bone Marrow | trichostatin A | hsa-miR-520a-3p | hsa-miR-520g    | 1 | 0.00000 | 0.00000 |
| Bone Marrow | trichostatin A | hsa-miR-520a-3p | hsa-miR-520h    | 1 | 0.00000 | 0.00000 |
| Bone Marrow | trichostatin A | hsa-miR-520b    | hsa-miR-520g    | 1 | 0.00000 | 0.00000 |
| Bone Marrow | trichostatin A | hsa-miR-520b    | hsa-miR-520h    | 1 | 0.00000 | 0.00000 |
| Bone Marrow | trichostatin A | hsa-miR-520g    | hsa-miR-520h    | 1 | 0.94186 | 0.90054 |
| Bone Marrow | trichostatin A | hsa-miR-548a-5p | hsa-miR-548b-3p | 1 | 0.00000 | 0.00000 |
| Bone Marrow | trichostatin A | hsa-miR-548a-5p | hsa-miR-548d-3p | 1 | 0.00000 | 0.00000 |
| Bone Marrow | trichostatin A | hsa-miR-548a-5p | hsa-miR-548d-5p | 1 | 0.83436 | 0.93251 |
| Bone Marrow | trichostatin A | hsa-miR-548a-5p | hsa-miR-548n    | 1 | 0.00000 | 0.00000 |
| Bone Marrow | trichostatin A | hsa-miR-548a-5p | hsa-miR-570     | 1 | 0.00000 | 0.00000 |
| Bone Marrow | trichostatin A | hsa-miR-548b-3p | hsa-miR-548d-3p | 1 | 0.00000 | 0.00000 |
| Bone Marrow | trichostatin A | hsa-miR-548b-3p | hsa-miR-548d-5p | 1 | 0.00000 | 0.00000 |

|             |                      |                 |                 |   |         |         |
|-------------|----------------------|-----------------|-----------------|---|---------|---------|
| Bone Marrow | trichostatin A       | hsa-miR-548b-3p | hsa-miR-548n    | 1 | 0.00000 | 0.00000 |
| Bone Marrow | trichostatin A       | hsa-miR-548b-3p | hsa-miR-570     | 1 | 0.00000 | 0.00000 |
| Bone Marrow | trichostatin A       | hsa-miR-548d-3p | hsa-miR-548d-5p | 1 | 0.00000 | 0.00000 |
| Bone Marrow | trichostatin A       | hsa-miR-548d-3p | hsa-miR-548n    | 1 | 0.00000 | 0.00000 |
| Bone Marrow | trichostatin A       | hsa-miR-548d-3p | hsa-miR-570     | 1 | 0.00000 | 0.00000 |
| Bone Marrow | trichostatin A       | hsa-miR-548d-5p | hsa-miR-548n    | 1 | 0.00000 | 0.00000 |
| Bone Marrow | trichostatin A       | hsa-miR-548d-5p | hsa-miR-570     | 1 | 0.00000 | 0.00000 |
| Bone Marrow | trichostatin A       | hsa-miR-548n    | hsa-miR-570     | 1 | 0.00000 | 0.00000 |
| Bone Marrow | triflusal            | hsa-miR-23a     | hsa-miR-23b     | 1 | 0.93023 | 0.95828 |
| Bone Marrow | trimethobenzamide    | hsa-miR-302d    | hsa-miR-520b    | 0 | 0.67521 | 0.00000 |
| Bone Marrow | trimethobenzamide    | hsa-miR-520b    | hsa-miR-520g    | 1 | 0.00000 | 0.00000 |
| Bone Marrow | tyloxapol            | hsa-miR-302a    | hsa-miR-520a-3p | 0 | 0.85897 | 0.00000 |
| Bone Marrow | tyloxapol            | hsa-miR-520a-3p | hsa-miR-520h    | 1 | 0.00000 | 0.00000 |
| Bone Marrow | tyloxapol            | hsa-miR-548b-3p | hsa-miR-570     | 1 | 0.00000 | 0.00000 |
| Bone Marrow | verteporfin          | hsa-miR-548b-3p | hsa-miR-548d-5p | 1 | 0.00000 | 0.00000 |
| Bone Marrow | verteporfin          | hsa-miR-548b-3p | hsa-miR-548n    | 1 | 0.00000 | 0.00000 |
| Bone Marrow | verteporfin          | hsa-miR-548b-3p | hsa-miR-570     | 1 | 0.00000 | 0.00000 |
| Bone Marrow | verteporfin          | hsa-miR-548d-5p | hsa-miR-548n    | 1 | 0.00000 | 0.00000 |
| Bone Marrow | verteporfin          | hsa-miR-548d-5p | hsa-miR-570     | 1 | 0.00000 | 0.00000 |
| Bone Marrow | verteporfin          | hsa-miR-548n    | hsa-miR-570     | 1 | 0.00000 | 0.00000 |
| Bone Marrow | viomycin             | hsa-miR-302b    | hsa-miR-373     | 0 | 0.66534 | 0.00000 |
| Bone Marrow | viomycin             | hsa-miR-372     | hsa-miR-373     | 0 | 0.73152 | 0.00000 |
| Bone Marrow | viomycin             | hsa-miR-520g    | hsa-miR-520h    | 1 | 0.94186 | 0.90054 |
| Esophagus   | trichostatin A       | hsa-miR-15b     | hsa-miR-195     | 1 | 0.79545 | 0.95002 |
| Esophagus   | trichostatin A       | hsa-miR-15b     | hsa-miR-424     | 0 | 0.78509 | 0.94103 |
| Esophagus   | trichostatin A       | hsa-miR-195     | hsa-miR-424     | 0 | 0.75000 | 0.94707 |
| Esophagus   | trichostatin A       | hsa-miR-520g    | hsa-miR-520h    | 1 | 0.91964 | 0.90054 |
| Gastric     | cephaeline           | hsa-miR-199a*   | hsa-miR-199b-3p | 1 | 0.00000 | 0.00000 |
| Gastric     | diloxanide           | hsa-miR-92a     | hsa-miR-92b     | 1 | 0.97222 | 0.94459 |
| Gastric     | medrysone            | hsa-miR-92a     | hsa-miR-92b     | 1 | 0.97222 | 0.94459 |
| Gastric     | meticrane            | hsa-miR-92a     | hsa-miR-92b     | 1 | 0.97222 | 0.94459 |
| Gastric     | trichostatin A       | hsa-miR-199a*   | hsa-miR-199a-3p | 1 | 0.00000 | 0.00000 |
| Gastric     | trichostatin A       | hsa-miR-199a*   | hsa-miR-199b-3p | 1 | 0.00000 | 0.00000 |
| Gastric     | trichostatin A       | hsa-miR-199a-3p | hsa-miR-199b-3p | 1 | 1.00000 | 0.92952 |
| Gastric     | trichostatin A       | hsa-miR-29a     | hsa-miR-29c     | 1 | 0.92424 | 0.96836 |
| Gastric     | trichostatin A       | hsa-miR-363     | hsa-miR-92b     | 0 | 0.82353 | 0.90829 |
| Gastric     | trichostatin A       | hsa-miR-363     | hsa-miR-92a     | 0 | 0.94444 | 0.90417 |
| Gastric     | trichostatin A       | hsa-miR-506     | hsa-miR-507     | 1 | 0.00000 | 0.00000 |
| Gastric     | trichostatin A       | hsa-miR-506     | hsa-miR-511     | 1 | 0.00000 | 0.00000 |
| Gastric     | trichostatin A       | hsa-miR-507     | hsa-miR-511     | 1 | 0.00000 | 0.00000 |
| Gastric     | trichostatin A       | hsa-miR-767-3p  | hsa-miR-767-5p  | 1 | 0.00000 | 0.00000 |
| Gastric     | trichostatin A       | hsa-miR-92a     | hsa-miR-92b     | 1 | 0.97222 | 0.94459 |
| Gastric     | ursodeoxycholic acid | hsa-miR-92a     | hsa-miR-92b     | 1 | 0.97222 | 0.94459 |
| Gastric     | vorinostat           | hsa-miR-363     | hsa-miR-92b     | 0 | 0.82353 | 0.90829 |

|           |                |                |                 |   |         |         |
|-----------|----------------|----------------|-----------------|---|---------|---------|
| Gastric   | vorinostat     | hsa-miR-363    | hsa-miR-92a     | 0 | 0.94444 | 0.90417 |
| Gastric   | vorinostat     | hsa-miR-92a    | hsa-miR-92b     | 1 | 0.97222 | 0.94459 |
| Germ Cell | 5224221        | hsa-miR-30a-5p | hsa-miR-30c     | 1 | 0.86842 | 0.00000 |
| Germ Cell | geldanamycin   | hsa-miR-320a   | hsa-miR-320b    | 1 | 1.00000 | 1.00000 |
| Germ Cell | geldanamycin   | hsa-miR-320a   | hsa-miR-320c    | 1 | 1.00000 | 0.99413 |
| Germ Cell | geldanamycin   | hsa-miR-320b   | hsa-miR-320c    | 1 | 1.00000 | 0.99413 |
| Germ Cell | LY-294002      | hsa-miR-141    | hsa-miR-200a    | 1 | 0.85374 | 0.95551 |
| Germ Cell | LY-294002      | hsa-miR-23a    | hsa-miR-23b     | 1 | 0.88767 | 0.95828 |
| Germ Cell | LY-294002      | hsa-miR-26a    | hsa-miR-26b     | 1 | 0.82558 | 0.91124 |
| Germ Cell | LY-294002      | hsa-miR-302a   | hsa-miR-302d    | 1 | 0.79153 | 0.93156 |
| Germ Cell | LY-294002      | hsa-miR-302a   | hsa-miR-520a-3p | 0 | 0.84659 | 0.00000 |
| Germ Cell | LY-294002      | hsa-miR-302d   | hsa-miR-520a-3p | 0 | 0.85795 | 0.00000 |
| Germ Cell | LY-294002      | hsa-miR-372    | hsa-miR-520a-3p | 0 | 0.80682 | 0.00000 |
| Germ Cell | MG-262         | hsa-miR-320a   | hsa-miR-320b    | 1 | 1.00000 | 1.00000 |
| Germ Cell | MG-262         | hsa-miR-320a   | hsa-miR-320c    | 1 | 1.00000 | 0.99413 |
| Germ Cell | MG-262         | hsa-miR-320b   | hsa-miR-320c    | 1 | 1.00000 | 0.99413 |
| Germ Cell | tanespimycin   | hsa-miR-32     | hsa-miR-92b     | 0 | 0.83254 | 0.90135 |
| Germ Cell | tanespimycin   | hsa-miR-32     | hsa-miR-92a     | 0 | 0.93785 | 0.00000 |
| Germ Cell | tanespimycin   | hsa-miR-320a   | hsa-miR-320b    | 1 | 1.00000 | 1.00000 |
| Germ Cell | tanespimycin   | hsa-miR-320a   | hsa-miR-320c    | 1 | 1.00000 | 0.99413 |
| Germ Cell | tanespimycin   | hsa-miR-320b   | hsa-miR-320c    | 1 | 1.00000 | 0.99413 |
| Germ Cell | tanespimycin   | hsa-miR-92a    | hsa-miR-92b     | 1 | 0.96045 | 0.94459 |
| Germ Cell | thioridazine   | hsa-miR-302a   | hsa-miR-302b    | 1 | 0.83226 | 0.95381 |
| Germ Cell | thioridazine   | hsa-miR-302a   | hsa-miR-302c    | 1 | 0.79257 | 0.92471 |
| Germ Cell | thioridazine   | hsa-miR-302b   | hsa-miR-302c    | 1 | 0.84516 | 0.92925 |
| Germ Cell | thioridazine   | hsa-miR-30c    | hsa-miR-30d     | 1 | 0.89344 | 0.96684 |
| Germ Cell | thioridazine   | hsa-miR-520f   | hsa-miR-522     | 1 | 0.00000 | 0.00000 |
| Germ Cell | trichostatin A | hsa-miR-103    | hsa-miR-107     | 1 | 0.90951 | 0.95042 |
| Germ Cell | trichostatin A | hsa-miR-106a   | hsa-miR-17      | 1 | 0.98507 | 0.92268 |
| Germ Cell | trichostatin A | hsa-miR-106a   | hsa-miR-20a     | 1 | 0.83059 | 0.93376 |
| Germ Cell | trichostatin A | hsa-miR-106a   | hsa-miR-93      | 1 | 0.76941 | 0.92162 |
| Germ Cell | trichostatin A | hsa-miR-106a   | hsa-miR-520a-3p | 0 | 0.60795 | 0.00000 |
| Germ Cell | trichostatin A | hsa-miR-106a   | hsa-miR-519d    | 0 | 0.75926 | 0.92704 |
| Germ Cell | trichostatin A | hsa-miR-124    | hsa-miR-506     | 0 | 0.89706 | 0.91547 |
| Germ Cell | trichostatin A | hsa-miR-141    | hsa-miR-200a    | 1 | 0.85374 | 0.95551 |
| Germ Cell | trichostatin A | hsa-miR-141    | hsa-miR-200c    | 1 | 0.00000 | 0.00000 |
| Germ Cell | trichostatin A | hsa-miR-15a    | hsa-miR-15b     | 1 | 0.83824 | 0.95459 |
| Germ Cell | trichostatin A | hsa-miR-15a    | hsa-miR-16      | 1 | 0.79036 | 0.95453 |
| Germ Cell | trichostatin A | hsa-miR-15a    | hsa-miR-195     | 1 | 0.80401 | 0.94836 |
| Germ Cell | trichostatin A | hsa-miR-15a    | hsa-miR-424     | 0 | 0.73996 | 0.94729 |
| Germ Cell | trichostatin A | hsa-miR-15a    | hsa-miR-497     | 0 | 0.79618 | 0.94762 |
| Germ Cell | trichostatin A | hsa-miR-15b    | hsa-miR-16      | 1 | 0.78782 | 0.95288 |
| Germ Cell | trichostatin A | hsa-miR-15b    | hsa-miR-195     | 1 | 0.79510 | 0.95002 |
| Germ Cell | trichostatin A | hsa-miR-15b    | hsa-miR-424     | 0 | 0.75899 | 0.94103 |

|           |                |                |                 |   |         |         |
|-----------|----------------|----------------|-----------------|---|---------|---------|
| Germ Cell | trichostatin A | hsa-miR-15b    | hsa-miR-497     | 0 | 0.78132 | 0.94547 |
| Germ Cell | trichostatin A | hsa-miR-16     | hsa-miR-195     | 1 | 0.85746 | 0.96761 |
| Germ Cell | trichostatin A | hsa-miR-16     | hsa-miR-424     | 0 | 0.72304 | 0.95111 |
| Germ Cell | trichostatin A | hsa-miR-16     | hsa-miR-497     | 0 | 0.74735 | 0.94899 |
| Germ Cell | trichostatin A | hsa-miR-17     | hsa-miR-20a     | 1 | 0.98134 | 0.91839 |
| Germ Cell | trichostatin A | hsa-miR-17     | hsa-miR-93      | 1 | 0.92910 | 0.91720 |
| Germ Cell | trichostatin A | hsa-miR-17     | hsa-miR-519d    | 0 | 0.91045 | 0.94162 |
| Germ Cell | trichostatin A | hsa-miR-181a   | hsa-miR-181c    | 1 | 0.86016 | 0.94367 |
| Germ Cell | trichostatin A | hsa-miR-181a   | hsa-miR-181d    | 1 | 0.79208 | 0.94249 |
| Germ Cell | trichostatin A | hsa-miR-181c   | hsa-miR-181d    | 1 | 0.82058 | 0.92187 |
| Germ Cell | trichostatin A | hsa-miR-195    | hsa-miR-424     | 0 | 0.72606 | 0.94707 |
| Germ Cell | trichostatin A | hsa-miR-195    | hsa-miR-497     | 0 | 0.74833 | 0.94812 |
| Germ Cell | trichostatin A | hsa-miR-200a   | hsa-miR-200c    | 1 | 0.00000 | 0.00000 |
| Germ Cell | trichostatin A | hsa-miR-20a    | hsa-miR-93      | 1 | 0.75862 | 0.92975 |
| Germ Cell | trichostatin A | hsa-miR-20a    | hsa-miR-520a-3p | 0 | 0.60795 | 0.00000 |
| Germ Cell | trichostatin A | hsa-miR-20a    | hsa-miR-519d    | 0 | 0.78571 | 0.92772 |
| Germ Cell | trichostatin A | hsa-miR-23a    | hsa-miR-23b     | 1 | 0.88767 | 0.95828 |
| Germ Cell | trichostatin A | hsa-miR-302a   | hsa-miR-520b    | 0 | 0.63918 | 0.00000 |
| Germ Cell | trichostatin A | hsa-miR-302a   | hsa-miR-520e    | 0 | 0.68914 | 0.00000 |
| Germ Cell | trichostatin A | hsa-miR-302a   | hsa-miR-520a-3p | 0 | 0.84659 | 0.00000 |
| Germ Cell | trichostatin A | hsa-miR-32     | hsa-miR-367     | 0 | 0.70189 | 0.00000 |
| Germ Cell | trichostatin A | hsa-miR-32     | hsa-miR-363     | 0 | 0.71923 | 0.00000 |
| Germ Cell | trichostatin A | hsa-miR-32     | hsa-miR-92b     | 0 | 0.83254 | 0.90135 |
| Germ Cell | trichostatin A | hsa-miR-32     | hsa-miR-92a     | 0 | 0.93785 | 0.00000 |
| Germ Cell | trichostatin A | hsa-miR-320a   | hsa-miR-320b    | 1 | 1.00000 | 1.00000 |
| Germ Cell | trichostatin A | hsa-miR-320a   | hsa-miR-320c    | 1 | 1.00000 | 0.99413 |
| Germ Cell | trichostatin A | hsa-miR-320b   | hsa-miR-320c    | 1 | 1.00000 | 0.99413 |
| Germ Cell | trichostatin A | hsa-miR-363    | hsa-miR-367     | 0 | 0.73077 | 0.00000 |
| Germ Cell | trichostatin A | hsa-miR-363    | hsa-miR-92b     | 0 | 0.83254 | 0.90829 |
| Germ Cell | trichostatin A | hsa-miR-363    | hsa-miR-92a     | 0 | 0.93785 | 0.90417 |
| Germ Cell | trichostatin A | hsa-miR-367    | hsa-miR-92b     | 0 | 0.81818 | 0.00000 |
| Germ Cell | trichostatin A | hsa-miR-367    | hsa-miR-92a     | 0 | 0.92090 | 0.00000 |
| Germ Cell | trichostatin A | hsa-miR-369-3p | hsa-miR-382     | 1 | 0.00000 | 0.00000 |
| Germ Cell | trichostatin A | hsa-miR-369-3p | hsa-miR-409-3p  | 1 | 0.00000 | 0.00000 |
| Germ Cell | trichostatin A | hsa-miR-369-3p | hsa-miR-494     | 1 | 0.00000 | 0.00000 |
| Germ Cell | trichostatin A | hsa-miR-374a   | hsa-miR-374b    | 1 | 0.92857 | 0.97086 |
| Germ Cell | trichostatin A | hsa-miR-382    | hsa-miR-409-3p  | 1 | 0.00000 | 0.00000 |
| Germ Cell | trichostatin A | hsa-miR-382    | hsa-miR-494     | 1 | 0.00000 | 0.00000 |
| Germ Cell | trichostatin A | hsa-miR-409-3p | hsa-miR-494     | 1 | 0.00000 | 0.00000 |
| Germ Cell | trichostatin A | hsa-miR-424    | hsa-miR-497     | 0 | 0.75159 | 0.94679 |
| Germ Cell | trichostatin A | hsa-miR-519a   | hsa-miR-519d    | 1 | 0.00000 | 0.00000 |
| Germ Cell | trichostatin A | hsa-miR-519a   | hsa-miR-520a-3p | 1 | 0.00000 | 0.00000 |
| Germ Cell | trichostatin A | hsa-miR-519a   | hsa-miR-520b    | 1 | 0.00000 | 0.00000 |
| Germ Cell | trichostatin A | hsa-miR-519a   | hsa-miR-520d-5p | 1 | 0.00000 | 0.00000 |

|               |                |                 |                 |   |         |         |
|---------------|----------------|-----------------|-----------------|---|---------|---------|
| Germ Cell     | trichostatin A | hsa-miR-519a    | hsa-miR-520e    | 1 | 0.00000 | 0.00000 |
| Germ Cell     | trichostatin A | hsa-miR-519a    | hsa-miR-520f    | 1 | 0.00000 | 0.00000 |
| Germ Cell     | trichostatin A | hsa-miR-519a    | hsa-miR-522     | 1 | 0.00000 | 0.00000 |
| Germ Cell     | trichostatin A | hsa-miR-519a    | hsa-miR-524-5p  | 1 | 0.00000 | 0.00000 |
| Germ Cell     | trichostatin A | hsa-miR-519d    | hsa-miR-520a-3p | 1 | 0.00000 | 0.00000 |
| Germ Cell     | trichostatin A | hsa-miR-519d    | hsa-miR-520b    | 1 | 0.00000 | 0.00000 |
| Germ Cell     | trichostatin A | hsa-miR-519d    | hsa-miR-520d-5p | 1 | 0.00000 | 0.00000 |
| Germ Cell     | trichostatin A | hsa-miR-519d    | hsa-miR-520e    | 1 | 0.00000 | 0.00000 |
| Germ Cell     | trichostatin A | hsa-miR-519d    | hsa-miR-520f    | 1 | 0.00000 | 0.00000 |
| Germ Cell     | trichostatin A | hsa-miR-519d    | hsa-miR-522     | 1 | 0.00000 | 0.00000 |
| Germ Cell     | trichostatin A | hsa-miR-519d    | hsa-miR-524-5p  | 1 | 0.00000 | 0.00000 |
| Germ Cell     | trichostatin A | hsa-miR-519d    | hsa-miR-93      | 0 | 0.79365 | 0.91494 |
| Germ Cell     | trichostatin A | hsa-miR-520a-3p | hsa-miR-520b    | 1 | 0.89773 | 0.92174 |
| Germ Cell     | trichostatin A | hsa-miR-520a-3p | hsa-miR-520d-5p | 1 | 0.00000 | 0.00000 |
| Germ Cell     | trichostatin A | hsa-miR-520a-3p | hsa-miR-520e    | 1 | 0.86364 | 0.90507 |
| Germ Cell     | trichostatin A | hsa-miR-520a-3p | hsa-miR-520f    | 1 | 0.00000 | 0.00000 |
| Germ Cell     | trichostatin A | hsa-miR-520a-3p | hsa-miR-522     | 1 | 0.00000 | 0.00000 |
| Germ Cell     | trichostatin A | hsa-miR-520a-3p | hsa-miR-524-5p  | 1 | 0.00000 | 0.00000 |
| Germ Cell     | trichostatin A | hsa-miR-520a-3p | hsa-miR-93      | 0 | 0.62500 | 0.00000 |
| Germ Cell     | trichostatin A | hsa-miR-520b    | hsa-miR-520d-5p | 1 | 0.00000 | 0.00000 |
| Germ Cell     | trichostatin A | hsa-miR-520b    | hsa-miR-520e    | 1 | 0.80899 | 0.93789 |
| Germ Cell     | trichostatin A | hsa-miR-520b    | hsa-miR-520f    | 1 | 0.00000 | 0.00000 |
| Germ Cell     | trichostatin A | hsa-miR-520b    | hsa-miR-522     | 1 | 0.00000 | 0.00000 |
| Germ Cell     | trichostatin A | hsa-miR-520b    | hsa-miR-524-5p  | 1 | 0.00000 | 0.00000 |
| Germ Cell     | trichostatin A | hsa-miR-520d-5p | hsa-miR-520e    | 1 | 0.00000 | 0.00000 |
| Germ Cell     | trichostatin A | hsa-miR-520d-5p | hsa-miR-520f    | 1 | 0.00000 | 0.00000 |
| Germ Cell     | trichostatin A | hsa-miR-520d-5p | hsa-miR-522     | 1 | 0.00000 | 0.00000 |
| Germ Cell     | trichostatin A | hsa-miR-520d-5p | hsa-miR-524-5p  | 1 | 0.92097 | 0.97718 |
| Germ Cell     | trichostatin A | hsa-miR-520e    | hsa-miR-520f    | 1 | 0.00000 | 0.00000 |
| Germ Cell     | trichostatin A | hsa-miR-520e    | hsa-miR-522     | 1 | 0.00000 | 0.00000 |
| Germ Cell     | trichostatin A | hsa-miR-520e    | hsa-miR-524-5p  | 1 | 0.00000 | 0.00000 |
| Germ Cell     | trichostatin A | hsa-miR-520f    | hsa-miR-522     | 1 | 0.00000 | 0.00000 |
| Germ Cell     | trichostatin A | hsa-miR-520f    | hsa-miR-524-5p  | 1 | 0.00000 | 0.00000 |
| Germ Cell     | trichostatin A | hsa-miR-522     | hsa-miR-524-5p  | 1 | 0.00000 | 0.00000 |
| Germ Cell     | trichostatin A | hsa-miR-548e    | hsa-miR-548f    | 1 | 0.97674 | 0.99594 |
| Germ Cell     | trichostatin A | hsa-miR-548e    | hsa-miR-548p    | 1 | 0.00000 | 0.00000 |
| Germ Cell     | trichostatin A | hsa-miR-548f    | hsa-miR-548p    | 1 | 0.00000 | 0.00000 |
| Germ Cell     | trichostatin A | hsa-miR-92a     | hsa-miR-92b     | 1 | 0.96045 | 0.94459 |
| Germ Cell     | vorinostat     | hsa-miR-32      | hsa-miR-92b     | 0 | 0.83254 | 0.90135 |
| Germ Cell     | vorinostat     | hsa-miR-32      | hsa-miR-92a     | 0 | 0.93785 | 0.00000 |
| Germ Cell     | vorinostat     | hsa-miR-92a     | hsa-miR-92b     | 1 | 0.96045 | 0.94459 |
| Germ Cell     | withaferin A   | hsa-miR-320a    | hsa-miR-320b    | 1 | 1.00000 | 1.00000 |
| Head and Neck | trichostatin A | hsa-miR-130a    | hsa-miR-130b    | 1 | 0.82081 | 0.95660 |
| Head and Neck | trichostatin A | hsa-miR-130a    | hsa-miR-301b    | 1 | 0.83186 | 0.94998 |

|               |                |                 |                 |   |         |         |
|---------------|----------------|-----------------|-----------------|---|---------|---------|
| Head and Neck | trichostatin A | hsa-miR-130b    | hsa-miR-301b    | 1 | 0.85398 | 0.94118 |
| Head and Neck | trichostatin A | hsa-miR-19a     | hsa-miR-19b     | 1 | 0.89779 | 0.96625 |
| Head and Neck | trichostatin A | hsa-miR-29a     | hsa-miR-29c     | 1 | 0.90506 | 0.96836 |
| Leukemia      | LY-294002      | hsa-miR-181a    | hsa-miR-181b    | 1 | 0.83377 | 0.94504 |
| Leukemia      | LY-294002      | hsa-miR-181a    | hsa-miR-181c    | 1 | 0.86501 | 0.94367 |
| Leukemia      | LY-294002      | hsa-miR-181a    | hsa-miR-181d    | 1 | 0.78182 | 0.94249 |
| Leukemia      | LY-294002      | hsa-miR-181b    | hsa-miR-181c    | 1 | 0.82920 | 0.91919 |
| Leukemia      | LY-294002      | hsa-miR-181b    | hsa-miR-181d    | 1 | 0.86241 | 0.95834 |
| Leukemia      | LY-294002      | hsa-miR-181c    | hsa-miR-181d    | 1 | 0.80716 | 0.92187 |
| Leukemia      | sirolimus      | hsa-miR-181b    | hsa-miR-181c    | 1 | 0.82920 | 0.91919 |
| Leukemia      | thioridazine   | hsa-miR-302b    | hsa-miR-302d    | 1 | 0.78571 | 0.92288 |
| Leukemia      | trichostatin A | hsa-miR-1       | hsa-miR-206     | 1 | 0.79570 | 0.93215 |
| Leukemia      | trichostatin A | hsa-miR-1       | hsa-miR-613     | 0 | 0.64904 | 0.90355 |
| Leukemia      | trichostatin A | hsa-miR-130a    | hsa-miR-130b    | 1 | 0.79614 | 0.95660 |
| Leukemia      | trichostatin A | hsa-miR-130a    | hsa-miR-301a    | 1 | 0.83650 | 0.94509 |
| Leukemia      | trichostatin A | hsa-miR-130a    | hsa-miR-301b    | 1 | 0.85887 | 0.94998 |
| Leukemia      | trichostatin A | hsa-miR-130b    | hsa-miR-301a    | 1 | 0.82129 | 0.94568 |
| Leukemia      | trichostatin A | hsa-miR-130b    | hsa-miR-301b    | 1 | 0.85081 | 0.94118 |
| Leukemia      | trichostatin A | hsa-miR-15a     | hsa-miR-15b     | 1 | 0.82265 | 0.95459 |
| Leukemia      | trichostatin A | hsa-miR-181a    | hsa-miR-181b    | 1 | 0.83377 | 0.94504 |
| Leukemia      | trichostatin A | hsa-miR-181a    | hsa-miR-181c    | 1 | 0.86501 | 0.94367 |
| Leukemia      | trichostatin A | hsa-miR-181a    | hsa-miR-181d    | 1 | 0.78182 | 0.94249 |
| Leukemia      | trichostatin A | hsa-miR-181b    | hsa-miR-181c    | 1 | 0.82920 | 0.91919 |
| Leukemia      | trichostatin A | hsa-miR-181b    | hsa-miR-181d    | 1 | 0.86241 | 0.95834 |
| Leukemia      | trichostatin A | hsa-miR-181c    | hsa-miR-181d    | 1 | 0.80716 | 0.92187 |
| Leukemia      | trichostatin A | hsa-miR-19a     | hsa-miR-19b     | 1 | 0.91563 | 0.96625 |
| Leukemia      | trichostatin A | hsa-miR-200b    | hsa-miR-200c    | 1 | 0.85106 | 0.95153 |
| Leukemia      | trichostatin A | hsa-miR-200b    | hsa-miR-429     | 1 | 0.84127 | 0.94966 |
| Leukemia      | trichostatin A | hsa-miR-200c    | hsa-miR-429     | 1 | 0.80317 | 0.92554 |
| Leukemia      | trichostatin A | hsa-miR-206     | hsa-miR-613     | 0 | 0.68269 | 0.00000 |
| Leukemia      | trichostatin A | hsa-miR-300     | hsa-miR-369-3p  | 1 | 0.00000 | 0.00000 |
| Leukemia      | trichostatin A | hsa-miR-300     | hsa-miR-381     | 1 | 0.84456 | 0.00000 |
| Leukemia      | trichostatin A | hsa-miR-300     | hsa-miR-655     | 1 | 0.00000 | 0.00000 |
| Leukemia      | trichostatin A | hsa-miR-301a    | hsa-miR-301b    | 1 | 0.95565 | 0.98374 |
| Leukemia      | trichostatin A | hsa-miR-302c    | hsa-miR-302d    | 1 | 0.74769 | 0.91719 |
| Leukemia      | trichostatin A | hsa-miR-369-3p  | hsa-miR-381     | 1 | 0.00000 | 0.00000 |
| Leukemia      | trichostatin A | hsa-miR-369-3p  | hsa-miR-655     | 1 | 0.00000 | 0.00000 |
| Leukemia      | trichostatin A | hsa-miR-381     | hsa-miR-655     | 1 | 0.00000 | 0.00000 |
| Leukemia      | trichostatin A | hsa-miR-511     | hsa-miR-512-3p  | 1 | 0.00000 | 0.00000 |
| Leukemia      | trichostatin A | hsa-miR-519e    | hsa-miR-520d-5p | 1 | 0.00000 | 0.00000 |
| Leukemia      | trichostatin A | hsa-miR-519e    | hsa-miR-524-5p  | 1 | 0.00000 | 0.00000 |
| Leukemia      | trichostatin A | hsa-miR-520d-5p | hsa-miR-524-5p  | 1 | 0.93789 | 0.97718 |
| Leukemia      | trichostatin A | hsa-miR-548n    | hsa-miR-603     | 1 | 0.00000 | 0.00000 |
| Leukemia      | valproic acid  | hsa-miR-181a    | hsa-miR-181b    | 1 | 0.83377 | 0.94504 |

|          |                  |                 |                 |   |         |         |
|----------|------------------|-----------------|-----------------|---|---------|---------|
| Leukemia | wortmannin       | hsa-miR-181a    | hsa-miR-181b    | 1 | 0.83377 | 0.94504 |
| Liver    | 5140203          | hsa-miR-30a     | hsa-miR-30b     | 1 | 0.92500 | 0.91991 |
| Liver    | 5140203          | hsa-miR-30a     | hsa-miR-30c     | 1 | 0.94500 | 0.92823 |
| Liver    | 5140203          | hsa-miR-30a     | hsa-miR-30d     | 1 | 0.93500 | 0.92609 |
| Liver    | 5140203          | hsa-miR-30b     | hsa-miR-30c     | 1 | 0.93600 | 0.97476 |
| Liver    | 5140203          | hsa-miR-30b     | hsa-miR-30d     | 1 | 0.89113 | 0.96513 |
| Liver    | 5140203          | hsa-miR-30c     | hsa-miR-30d     | 1 | 0.88306 | 0.96684 |
| Liver    | 5182598          | hsa-miR-520a-3p | hsa-miR-520e    | 1 | 0.85950 | 0.90507 |
| Liver    | 8-azaguanine     | hsa-miR-30a     | hsa-miR-30c     | 1 | 0.94500 | 0.92823 |
| Liver    | astemizole       | hsa-miR-30a     | hsa-miR-30c     | 1 | 0.94500 | 0.92823 |
| Liver    | clemizole        | hsa-miR-25      | hsa-miR-92a     | 1 | 0.95763 | 0.00000 |
| Liver    | fisetin          | hsa-miR-25      | hsa-miR-363     | 0 | 0.76250 | 0.90791 |
| Liver    | LY-294002        | hsa-miR-520a-3p | hsa-miR-520e    | 1 | 0.85950 | 0.90507 |
| Liver    | menadione        | hsa-miR-30a     | hsa-miR-30c     | 1 | 0.94500 | 0.92823 |
| Liver    | phenoxybenzamine | hsa-miR-30b     | hsa-miR-30c     | 1 | 0.93600 | 0.97476 |
| Liver    | tanespimycin     | hsa-miR-25      | hsa-miR-92a     | 1 | 0.95763 | 0.00000 |
| Liver    | trichostatin A   | hsa-miR-17      | hsa-miR-93      | 1 | 0.93333 | 0.91720 |
| Liver    | trichostatin A   | hsa-miR-17      | hsa-miR-519d    | 0 | 0.87778 | 0.94162 |
| Liver    | trichostatin A   | hsa-miR-19a     | hsa-miR-19b     | 1 | 0.90909 | 0.96625 |
| Liver    | trichostatin A   | hsa-miR-200b    | hsa-miR-200c    | 1 | 0.86266 | 0.95153 |
| Liver    | trichostatin A   | hsa-miR-200b    | hsa-miR-429     | 1 | 0.83262 | 0.94966 |
| Liver    | trichostatin A   | hsa-miR-200c    | hsa-miR-429     | 1 | 0.80000 | 0.92554 |
| Liver    | trichostatin A   | hsa-miR-25      | hsa-miR-92a     | 1 | 0.95763 | 0.00000 |
| Liver    | trichostatin A   | hsa-miR-30a     | hsa-miR-30b     | 1 | 0.92500 | 0.91991 |
| Liver    | trichostatin A   | hsa-miR-30a     | hsa-miR-30c     | 1 | 0.94500 | 0.92823 |
| Liver    | trichostatin A   | hsa-miR-30a     | hsa-miR-30d     | 1 | 0.93500 | 0.92609 |
| Liver    | trichostatin A   | hsa-miR-30b     | hsa-miR-30c     | 1 | 0.93600 | 0.97476 |
| Liver    | trichostatin A   | hsa-miR-30b     | hsa-miR-30d     | 1 | 0.89113 | 0.96513 |
| Liver    | trichostatin A   | hsa-miR-30c     | hsa-miR-30d     | 1 | 0.88306 | 0.96684 |
| Liver    | trichostatin A   | hsa-miR-372     | hsa-miR-93      | 0 | 0.64734 | 0.00000 |
| Liver    | trichostatin A   | hsa-miR-372     | hsa-miR-520a-3p | 0 | 0.76860 | 0.00000 |
| Liver    | trichostatin A   | hsa-miR-372     | hsa-miR-520e    | 0 | 0.00000 | 0.91029 |
| Liver    | trichostatin A   | hsa-miR-519a    | hsa-miR-519d    | 1 | 0.00000 | 0.00000 |
| Liver    | trichostatin A   | hsa-miR-519a    | hsa-miR-520a-3p | 1 | 0.00000 | 0.00000 |
| Liver    | trichostatin A   | hsa-miR-519a    | hsa-miR-520d-5p | 1 | 0.00000 | 0.00000 |
| Liver    | trichostatin A   | hsa-miR-519a    | hsa-miR-520e    | 1 | 0.00000 | 0.00000 |
| Liver    | trichostatin A   | hsa-miR-519a    | hsa-miR-524-5p  | 1 | 0.00000 | 0.00000 |
| Liver    | trichostatin A   | hsa-miR-519d    | hsa-miR-520a-3p | 1 | 0.00000 | 0.00000 |
| Liver    | trichostatin A   | hsa-miR-519d    | hsa-miR-520d-5p | 1 | 0.00000 | 0.00000 |
| Liver    | trichostatin A   | hsa-miR-519d    | hsa-miR-520e    | 1 | 0.00000 | 0.00000 |
| Liver    | trichostatin A   | hsa-miR-519d    | hsa-miR-524-5p  | 1 | 0.00000 | 0.00000 |
| Liver    | trichostatin A   | hsa-miR-519d    | hsa-miR-93      | 0 | 0.80159 | 0.91494 |
| Liver    | trichostatin A   | hsa-miR-520a-3p | hsa-miR-520d-5p | 1 | 0.00000 | 0.00000 |
| Liver    | trichostatin A   | hsa-miR-520a-3p | hsa-miR-520e    | 1 | 0.85950 | 0.90507 |

|          |                  |                 |                 |   |         |         |
|----------|------------------|-----------------|-----------------|---|---------|---------|
| Liver    | trichostatin A   | hsa-miR-520a-3p | hsa-miR-524-5p  | 1 | 0.00000 | 0.00000 |
| Liver    | trichostatin A   | hsa-miR-520a-3p | hsa-miR-93      | 0 | 0.62810 | 0.00000 |
| Liver    | trichostatin A   | hsa-miR-520d-5p | hsa-miR-520e    | 1 | 0.00000 | 0.00000 |
| Liver    | trichostatin A   | hsa-miR-520d-5p | hsa-miR-524-5p  | 1 | 0.92273 | 0.97718 |
| Liver    | trichostatin A   | hsa-miR-520e    | hsa-miR-524-5p  | 1 | 0.00000 | 0.00000 |
| Liver    | vorinostat       | hsa-miR-30a     | hsa-miR-30c     | 1 | 0.94500 | 0.92823 |
| Liver    | vorinostat       | hsa-miR-30a     | hsa-miR-30d     | 1 | 0.93500 | 0.92609 |
| Liver    | vorinostat       | hsa-miR-30c     | hsa-miR-30d     | 1 | 0.88306 | 0.96684 |
| Pancreas | tanespimycin     | hsa-miR-520g    | hsa-miR-520h    | 1 | 0.92857 | 0.90054 |
| Pancreas | trichostatin A   | hsa-miR-20a     | hsa-miR-519d    | 0 | 0.80769 | 0.92772 |
| Pancreas | trichostatin A   | hsa-miR-519d    | hsa-miR-520g    | 1 | 0.00000 | 0.00000 |
| Pancreas | trichostatin A   | hsa-miR-519d    | hsa-miR-520h    | 1 | 0.00000 | 0.00000 |
| Pancreas | trichostatin A   | hsa-miR-520g    | hsa-miR-520h    | 1 | 0.92857 | 0.90054 |
| Skin     | 5182598          | hsa-miR-30c     | hsa-miR-30e     | 1 | 0.92670 | 0.93603 |
| Skin     | cytisine         | hsa-miR-30c     | hsa-miR-30e     | 1 | 0.92670 | 0.93603 |
| Skin     | trichostatin A   | hsa-miR-30c     | hsa-miR-30e     | 1 | 0.92670 | 0.93603 |
| Thyroid  | alpha-estradiol  | hsa-miR-301a    | hsa-miR-301b    | 1 | 0.98864 | 0.98374 |
| Thyroid  | alpha-estradiol  | hsa-miR-301a    | hsa-miR-454     | 0 | 0.91667 | 0.96979 |
| Thyroid  | alpha-estradiol  | hsa-miR-301b    | hsa-miR-454     | 0 | 0.88095 | 0.96056 |
| Thyroid  | MS-275           | hsa-miR-32      | hsa-miR-363     | 0 | 0.76250 | 0.00000 |
| Thyroid  | naringenin       | hsa-miR-301a    | hsa-miR-301b    | 1 | 0.98864 | 0.98374 |
| Thyroid  | protoveratrine A | hsa-miR-301a    | hsa-miR-301b    | 1 | 0.98864 | 0.98374 |
| Thyroid  | trichostatin A   | hsa-miR-1       | hsa-miR-206     | 1 | 0.85057 | 0.93215 |
| Thyroid  | trichostatin A   | hsa-miR-148a    | hsa-miR-152     | 1 | 0.77451 | 0.94008 |
| Thyroid  | trichostatin A   | hsa-miR-199a-3p | hsa-miR-199b-3p | 1 | 1.00000 | 0.92952 |
| Thyroid  | trichostatin A   | hsa-miR-19a     | hsa-miR-19b     | 1 | 0.92647 | 0.96625 |
| Thyroid  | trichostatin A   | hsa-miR-221     | hsa-miR-222     | 1 | 0.68675 | 0.90522 |
| Thyroid  | trichostatin A   | hsa-miR-27a     | hsa-miR-27b     | 1 | 0.96269 | 0.96029 |
| Thyroid  | trichostatin A   | hsa-miR-301a    | hsa-miR-301b    | 1 | 0.98864 | 0.98374 |
| Thyroid  | trichostatin A   | hsa-miR-301a    | hsa-miR-454     | 0 | 0.91667 | 0.96979 |
| Thyroid  | trichostatin A   | hsa-miR-301b    | hsa-miR-454     | 0 | 0.88095 | 0.96056 |
| Thyroid  | trichostatin A   | hsa-miR-519a    | hsa-miR-524-5p  | 1 | 0.00000 | 0.00000 |
| Tongue   | adiphenine       | hsa-miR-506     | hsa-miR-510     | 1 | 0.00000 | 0.00000 |
| Tongue   | ifenprodil       | hsa-miR-199a-3p | hsa-miR-199b-3p | 1 | 1.00000 | 0.92952 |
| Tongue   | iloprost         | hsa-miR-517b    | hsa-miR-526b*   | 1 | 0.00000 | 0.00000 |
| Tongue   | rimexolone       | hsa-miR-517b    | hsa-miR-526b*   | 1 | 0.00000 | 0.00000 |
| Tongue   | sirolimus        | hsa-miR-199a-3p | hsa-miR-199b-3p | 1 | 1.00000 | 0.92952 |
| Tongue   | trichostatin A   | hsa-miR-1       | hsa-miR-206     | 1 | 0.83824 | 0.93215 |
| Tongue   | trichostatin A   | hsa-miR-1       | hsa-miR-613     | 0 | 0.67742 | 0.90355 |
| Tongue   | trichostatin A   | hsa-miR-128     | hsa-miR-27b     | 0 | 0.66216 | 0.00000 |
| Tongue   | trichostatin A   | hsa-miR-130a    | hsa-miR-301b    | 1 | 0.85106 | 0.94998 |
| Tongue   | trichostatin A   | hsa-miR-130a    | hsa-miR-454     | 0 | 0.82661 | 0.93651 |
| Tongue   | trichostatin A   | hsa-miR-130a    | hsa-miR-152     | 0 | 0.00000 | 0.91750 |
| Tongue   | trichostatin A   | hsa-miR-135a    | hsa-miR-135b    | 1 | 0.83784 | 0.94015 |

|        |                |                 |                 |   |         |         |
|--------|----------------|-----------------|-----------------|---|---------|---------|
| Tongue | trichostatin A | hsa-miR-148b    | hsa-miR-152     | 1 | 0.77640 | 0.94615 |
| Tongue | trichostatin A | hsa-miR-15a     | hsa-miR-15b     | 1 | 0.82979 | 0.95459 |
| Tongue | trichostatin A | hsa-miR-15a     | hsa-miR-16      | 1 | 0.80276 | 0.95453 |
| Tongue | trichostatin A | hsa-miR-15a     | hsa-miR-195     | 1 | 0.80903 | 0.94836 |
| Tongue | trichostatin A | hsa-miR-15a     | hsa-miR-424     | 0 | 0.74901 | 0.94729 |
| Tongue | trichostatin A | hsa-miR-15a     | hsa-miR-497     | 0 | 0.80242 | 0.94762 |
| Tongue | trichostatin A | hsa-miR-15b     | hsa-miR-16      | 1 | 0.77318 | 0.95288 |
| Tongue | trichostatin A | hsa-miR-15b     | hsa-miR-195     | 1 | 0.79055 | 0.95002 |
| Tongue | trichostatin A | hsa-miR-15b     | hsa-miR-424     | 0 | 0.77668 | 0.94103 |
| Tongue | trichostatin A | hsa-miR-15b     | hsa-miR-497     | 0 | 0.80847 | 0.94547 |
| Tongue | trichostatin A | hsa-miR-16      | hsa-miR-195     | 1 | 0.84394 | 0.96761 |
| Tongue | trichostatin A | hsa-miR-16      | hsa-miR-424     | 0 | 0.73715 | 0.95111 |
| Tongue | trichostatin A | hsa-miR-16      | hsa-miR-497     | 0 | 0.74597 | 0.94899 |
| Tongue | trichostatin A | hsa-miR-18a     | hsa-miR-18b     | 1 | 0.78439 | 0.90445 |
| Tongue | trichostatin A | hsa-miR-195     | hsa-miR-424     | 0 | 0.73922 | 0.94707 |
| Tongue | trichostatin A | hsa-miR-195     | hsa-miR-497     | 0 | 0.74127 | 0.94812 |
| Tongue | trichostatin A | hsa-miR-199a-3p | hsa-miR-199b-3p | 1 | 1.00000 | 0.92952 |
| Tongue | trichostatin A | hsa-miR-19a     | hsa-miR-19b     | 1 | 0.89882 | 0.96625 |
| Tongue | trichostatin A | hsa-miR-204     | hsa-miR-211     | 1 | 0.81471 | 0.94887 |
| Tongue | trichostatin A | hsa-miR-206     | hsa-miR-613     | 0 | 0.69585 | 0.00000 |
| Tongue | trichostatin A | hsa-miR-221     | hsa-miR-222     | 1 | 0.65726 | 0.90522 |
| Tongue | trichostatin A | hsa-miR-301b    | hsa-miR-454     | 0 | 0.82979 | 0.96056 |
| Tongue | trichostatin A | hsa-miR-424     | hsa-miR-497     | 0 | 0.79234 | 0.94679 |
| Tongue | trichostatin A | hsa-miR-506     | hsa-miR-507     | 1 | 0.00000 | 0.00000 |
| Tongue | trichostatin A | hsa-miR-506     | hsa-miR-510     | 1 | 0.00000 | 0.00000 |
| Tongue | trichostatin A | hsa-miR-507     | hsa-miR-510     | 1 | 0.00000 | 0.00000 |
| Tongue | trichostatin A | hsa-miR-517b    | hsa-miR-519a    | 1 | 0.00000 | 0.00000 |
| Tongue | trichostatin A | hsa-miR-517b    | hsa-miR-519c-3p | 1 | 0.00000 | 0.00000 |
| Tongue | trichostatin A | hsa-miR-517b    | hsa-miR-526b    | 1 | 0.00000 | 0.00000 |
| Tongue | trichostatin A | hsa-miR-517b    | hsa-miR-526b*   | 1 | 0.00000 | 0.00000 |
| Tongue | trichostatin A | hsa-miR-519a    | hsa-miR-519c-3p | 1 | 0.89231 | 0.93626 |
| Tongue | trichostatin A | hsa-miR-519a    | hsa-miR-526b    | 1 | 0.00000 | 0.00000 |
| Tongue | trichostatin A | hsa-miR-519a    | hsa-miR-526b*   | 1 | 0.00000 | 0.00000 |
| Tongue | trichostatin A | hsa-miR-519c-3p | hsa-miR-526b    | 1 | 0.00000 | 0.00000 |
| Tongue | trichostatin A | hsa-miR-519c-3p | hsa-miR-526b*   | 1 | 0.00000 | 0.00000 |
| Tongue | trichostatin A | hsa-miR-526b    | hsa-miR-526b*   | 1 | 0.00000 | 0.00000 |
| Uterus | blebbistatin   | hsa-miR-320a    | hsa-miR-320b    | 1 | 1.00000 | 1.00000 |
| Uterus | blebbistatin   | hsa-miR-320a    | hsa-miR-320c    | 1 | 1.00000 | 0.99413 |
| Uterus | blebbistatin   | hsa-miR-320a    | hsa-miR-320d    | 1 | 1.00000 | 0.99303 |
| Uterus | blebbistatin   | hsa-miR-320b    | hsa-miR-320c    | 1 | 1.00000 | 0.99413 |
| Uterus | blebbistatin   | hsa-miR-320b    | hsa-miR-320d    | 1 | 1.00000 | 0.99303 |
| Uterus | blebbistatin   | hsa-miR-320c    | hsa-miR-320d    | 1 | 1.00000 | 0.99887 |
| Uterus | trichostatin A | hsa-miR-103     | hsa-miR-107     | 1 | 0.88701 | 0.95042 |
| Uterus | trichostatin A | hsa-miR-19a     | hsa-miR-19b     | 1 | 0.94578 | 0.96625 |

|        |                |                 |                 |   |         |         |
|--------|----------------|-----------------|-----------------|---|---------|---------|
| Uterus | trichostatin A | hsa-miR-200b    | hsa-miR-200c    | 1 | 0.85714 | 0.95153 |
| Uterus | trichostatin A | hsa-miR-200b    | hsa-miR-429     | 1 | 0.84733 | 0.94966 |
| Uterus | trichostatin A | hsa-miR-200c    | hsa-miR-429     | 1 | 0.81679 | 0.92554 |
| Uterus | trichostatin A | hsa-miR-221     | hsa-miR-222     | 1 | 0.60577 | 0.90522 |
| Uterus | trichostatin A | hsa-miR-23a     | hsa-miR-23b     | 1 | 0.93243 | 0.95828 |
| Uterus | trichostatin A | hsa-miR-25      | hsa-miR-92b     | 1 | 0.86813 | 0.90860 |
| Uterus | trichostatin A | hsa-miR-25      | hsa-miR-32      | 0 | 0.77064 | 0.91546 |
| Uterus | trichostatin A | hsa-miR-32      | hsa-miR-92b     | 0 | 0.84615 | 0.90135 |
| Uterus | trichostatin A | hsa-miR-320a    | hsa-miR-320b    | 1 | 1.00000 | 1.00000 |
| Uterus | trichostatin A | hsa-miR-320a    | hsa-miR-320c    | 1 | 1.00000 | 0.99413 |
| Uterus | trichostatin A | hsa-miR-320a    | hsa-miR-320d    | 1 | 1.00000 | 0.99303 |
| Uterus | trichostatin A | hsa-miR-320b    | hsa-miR-320c    | 1 | 1.00000 | 0.99413 |
| Uterus | trichostatin A | hsa-miR-320b    | hsa-miR-320d    | 1 | 1.00000 | 0.99303 |
| Uterus | trichostatin A | hsa-miR-320c    | hsa-miR-320d    | 1 | 1.00000 | 0.99887 |
| Uterus | trichostatin A | hsa-miR-518a-5p | hsa-miR-519b-3p | 1 | 0.00000 | 0.00000 |
| Uterus | trichostatin A | hsa-miR-518a-5p | hsa-miR-519c-3p | 1 | 0.00000 | 0.00000 |
| Uterus | trichostatin A | hsa-miR-518a-5p | hsa-miR-520f    | 1 | 0.00000 | 0.00000 |
| Uterus | trichostatin A | hsa-miR-518a-5p | hsa-miR-526b    | 1 | 0.00000 | 0.00000 |
| Uterus | trichostatin A | hsa-miR-519b-3p | hsa-miR-519c-3p | 1 | 0.92391 | 0.96310 |
| Uterus | trichostatin A | hsa-miR-519b-3p | hsa-miR-520f    | 1 | 0.00000 | 0.00000 |
| Uterus | trichostatin A | hsa-miR-519b-3p | hsa-miR-526b    | 1 | 0.00000 | 0.00000 |
| Uterus | trichostatin A | hsa-miR-519c-3p | hsa-miR-520f    | 1 | 0.00000 | 0.00000 |
| Uterus | trichostatin A | hsa-miR-519c-3p | hsa-miR-526b    | 1 | 0.00000 | 0.00000 |
| Uterus | trichostatin A | hsa-miR-520f    | hsa-miR-526b    | 1 | 0.00000 | 0.00000 |
| Uterus | trichostatin A | hsa-miR-548m    | hsa-miR-548p    | 1 | 0.00000 | 0.00000 |
| Uterus | vorinostat     | hsa-miR-320c    | hsa-miR-320d    | 1 | 1.00000 | 0.99887 |

---

**Table S3.** All small molecule modules.

| Cancer      | Module          | Degree | Property |
|-------------|-----------------|--------|----------|
| Bone Marrow | hsa-miR-570     | 74     | 1        |
| Bone Marrow | hsa-miR-125b    | 72     | 1        |
| Bone Marrow | hsa-miR-487a    | 73     | 1        |
| Bone Marrow | hsa-miR-302b    | 64     | 1        |
| Bone Marrow | hsa-miR-624     | 52     | 1        |
| Bone Marrow | hsa-miR-520h    | 54     | 1        |
| Bone Marrow | hsa-miR-520g    | 49     | 1        |
| Bone Marrow | hsa-miR-203     | 50     | 1        |
| Bone Marrow | hsa-miR-548n    | 33     | 1        |
| Bone Marrow | hsa-miR-302d    | 33     | 1        |
| Bone Marrow | hsa-miR-520b    | 26     | 1        |
| Bone Marrow | hsa-miR-768-3p  | 38     | 1        |
| Bone Marrow | hsa-miR-548d-5p | 28     | 1        |
| Bone Marrow | hsa-miR-548b-3p | 35     | 1        |
| Bone Marrow | hsa-miR-101     | 26     | 1        |
| Bone Marrow | hsa-miR-26b     | 23     | 1        |
| Bone Marrow | hsa-miR-802     | 19     | 1        |
| Bone Marrow | hsa-miR-641     | 19     | 1        |
| Bone Marrow | hsa-miR-590-3p  | 16     | 1        |
| Bone Marrow | hsa-miR-548d-3p | 23     | 1        |
| Bone Marrow | hsa-miR-520a-3p | 18     | 1        |
| Bone Marrow | hsa-miR-548a-5p | 14     | 1        |
| Bone Marrow | hsa-miR-181c    | 14     | 1        |
| Bone Marrow | hsa-miR-373     | 12     | 1        |
| Bone Marrow | hsa-miR-26a     | 11     | 1        |
| Colon       | hsa-miR-26b     | 8      | 1        |
| Gastric     | hsa-miR-483-3p  | 49     | 1        |
| Gastric     | hsa-miR-92a     | 15     | 1        |
| Gastric     | hsa-miR-625     | 9      | 1        |
| Gastric     | hsa-miR-212     | 12     | 1        |
| Gastric     | hsa-miR-557     | 11     | 1        |
| Gastric     | hsa-miR-92b     | 9      | 1        |
| Gastric     | hsa-miR-199a-3p | 6      | 1        |
| Germ Cell   | hsa-miR-1264    | 31     | 1        |
| Germ Cell   | hsa-miR-1305    | 9      | 1        |
| Germ Cell   | hsa-miR-522     | 8      | 1        |
| Germ Cell   | hsa-miR-371-5p  | 7      | 1        |
| Germ Cell   | hsa-miR-491-3p  | 6      | 1        |
| Germ Cell   | hsa-miR-382     | 6      | 1        |
| Germ Cell   | hsa-miR-320a    | 6      | 1        |
| Germ Cell   | hsa-miR-320b    | 5      | 1        |

|             |                 |    |   |
|-------------|-----------------|----|---|
| Germ Cell   | hsa-miR-23b     | 5  | 1 |
| Germ Cell   | hsa-miR-139-5p  | 5  | 1 |
| Germ Cell   | hsa-miR-1323    | 5  | 1 |
| Leukemia    | hsa-miR-569     | 13 | 1 |
| Leukemia    | hsa-miR-873     | 10 | 1 |
| Liver       | hsa-miR-129-5p  | 31 | 1 |
| Liver       | hsa-miR-641     | 21 | 1 |
| Liver       | hsa-miR-92a     | 21 | 1 |
| Liver       | hsa-miR-30a     | 13 | 1 |
| Liver       | hsa-miR-30c     | 8  | 1 |
| Pancreas    | hsa-miR-34c     | 14 | 1 |
| Skin        | hsa-miR-1207-3p | 33 | 1 |
| Skin        | hsa-miR-450b-5p | 5  | 1 |
| Testis      | hsa-miR-645     | 44 | 1 |
| Testis      | hsa-miR-500     | 14 | 1 |
| Testis      | hsa-miR-586     | 12 | 1 |
| Testis      | hsa-miR-518f*   | 11 | 1 |
| Thyroid     | hsa-miR-139-5p  | 67 | 1 |
| Thyroid     | hsa-miR-129-5p  | 12 | 1 |
| Thyroid     | hsa-miR-32      | 10 | 1 |
| Thyroid     | hsa-miR-19a     | 8  | 1 |
| Thyroid     | hsa-miR-301b    | 7  | 1 |
| Tongue      | hsa-miR-517b    | 29 | 1 |
| Tongue      | hsa-miR-526b*   | 24 | 1 |
| Tongue      | hsa-miR-510     | 7  | 1 |
| Tongue      | hsa-miR-1279    | 17 | 1 |
| Tongue      | hsa-miR-490-5p  | 17 | 1 |
| Tongue      | hsa-miR-128b    | 6  | 1 |
| Tongue      | hsa-miR-1179    | 5  | 1 |
| Uterus      | hsa-miR-548m    | 26 | 1 |
| Bladder     | hsa-miR-769-5p  | 18 | 0 |
| Bone Marrow | hsa-miR-181a    | 16 | 0 |
| Bone Marrow | hsa-miR-372     | 12 | 0 |
| Bone Marrow | hsa-miR-302a    | 9  | 0 |
| Bone Marrow | hsa-miR-217     | 8  | 0 |
| Bone Marrow | hsa-miR-106b    | 8  | 0 |
| Bone Marrow | hsa-miR-23b     | 7  | 0 |
| Bone Marrow | hsa-miR-495     | 6  | 0 |
| Bone Marrow | hsa-miR-20b     | 6  | 0 |
| Bone Marrow | hsa-miR-20a     | 6  | 0 |
| Bone Marrow | hsa-miR-519d    | 5  | 0 |
| Bone Marrow | hsa-miR-23a     | 5  | 0 |
| Bone Marrow | hsa-miR-106a    | 5  | 0 |
| Gastric     | hsa-miR-767-5p  | 6  | 0 |

|               |                 |    |         |
|---------------|-----------------|----|---------|
| Gastric       | hsa-miR-363     | 6  | 0       |
| Germ Cell     | hsa-miR-92a     | 6  | 0       |
| Germ Cell     | hsa-miR-448     | 5  | 0       |
| Germ Cell     | hsa-miR-200a    | 5  | 0       |
| Germ Cell     | hsa-miR-153     | 5  | 0       |
| Head and Neck | hsa-miR-32      | 9  | 0       |
| Head and Neck | hsa-miR-600     | 5  | 0       |
| Leukemia      | hsa-miR-181b    | 6  | 0       |
| Leukemia      | hsa-miR-128b    | 5  | 0       |
| Liver         | hsa-miR-25      | 11 | 0       |
| Liver         | hsa-miR-646     | 10 | 0       |
| Liver         | hsa-miR-520e    | 6  | 0       |
| Liver         | hsa-miR-520a-3p | 5  | 0       |
| Pancreas      | hsa-miR-380     | 10 | 0       |
| Skin          | hsa-miR-30e     | 6  | 0       |
| Testis        | hsa-miR-224     | 7  | 0       |
| Thyroid       | hsa-let-7e      | 8  | 0       |
| Thyroid       | hsa-miR-548k    | 7  | 0       |
| Thyroid       | hsa-miR-524-5p  | 6  | 0       |
| Thyroid       | hsa-miR-152     | 6  | 0       |
| Thyroid       | hsa-miR-363     | 5  | 0       |
| Thyroid       | hsa-miR-301a    | 5  | 0       |
| Thyroid       | hsa-miR-199a-3p | 5  | 0       |
| Tongue        | hsa-miR-1284    | 7  | 0       |
| Uterus        | hsa-miR-1284    | 6  | 0       |
|               |                 |    | 0.64546 |

**Table S4.** All small molecule pairs in the small molecule modules and their properties.

| Cancer      | Module       | Small molecule 1      | Small molecule 2 | Chemical structure | Drug interaction | Common drug targets |
|-------------|--------------|-----------------------|------------------|--------------------|------------------|---------------------|
| Bone Marrow | hsa-miR-101  | etiocholanolone       | Prestwick-692    | 0.68               | 0                | 0.00                |
| Bone Marrow | hsa-miR-101  | biperiden             | diphenhydramine  | 0.00               | 1                | 0.00                |
| Bone Marrow | hsa-miR-125b | piperidolate          | adiphenine       | 0.96               | 0                | 0.00                |
| Bone Marrow | hsa-miR-125b | fludrocortisone       | prednisone       | 0.89               | 0                | 0.00                |
| Bone Marrow | hsa-miR-125b | etiocholanolone       | adrenosterone    | 0.87               | 0                | 0.00                |
| Bone Marrow | hsa-miR-125b | fisetin               | hesperetin       | 0.87               | 0                | 0.00                |
| Bone Marrow | hsa-miR-125b | fludrocortisone       | medrysone        | 0.86               | 0                | 0.00                |
| Bone Marrow | hsa-miR-125b | medrysone             | prednisone       | 0.82               | 0                | 0.00                |
| Bone Marrow | hsa-miR-125b | prednisone            | adrenosterone    | 0.78               | 0                | 0.00                |
| Bone Marrow | hsa-miR-125b | medrysone             | adrenosterone    | 0.74               | 0                | 0.00                |
| Bone Marrow | hsa-miR-125b | acepromazine          | trifluoperazine  | 0.70               | 0                | 0.00                |
| Bone Marrow | hsa-miR-125b | fludrocortisone       | adrenosterone    | 0.69               | 0                | 0.00                |
| Bone Marrow | hsa-miR-125b | methacholine chloride | nipecotic acid   | 0.67               | 0                | 0.00                |
| Bone Marrow | hsa-miR-125b | nipecotic acid        | tranexamic acid  | 0.67               | 0                | 0.00                |
| Bone Marrow | hsa-miR-125b | etiocholanolone       | fludrocortisone  | 0.66               | 0                | 0.00                |
| Bone Marrow | hsa-miR-125b | etiocholanolone       | medrysone        | 0.64               | 0                | 0.00                |
| Bone Marrow | hsa-miR-125b | heptaminol            | tranexamic acid  | 0.62               | 0                | 0.00                |
| Bone Marrow | hsa-miR-125b | dexpropranolol        | penbutolol       | 0.60               | 0                | 0.00                |
| Bone Marrow | hsa-miR-125b | clemastine            | cetirizine       | 0.00               | 1                | 1.00                |
| Bone Marrow | hsa-miR-125b | diphenhydramine       | cetirizine       | 0.00               | 1                | 1.00                |
| Bone Marrow | hsa-miR-125b | diphenhydramine       | clemastine       | 0.00               | 1                | 1.00                |
| Bone Marrow | hsa-miR-125b | diphenhydramine       | trazodone        | 0.00               | 1                | 1.00                |
| Bone Marrow | hsa-miR-125b | midodrine             | trazodone        | 0.00               | 0                | 1.00                |
| Bone Marrow | hsa-miR-125b | trazodone             | cetirizine       | 0.00               | 1                | 1.00                |
| Bone Marrow | hsa-miR-125b | trazodone             | clemastine       | 0.00               | 1                | 1.00                |
| Bone Marrow | hsa-miR-125b | trifluoperazine       | omeprazole       | 0.00               | 0                | 1.00                |
| Bone Marrow | hsa-miR-125b | haloperidol           | lisuride         | 0.00               | 0                | 0.67                |
| Bone Marrow | hsa-miR-125b | midodrine             | amiodarone       | 0.00               | 0                | 0.50                |
| Bone Marrow | hsa-miR-125b | trifluoperazine       | midodrine        | 0.00               | 0                | 0.50                |
| Bone Marrow | hsa-miR-125b | amiodarone            | diltiazem        | 0.00               | 1                | 0.00                |
| Bone Marrow | hsa-miR-125b | amiodarone            | fludrocortisone  | 0.00               | 1                | 0.00                |
| Bone Marrow | hsa-miR-125b | amiodarone            | haloperidol      | 0.00               | 1                | 0.00                |
| Bone Marrow | hsa-miR-125b | amiodarone            | iohexol          | 0.00               | 1                | 0.00                |
| Bone Marrow | hsa-miR-125b | amiodarone            | metronidazole    | 0.00               | 1                | 0.00                |
| Bone Marrow | hsa-miR-125b | amiodarone            | penbutolol       | 0.00               | 1                | 0.00                |
| Bone Marrow | hsa-miR-125b | amiodarone            | trazodone        | 0.00               | 1                | 0.00                |
| Bone Marrow | hsa-miR-125b | amiodarone            | trifluoperazine  | 0.00               | 1                | 0.00                |
| Bone Marrow | hsa-miR-125b | cetirizine            | diltiazem        | 0.00               | 1                | 0.00                |

|             |              |                       |                 |      |   |      |
|-------------|--------------|-----------------------|-----------------|------|---|------|
| Bone Marrow | hsa-miR-125b | cetirizine            | haloperidol     | 0.00 | 1 | 0.00 |
| Bone Marrow | hsa-miR-125b | cetirizine            | trifluoperazine | 0.00 | 1 | 0.00 |
| Bone Marrow | hsa-miR-125b | clemastine            | haloperidol     | 0.00 | 1 | 0.00 |
| Bone Marrow | hsa-miR-125b | clemastine            | trifluoperazine | 0.00 | 1 | 0.00 |
| Bone Marrow | hsa-miR-125b | diltiazem             | diphenhydramine | 0.00 | 1 | 0.00 |
| Bone Marrow | hsa-miR-125b | diltiazem             | fludrocortisone | 0.00 | 1 | 0.00 |
| Bone Marrow | hsa-miR-125b | diltiazem             | haloperidol     | 0.00 | 1 | 0.00 |
| Bone Marrow | hsa-miR-125b | diltiazem             | penbutolol      | 0.00 | 1 | 0.00 |
| Bone Marrow | hsa-miR-125b | diltiazem             | prednisone      | 0.00 | 1 | 0.00 |
| Bone Marrow | hsa-miR-125b | diltiazem             | sulfinpyrazone  | 0.00 | 1 | 0.00 |
| Bone Marrow | hsa-miR-125b | diltiazem             | trazodone       | 0.00 | 1 | 0.00 |
| Bone Marrow | hsa-miR-125b | diltiazem             | trifluoperazine | 0.00 | 1 | 0.00 |
| Bone Marrow | hsa-miR-125b | diphenhydramine       | haloperidol     | 0.00 | 1 | 0.00 |
| Bone Marrow | hsa-miR-125b | diphenhydramine       | penbutolol      | 0.00 | 1 | 0.00 |
| Bone Marrow | hsa-miR-125b | diphenhydramine       | trifluoperazine | 0.00 | 1 | 0.00 |
| Bone Marrow | hsa-miR-125b | fludrocortisone       | haloperidol     | 0.00 | 1 | 0.00 |
| Bone Marrow | hsa-miR-125b | fludrocortisone       | metformin       | 0.00 | 1 | 0.00 |
| Bone Marrow | hsa-miR-125b | fludrocortisone       | midodrine       | 0.00 | 1 | 0.00 |
| Bone Marrow | hsa-miR-125b | fludrocortisone       | penbutolol      | 0.00 | 1 | 0.00 |
| Bone Marrow | hsa-miR-125b | fludrocortisone       | trifluoperazine | 0.00 | 1 | 0.00 |
| Bone Marrow | hsa-miR-125b | haloperidol           | iohexol         | 0.00 | 1 | 0.00 |
| Bone Marrow | hsa-miR-125b | haloperidol           | trazodone       | 0.00 | 1 | 0.00 |
| Bone Marrow | hsa-miR-125b | haloperidol           | trifluoperazine | 0.00 | 1 | 0.00 |
| Bone Marrow | hsa-miR-125b | iohexol               | metformin       | 0.00 | 1 | 0.00 |
| Bone Marrow | hsa-miR-125b | iohexol               | penbutolol      | 0.00 | 1 | 0.00 |
| Bone Marrow | hsa-miR-125b | iohexol               | trazodone       | 0.00 | 1 | 0.00 |
| Bone Marrow | hsa-miR-125b | iohexol               | trifluoperazine | 0.00 | 1 | 0.00 |
| Bone Marrow | hsa-miR-125b | metformin             | midodrine       | 0.00 | 1 | 0.00 |
| Bone Marrow | hsa-miR-125b | metformin             | penbutolol      | 0.00 | 1 | 0.00 |
| Bone Marrow | hsa-miR-125b | metformin             | prednisone      | 0.00 | 1 | 0.00 |
| Bone Marrow | hsa-miR-125b | metformin             | trifluoperazine | 0.00 | 1 | 0.00 |
| Bone Marrow | hsa-miR-125b | metformin             | vorinostat      | 0.00 | 1 | 0.00 |
| Bone Marrow | hsa-miR-125b | midodrine             | penbutolol      | 0.00 | 1 | 0.00 |
| Bone Marrow | hsa-miR-125b | penbutolol            | prednisone      | 0.00 | 1 | 0.00 |
| Bone Marrow | hsa-miR-125b | penbutolol            | sulfinpyrazone  | 0.00 | 1 | 0.00 |
| Bone Marrow | hsa-miR-125b | penbutolol            | trazodone       | 0.00 | 1 | 0.00 |
| Bone Marrow | hsa-miR-125b | penbutolol            | trifluoperazine | 0.00 | 1 | 0.00 |
| Bone Marrow | hsa-miR-125b | trazodone             | trifluoperazine | 0.00 | 1 | 0.00 |
| Bone Marrow | hsa-miR-181c | chenodeoxycholic acid | Prestwick-692   | 0.64 | 0 | 0.00 |
| Bone Marrow | hsa-miR-203  | nadolol               | penbutolol      | 0.87 | 0 | 1.00 |
| Bone Marrow | hsa-miR-203  | isoflupredone         | medrysone       | 0.86 | 0 | 0.00 |
| Bone Marrow | hsa-miR-203  | medrysone             | rimexolone      | 0.86 | 0 | 0.50 |
| Bone Marrow | hsa-miR-203  | isoflupredone         | rimexolone      | 0.80 | 0 | 0.00 |

|             |             |                  |                        |      |   |      |
|-------------|-------------|------------------|------------------------|------|---|------|
| Bone Marrow | hsa-miR-203 | medryson         | Prestwick-692          | 0.70 | 0 | 0.00 |
| Bone Marrow | hsa-miR-203 | estradiol        | rimexolone             | 0.62 | 0 | 0.00 |
| Bone Marrow | hsa-miR-203 | isoflupredone    | Prestwick-692          | 0.61 | 0 | 0.00 |
| Bone Marrow | hsa-miR-203 | Prestwick-692    | rimexolone             | 0.61 | 0 | 0.00 |
| Bone Marrow | hsa-miR-203 | sulfadimethoxine | sulfamethoxypyridazine | 0.60 | 0 | 0.00 |
| Bone Marrow | hsa-miR-203 | midodrine        | trazodone              | 0.00 | 0 | 1.00 |
| Bone Marrow | hsa-miR-203 | nadolol          | timolol                | 0.00 | 0 | 1.00 |
| Bone Marrow | hsa-miR-203 | penbutolol       | timolol                | 0.00 | 0 | 1.00 |
| Bone Marrow | hsa-miR-203 | trazodone        | cetirizine             | 0.00 | 1 | 1.00 |
| Bone Marrow | hsa-miR-203 | amiodarone       | nadolol                | 0.00 | 1 | 0.50 |
| Bone Marrow | hsa-miR-203 | amiodarone       | phenoxybenzamine       | 0.00 | 0 | 0.50 |
| Bone Marrow | hsa-miR-203 | amiodarone       | timolol                | 0.00 | 1 | 0.50 |
| Bone Marrow | hsa-miR-203 | midodrine        | amiodarone             | 0.00 | 0 | 0.50 |
| Bone Marrow | hsa-miR-203 | midodrine        | phenoxybenzamine       | 0.00 | 0 | 0.50 |
| Bone Marrow | hsa-miR-203 | trazodone        | phenoxybenzamine       | 0.00 | 1 | 0.50 |
| Bone Marrow | hsa-miR-203 | amiodarone       | diltiazem              | 0.00 | 1 | 0.00 |
| Bone Marrow | hsa-miR-203 | amiodarone       | penbutolol             | 0.00 | 1 | 0.00 |
| Bone Marrow | hsa-miR-203 | amiodarone       | trazodone              | 0.00 | 1 | 0.00 |
| Bone Marrow | hsa-miR-203 | cetirizine       | diltiazem              | 0.00 | 1 | 0.00 |
| Bone Marrow | hsa-miR-203 | cetirizine       | phenoxybenzamine       | 0.00 | 1 | 0.00 |
| Bone Marrow | hsa-miR-203 | diltiazem        | estradiol              | 0.00 | 1 | 0.00 |
| Bone Marrow | hsa-miR-203 | diltiazem        | fenoprofen             | 0.00 | 1 | 0.00 |
| Bone Marrow | hsa-miR-203 | diltiazem        | nadolol                | 0.00 | 1 | 0.00 |
| Bone Marrow | hsa-miR-203 | diltiazem        | penbutolol             | 0.00 | 1 | 0.00 |
| Bone Marrow | hsa-miR-203 | diltiazem        | timolol                | 0.00 | 1 | 0.00 |
| Bone Marrow | hsa-miR-203 | diltiazem        | trazodone              | 0.00 | 1 | 0.00 |
| Bone Marrow | hsa-miR-203 | fenoprofen       | nadolol                | 0.00 | 1 | 0.00 |
| Bone Marrow | hsa-miR-203 | fenoprofen       | penbutolol             | 0.00 | 1 | 0.00 |
| Bone Marrow | hsa-miR-203 | fenoprofen       | timolol                | 0.00 | 1 | 0.00 |
| Bone Marrow | hsa-miR-203 | guanadrel        | midodrine              | 0.00 | 1 | 0.00 |
| Bone Marrow | hsa-miR-203 | guanadrel        | nadolol                | 0.00 | 1 | 0.00 |
| Bone Marrow | hsa-miR-203 | guanadrel        | penbutolol             | 0.00 | 1 | 0.00 |
| Bone Marrow | hsa-miR-203 | guanadrel        | timolol                | 0.00 | 1 | 0.00 |
| Bone Marrow | hsa-miR-203 | guanadrel        | trazodone              | 0.00 | 1 | 0.00 |
| Bone Marrow | hsa-miR-203 | midodrine        | nadolol                | 0.00 | 1 | 0.00 |
| Bone Marrow | hsa-miR-203 | midodrine        | penbutolol             | 0.00 | 1 | 0.00 |
| Bone Marrow | hsa-miR-203 | midodrine        | timolol                | 0.00 | 1 | 0.00 |
| Bone Marrow | hsa-miR-203 | nadolol          | phenoxybenzamine       | 0.00 | 1 | 0.00 |
| Bone Marrow | hsa-miR-203 | nadolol          | trazodone              | 0.00 | 1 | 0.00 |
| Bone Marrow | hsa-miR-203 | penbutolol       | phenoxybenzamine       | 0.00 | 1 | 0.00 |
| Bone Marrow | hsa-miR-203 | penbutolol       | trazodone              | 0.00 | 1 | 0.00 |
| Bone Marrow | hsa-miR-203 | phenoxybenzamine | timolol                | 0.00 | 1 | 0.00 |

|             |              |                               |                 |      |   |      |
|-------------|--------------|-------------------------------|-----------------|------|---|------|
| Bone Marrow | hsa-miR-203  | timolol                       | trazodone       | 0.00 | 1 | 0.00 |
| Bone Marrow | hsa-miR-26a  | nordihydroguaiar<br>etic acid | podophyllotoxin | 0.73 | 0 | 0.00 |
| Bone Marrow | hsa-miR-26b  | bumetanide                    | trazodone       | 0.00 | 1 | 0.00 |
| Bone Marrow | hsa-miR-26b  | tretinoin                     | verteporfin     | 0.00 | 1 | 0.00 |
| Bone Marrow | hsa-miR-302b | fludrocortisone               | isoflupredone   | 1.00 | 0 | 0.00 |
| Bone Marrow | hsa-miR-302b | naringenin                    | apigenin        | 1.00 | 0 | 0.00 |
| Bone Marrow | hsa-miR-302b | piperidolate                  | adiphenine      | 0.96 | 0 | 0.00 |
| Bone Marrow | hsa-miR-302b | chrysin                       | apigenin        | 0.95 | 0 | 0.00 |
| Bone Marrow | hsa-miR-302b | chrysin                       | naringenin      | 0.95 | 0 | 0.00 |
| Bone Marrow | hsa-miR-302b | fludrocortisone               | medrysone       | 0.86 | 0 | 0.00 |
| Bone Marrow | hsa-miR-302b | isoflupredone                 | medrysone       | 0.86 | 0 | 0.00 |
| Bone Marrow | hsa-miR-302b | medrysone                     | rimexolone      | 0.86 | 0 | 0.50 |
| Bone Marrow | hsa-miR-302b | Prestwick-983                 | thioguanosine   | 0.86 | 0 | 0.00 |
| Bone Marrow | hsa-miR-302b | fludrocortisone               | rimexolone      | 0.80 | 0 | 0.00 |
| Bone Marrow | hsa-miR-302b | isoflupredone                 | rimexolone      | 0.80 | 0 | 0.00 |
| Bone Marrow | hsa-miR-302b | etiocholanolone               | levonorgestrel  | 0.76 | 0 | 0.00 |
| Bone Marrow | hsa-miR-302b | fludrocortisone               | levonorgestrel  | 0.72 | 0 | 0.00 |
| Bone Marrow | hsa-miR-302b | isoflupredone                 | levonorgestrel  | 0.72 | 0 | 0.00 |
| Bone Marrow | hsa-miR-302b | levonorgestrel                | medrysone       | 0.71 | 0 | 0.00 |
| Bone Marrow | hsa-miR-302b | medrysone                     | Prestwick-692   | 0.70 | 0 | 0.00 |
| Bone Marrow | hsa-miR-302b | chenodeoxycholi<br>c acid     | etiocholanolone | 0.69 | 0 | 0.00 |
| Bone Marrow | hsa-miR-302b | etiocholanolone               | Prestwick-692   | 0.68 | 0 | 0.00 |
| Bone Marrow | hsa-miR-302b | finasteride                   | medrysone       | 0.68 | 0 | 0.00 |
| Bone Marrow | hsa-miR-302b | levonorgestrel                | rimexolone      | 0.67 | 0 | 0.00 |
| Bone Marrow | hsa-miR-302b | chenodeoxycholi<br>c acid     | medrysone       | 0.66 | 0 | 0.00 |
| Bone Marrow | hsa-miR-302b | etiocholanolone               | fludrocortisone | 0.66 | 0 | 0.00 |
| Bone Marrow | hsa-miR-302b | etiocholanolone               | rimexolone      | 0.66 | 0 | 0.00 |
| Bone Marrow | hsa-miR-302b | fludrocortisone               | Prestwick-692   | 0.66 | 0 | 0.00 |
| Bone Marrow | hsa-miR-302b | levonorgestrel                | alpha-estradiol | 0.65 | 0 | 0.00 |
| Bone Marrow | hsa-miR-302b | chenodeoxycholi<br>c acid     | Prestwick-692   | 0.64 | 0 | 0.00 |
| Bone Marrow | hsa-miR-302b | etiocholanolone               | medrysone       | 0.64 | 0 | 0.00 |
| Bone Marrow | hsa-miR-302b | finasteride                   | isoflupredone   | 0.64 | 0 | 0.00 |
| Bone Marrow | hsa-miR-302b | finasteride                   | rimexolone      | 0.64 | 0 | 0.00 |
| Bone Marrow | hsa-miR-302b | levonorgestrel                | Prestwick-692   | 0.63 | 0 | 0.00 |
| Bone Marrow | hsa-miR-302b | chenodeoxycholi<br>c acid     | fludrocortisone | 0.62 | 0 | 0.00 |
| Bone Marrow | hsa-miR-302b | metronidazole                 | ronidazole      | 0.62 | 0 | 0.00 |
| Bone Marrow | hsa-miR-302b | rimexolone                    | alpha-estradiol | 0.62 | 0 | 0.00 |
| Bone Marrow | hsa-miR-302b | isoflupredone                 | Prestwick-692   | 0.61 | 0 | 0.00 |
| Bone Marrow | hsa-miR-302b | Prestwick-692                 | rimexolone      | 0.61 | 0 | 0.00 |

|             |              |                       |                 |      |   |      |
|-------------|--------------|-----------------------|-----------------|------|---|------|
| Bone Marrow | hsa-miR-302b | diphenhydramine       | trazodone       | 0.00 | 1 | 1.00 |
| Bone Marrow | hsa-miR-302b | guanabenz             | trazodone       | 0.00 | 1 | 1.00 |
| Bone Marrow | hsa-miR-302b | amiodarone            | timolol         | 0.00 | 1 | 0.50 |
| Bone Marrow | hsa-miR-302b | amiodarone            | bepidil         | 0.00 | 1 | 0.00 |
| Bone Marrow | hsa-miR-302b | amiodarone            | doxorubicin     | 0.00 | 1 | 0.00 |
| Bone Marrow | hsa-miR-302b | amiodarone            | fludrocortisone | 0.00 | 1 | 0.00 |
| Bone Marrow | hsa-miR-302b | amiodarone            | metronidazole   | 0.00 | 1 | 0.00 |
| Bone Marrow | hsa-miR-302b | amiodarone            | trazodone       | 0.00 | 1 | 0.00 |
| Bone Marrow | hsa-miR-302b | bepidil               | diphenhydramine | 0.00 | 1 | 0.00 |
| Bone Marrow | hsa-miR-302b | bepidil               | doxorubicin     | 0.00 | 1 | 0.00 |
| Bone Marrow | hsa-miR-302b | bepidil               | timolol         | 0.00 | 1 | 0.00 |
| Bone Marrow | hsa-miR-302b | bepidil               | trazodone       | 0.00 | 1 | 0.00 |
| Bone Marrow | hsa-miR-302b | biperiden             | diphenhydramine | 0.00 | 1 | 0.00 |
| Bone Marrow | hsa-miR-302b | biperiden             | timolol         | 0.00 | 1 | 0.00 |
| Bone Marrow | hsa-miR-302b | biperiden             | trazodone       | 0.00 | 1 | 0.00 |
| Bone Marrow | hsa-miR-302b | diphenhydramine       | guanabenz       | 0.00 | 1 | 0.00 |
| Bone Marrow | hsa-miR-302b | diphenhydramine       | timolol         | 0.00 | 1 | 0.00 |
| Bone Marrow | hsa-miR-302b | fludrocortisone       | guanabenz       | 0.00 | 1 | 0.00 |
| Bone Marrow | hsa-miR-302b | fludrocortisone       | timolol         | 0.00 | 1 | 0.00 |
| Bone Marrow | hsa-miR-302b | levonorgestrel        | timolol         | 0.00 | 1 | 0.00 |
| Bone Marrow | hsa-miR-302b | timolol               | trazodone       | 0.00 | 1 | 0.00 |
| Bone Marrow | hsa-miR-302d | piperidolate          | adiphenine      | 0.96 | 0 | 0.00 |
| Bone Marrow | hsa-miR-302d | fludrocortisone       | medrysone       | 0.86 | 0 | 0.00 |
| Bone Marrow | hsa-miR-302d | chenodeoxycholic acid | medrysone       | 0.66 | 0 | 0.00 |
| Bone Marrow | hsa-miR-302d | chenodeoxycholic acid | fludrocortisone | 0.62 | 0 | 0.00 |
| Bone Marrow | hsa-miR-302d | metronidazole         | ronidazole      | 0.62 | 0 | 0.00 |
| Bone Marrow | hsa-miR-302d | betaxolol             | amiodarone      | 0.00 | 1 | 1.00 |
| Bone Marrow | hsa-miR-302d | betaxolol             | nadolol         | 0.00 | 0 | 1.00 |
| Bone Marrow | hsa-miR-302d | amiodarone            | nadolol         | 0.00 | 1 | 0.50 |
| Bone Marrow | hsa-miR-302d | amiodarone            | bepidil         | 0.00 | 1 | 0.00 |
| Bone Marrow | hsa-miR-302d | amiodarone            | doxorubicin     | 0.00 | 1 | 0.00 |
| Bone Marrow | hsa-miR-302d | amiodarone            | fludrocortisone | 0.00 | 1 | 0.00 |
| Bone Marrow | hsa-miR-302d | amiodarone            | metronidazole   | 0.00 | 1 | 0.00 |
| Bone Marrow | hsa-miR-302d | bepidil               | betaxolol       | 0.00 | 1 | 0.00 |
| Bone Marrow | hsa-miR-302d | bepidil               | doxorubicin     | 0.00 | 1 | 0.00 |
| Bone Marrow | hsa-miR-302d | bepidil               | nadolol         | 0.00 | 1 | 0.00 |
| Bone Marrow | hsa-miR-302d | betaxolol             | biperiden       | 0.00 | 1 | 0.00 |
| Bone Marrow | hsa-miR-302d | betaxolol             | fludrocortisone | 0.00 | 1 | 0.00 |
| Bone Marrow | hsa-miR-302d | biperiden             | nadolol         | 0.00 | 1 | 0.00 |
| Bone Marrow | hsa-miR-302d | dapsone               | metronidazole   | 0.00 | 1 | 0.00 |
| Bone Marrow | hsa-miR-302d | estradiol             | fludrocortisone | 0.00 | 1 | 0.00 |
| Bone Marrow | hsa-miR-302d | fludrocortisone       | nadolol         | 0.00 | 1 | 0.00 |

|             |              |                |                   |      |   |      |
|-------------|--------------|----------------|-------------------|------|---|------|
| Bone Marrow | hsa-miR-373  | gentamicin     | naproxen          | 0.00 | 1 | 0.00 |
| Bone Marrow | hsa-miR-487a | estradiol      | alpha-estradiol   | 1.00 | 0 | 0.00 |
| Bone Marrow | hsa-miR-487a | piperidolate   | adiphenine        | 0.96 | 0 | 0.00 |
| Bone Marrow | hsa-miR-487a | metacycline    | tetracycline      | 0.88 | 0 | 0.00 |
| Bone Marrow | hsa-miR-487a | chlorpromazine | clomipramine      | 0.87 | 1 | 0.00 |
| Bone Marrow | hsa-miR-487a | myricetin      | apigenin          | 0.87 | 0 | 0.00 |
| Bone Marrow | hsa-miR-487a | Prestwick-983  | thioguanosine     | 0.86 | 0 | 0.00 |
| Bone Marrow | hsa-miR-487a | chlorpromazine | acepromazine      | 0.83 | 0 | 0.00 |
| Bone Marrow | hsa-miR-487a | clomipramine   | acepromazine      | 0.73 | 0 | 0.00 |
| Bone Marrow | hsa-miR-487a | levonorgestrel | medrysone         | 0.71 | 0 | 0.00 |
| Bone Marrow | hsa-miR-487a | estradiol      | levonorgestrel    | 0.65 | 0 | 0.50 |
| Bone Marrow | hsa-miR-487a | levonorgestrel | alpha-estradiol   | 0.65 | 0 | 0.00 |
| Bone Marrow | hsa-miR-487a | heptaminol     | tranexamic acid   | 0.62 | 0 | 0.00 |
| Bone Marrow | hsa-miR-487a | levonorgestrel | alprostadil       | 0.60 | 0 | 0.00 |
| Bone Marrow | hsa-miR-487a | nadolol        | timolol           | 0.00 | 0 | 1.00 |
| Bone Marrow | hsa-miR-487a | amiodarone     | nadolol           | 0.00 | 1 | 0.50 |
| Bone Marrow | hsa-miR-487a | amiodarone     | timolol           | 0.00 | 1 | 0.50 |
| Bone Marrow | hsa-miR-487a | midodrine      | amiodarone        | 0.00 | 0 | 0.50 |
| Bone Marrow | hsa-miR-487a | amiodarone     | chlorpromazine    | 0.00 | 1 | 0.00 |
| Bone Marrow | hsa-miR-487a | amiodarone     | clomipramine      | 0.00 | 1 | 0.00 |
| Bone Marrow | hsa-miR-487a | amiodarone     | ethotoin          | 0.00 | 1 | 0.00 |
| Bone Marrow | hsa-miR-487a | amiodarone     | verteporfin       | 0.00 | 1 | 0.00 |
| Bone Marrow | hsa-miR-487a | amiodarone     | vigabatrin        | 0.00 | 1 | 0.00 |
| Bone Marrow | hsa-miR-487a | cetirizine     | chlorpromazine    | 0.00 | 1 | 0.00 |
| Bone Marrow | hsa-miR-487a | cetirizine     | clomipramine      | 0.00 | 1 | 0.00 |
| Bone Marrow | hsa-miR-487a | cetirizine     | ethotoin          | 0.00 | 1 | 0.00 |
| Bone Marrow | hsa-miR-487a | cetirizine     | trimethobenzamide | 0.00 | 1 | 0.00 |
| Bone Marrow | hsa-miR-487a | cetirizine     | vigabatrin        | 0.00 | 1 | 0.00 |
| Bone Marrow | hsa-miR-487a | chlorpromazine | ethotoin          | 0.00 | 1 | 0.00 |
| Bone Marrow | hsa-miR-487a | chlorpromazine | nadolol           | 0.00 | 1 | 0.00 |
| Bone Marrow | hsa-miR-487a | chlorpromazine | timolol           | 0.00 | 1 | 0.00 |
| Bone Marrow | hsa-miR-487a | chlorpromazine | trimethobenzamide | 0.00 | 1 | 0.00 |
| Bone Marrow | hsa-miR-487a | chlorpromazine | verteporfin       | 0.00 | 1 | 0.00 |
| Bone Marrow | hsa-miR-487a | chlorpromazine | vigabatrin        | 0.00 | 1 | 0.00 |
| Bone Marrow | hsa-miR-487a | clomipramine   | estradiol         | 0.00 | 1 | 0.00 |
| Bone Marrow | hsa-miR-487a | clomipramine   | ethotoin          | 0.00 | 1 | 0.00 |
| Bone Marrow | hsa-miR-487a | clomipramine   | nadolol           | 0.00 | 1 | 0.00 |
| Bone Marrow | hsa-miR-487a | clomipramine   | timolol           | 0.00 | 1 | 0.00 |
| Bone Marrow | hsa-miR-487a | clomipramine   | trimethobenzamide | 0.00 | 1 | 0.00 |
| Bone Marrow | hsa-miR-487a | clomipramine   | vigabatrin        | 0.00 | 1 | 0.00 |
| Bone Marrow | hsa-miR-487a | ethotoin       | trimethobenzamide | 0.00 | 1 | 0.00 |
| Bone Marrow | hsa-miR-487a | ethotoin       | vigabatrin        | 0.00 | 1 | 0.00 |
| Bone Marrow | hsa-miR-487a | levonorgestrel | timolol           | 0.00 | 1 | 0.00 |
| Bone Marrow | hsa-miR-487a | levonorgestrel | tranexamic acid   | 0.00 | 1 | 0.00 |

|             |                 |                   |                 |      |   |      |
|-------------|-----------------|-------------------|-----------------|------|---|------|
| Bone Marrow | hsa-miR-487a    | midodrine         | nadolol         | 0.00 | 1 | 0.00 |
| Bone Marrow | hsa-miR-487a    | midodrine         | timolol         | 0.00 | 1 | 0.00 |
| Bone Marrow | hsa-miR-487a    | tetracycline      | verteporfin     | 0.00 | 1 | 0.00 |
| Bone Marrow | hsa-miR-487a    | trimethobenzamide | vigabatrin      | 0.00 | 1 | 0.00 |
| Bone Marrow | hsa-miR-520a-3p | estradiol         | metyrapone      | 0.00 | 1 | 0.00 |
| Bone Marrow | hsa-miR-520b    | fludrocortisone   | isoflupredone   | 1.00 | 0 | 0.00 |
| Bone Marrow | hsa-miR-520b    | naringenin        | apigenin        | 1.00 | 0 | 0.00 |
| Bone Marrow | hsa-miR-520b    | piperidolate      | adiphenine      | 0.96 | 0 | 0.00 |
| Bone Marrow | hsa-miR-520b    | fludrocortisone   | rimexolone      | 0.80 | 0 | 0.00 |
| Bone Marrow | hsa-miR-520b    | isoflupredone     | rimexolone      | 0.80 | 0 | 0.00 |
| Bone Marrow | hsa-miR-520b    | rimexolone        | alpha-estradiol | 0.62 | 0 | 0.00 |
| Bone Marrow | hsa-miR-520b    | amiodarone        | bepidil         | 0.00 | 1 | 0.00 |
| Bone Marrow | hsa-miR-520b    | amiodarone        | doxorubicin     | 0.00 | 1 | 0.00 |
| Bone Marrow | hsa-miR-520b    | amiodarone        | fludrocortisone | 0.00 | 1 | 0.00 |
| Bone Marrow | hsa-miR-520b    | amiodarone        | verteporfin     | 0.00 | 1 | 0.00 |
| Bone Marrow | hsa-miR-520b    | bepidil           | doxorubicin     | 0.00 | 1 | 0.00 |
| Bone Marrow | hsa-miR-520b    | bepidil           | verteporfin     | 0.00 | 1 | 0.00 |
| Bone Marrow | hsa-miR-520g    | fludrocortisone   | medrysone       | 0.86 | 0 | 0.00 |
| Bone Marrow | hsa-miR-520g    | medrysone         | rimexolone      | 0.86 | 0 | 0.50 |
| Bone Marrow | hsa-miR-520g    | fludrocortisone   | rimexolone      | 0.80 | 0 | 0.00 |
| Bone Marrow | hsa-miR-520g    | finasteride       | medrysone       | 0.68 | 0 | 0.00 |
| Bone Marrow | hsa-miR-520g    | finasteride       | rimexolone      | 0.64 | 0 | 0.00 |
| Bone Marrow | hsa-miR-520g    | estradiol         | rimexolone      | 0.62 | 0 | 0.00 |
| Bone Marrow | hsa-miR-520g    | midodrine         | doxazosin       | 0.00 | 1 | 1.00 |
| Bone Marrow | hsa-miR-520g    | midodrine         | trazodone       | 0.00 | 0 | 1.00 |
| Bone Marrow | hsa-miR-520g    | nadolol           | timolol         | 0.00 | 0 | 1.00 |
| Bone Marrow | hsa-miR-520g    | trazodone         | cetirizine      | 0.00 | 1 | 1.00 |
| Bone Marrow | hsa-miR-520g    | trazodone         | doxazosin       | 0.00 | 1 | 0.67 |
| Bone Marrow | hsa-miR-520g    | amiodarone        | nadolol         | 0.00 | 1 | 0.50 |
| Bone Marrow | hsa-miR-520g    | amiodarone        | timolol         | 0.00 | 1 | 0.50 |
| Bone Marrow | hsa-miR-520g    | midodrine         | amiodarone      | 0.00 | 0 | 0.50 |
| Bone Marrow | hsa-miR-520g    | amiodarone        | bisacodyl       | 0.00 | 1 | 0.00 |
| Bone Marrow | hsa-miR-520g    | amiodarone        | bumetanide      | 0.00 | 1 | 0.00 |
| Bone Marrow | hsa-miR-520g    | amiodarone        | diltiazem       | 0.00 | 1 | 0.00 |
| Bone Marrow | hsa-miR-520g    | amiodarone        | doxorubicin     | 0.00 | 1 | 0.00 |
| Bone Marrow | hsa-miR-520g    | amiodarone        | fludrocortisone | 0.00 | 1 | 0.00 |
| Bone Marrow | hsa-miR-520g    | amiodarone        | trazodone       | 0.00 | 1 | 0.00 |
| Bone Marrow | hsa-miR-520g    | bisacodyl         | bumetanide      | 0.00 | 1 | 0.00 |
| Bone Marrow | hsa-miR-520g    | bisacodyl         | fludrocortisone | 0.00 | 1 | 0.00 |
| Bone Marrow | hsa-miR-520g    | bumetanide        | fludrocortisone | 0.00 | 1 | 0.00 |
| Bone Marrow | hsa-miR-520g    | bumetanide        | gentamicin      | 0.00 | 1 | 0.00 |
| Bone Marrow | hsa-miR-520g    | bumetanide        | nadolol         | 0.00 | 1 | 0.00 |
| Bone Marrow | hsa-miR-520g    | bumetanide        | timolol         | 0.00 | 1 | 0.00 |

|             |              |                 |                   |      |   |      |
|-------------|--------------|-----------------|-------------------|------|---|------|
| Bone Marrow | hsa-miR-520g | bumetanide      | trazodone         | 0.00 | 1 | 0.00 |
| Bone Marrow | hsa-miR-520g | cetirizine      | diltiazem         | 0.00 | 1 | 0.00 |
| Bone Marrow | hsa-miR-520g | cetirizine      | doxazosin         | 0.00 | 1 | 0.00 |
| Bone Marrow | hsa-miR-520g | cetirizine      | trihexyphenidyl   | 0.00 | 1 | 0.00 |
| Bone Marrow | hsa-miR-520g | cetirizine      | trimethobenzamide | 0.00 | 1 | 0.00 |
| Bone Marrow | hsa-miR-520g | dapsone         | diltiazem         | 0.00 | 1 | 0.00 |
| Bone Marrow | hsa-miR-520g | diltiazem       | doxorubicin       | 0.00 | 1 | 0.00 |
| Bone Marrow | hsa-miR-520g | diltiazem       | estradiol         | 0.00 | 1 | 0.00 |
| Bone Marrow | hsa-miR-520g | diltiazem       | finasteride       | 0.00 | 1 | 0.00 |
| Bone Marrow | hsa-miR-520g | diltiazem       | fludrocortisone   | 0.00 | 1 | 0.00 |
| Bone Marrow | hsa-miR-520g | diltiazem       | nadolol           | 0.00 | 1 | 0.00 |
| Bone Marrow | hsa-miR-520g | diltiazem       | timolol           | 0.00 | 1 | 0.00 |
| Bone Marrow | hsa-miR-520g | diltiazem       | trazodone         | 0.00 | 1 | 0.00 |
| Bone Marrow | hsa-miR-520g | doxazosin       | fludrocortisone   | 0.00 | 1 | 0.00 |
| Bone Marrow | hsa-miR-520g | doxazosin       | nadolol           | 0.00 | 1 | 0.00 |
| Bone Marrow | hsa-miR-520g | doxazosin       | timolol           | 0.00 | 1 | 0.00 |
| Bone Marrow | hsa-miR-520g | estradiol       | fludrocortisone   | 0.00 | 1 | 0.00 |
| Bone Marrow | hsa-miR-520g | fludrocortisone | midodrine         | 0.00 | 1 | 0.00 |
| Bone Marrow | hsa-miR-520g | fludrocortisone | nadolol           | 0.00 | 1 | 0.00 |
| Bone Marrow | hsa-miR-520g | fludrocortisone | timolol           | 0.00 | 1 | 0.00 |
| Bone Marrow | hsa-miR-520g | midodrine       | nadolol           | 0.00 | 1 | 0.00 |
| Bone Marrow | hsa-miR-520g | midodrine       | timolol           | 0.00 | 1 | 0.00 |
| Bone Marrow | hsa-miR-520g | nadolol         | trazodone         | 0.00 | 1 | 0.00 |
| Bone Marrow | hsa-miR-520g | nadolol         | trihexyphenidyl   | 0.00 | 1 | 0.00 |
| Bone Marrow | hsa-miR-520g | timolol         | trazodone         | 0.00 | 1 | 0.00 |
| Bone Marrow | hsa-miR-520g | timolol         | trihexyphenidyl   | 0.00 | 1 | 0.00 |
| Bone Marrow | hsa-miR-520g | trazodone       | trihexyphenidyl   | 0.00 | 1 | 0.00 |
| Bone Marrow | hsa-miR-520g | trazodone       | trimethobenzamide | 0.00 | 1 | 0.00 |
| Bone Marrow | hsa-miR-520h | fludrocortisone | medrysone         | 0.86 | 0 | 0.00 |
| Bone Marrow | hsa-miR-520h | medrysone       | rimexolone        | 0.86 | 0 | 0.50 |
| Bone Marrow | hsa-miR-520h | fludrocortisone | rimexolone        | 0.80 | 0 | 0.00 |
| Bone Marrow | hsa-miR-520h | medrysone       | Prestwick-692     | 0.70 | 0 | 0.00 |
| Bone Marrow | hsa-miR-520h | etiocholanolone | Prestwick-692     | 0.68 | 0 | 0.00 |
| Bone Marrow | hsa-miR-520h | finasteride     | medrysone         | 0.68 | 0 | 0.00 |
| Bone Marrow | hsa-miR-520h | etiocholanolone | fludrocortisone   | 0.66 | 0 | 0.00 |
| Bone Marrow | hsa-miR-520h | etiocholanolone | rimexolone        | 0.66 | 0 | 0.00 |
| Bone Marrow | hsa-miR-520h | fludrocortisone | Prestwick-692     | 0.66 | 0 | 0.00 |
| Bone Marrow | hsa-miR-520h | etiocholanolone | medrysone         | 0.64 | 0 | 0.00 |
| Bone Marrow | hsa-miR-520h | finasteride     | rimexolone        | 0.64 | 0 | 0.00 |
| Bone Marrow | hsa-miR-520h | estradiol       | rimexolone        | 0.62 | 0 | 0.00 |
| Bone Marrow | hsa-miR-520h | Prestwick-692   | rimexolone        | 0.61 | 0 | 0.00 |
| Bone Marrow | hsa-miR-520h | genistein       | apigenin          | 0.60 | 0 | 0.00 |
| Bone Marrow | hsa-miR-520h | diphenhydramine | trazodone         | 0.00 | 1 | 1.00 |
| Bone Marrow | hsa-miR-520h | genistein       | doxorubicin       | 0.00 | 0 | 1.00 |

|             |                 |                     |                   |      |   |      |
|-------------|-----------------|---------------------|-------------------|------|---|------|
| Bone Marrow | hsa-miR-520h    | nadolol             | timolol           | 0.00 | 0 | 1.00 |
| Bone Marrow | hsa-miR-520h    | trazodone           | doxazosin         | 0.00 | 1 | 0.67 |
| Bone Marrow | hsa-miR-520h    | amiodarone          | nadolol           | 0.00 | 1 | 0.50 |
| Bone Marrow | hsa-miR-520h    | amiodarone          | timolol           | 0.00 | 1 | 0.50 |
| Bone Marrow | hsa-miR-520h    | dipyridamole        | roxithromycin     | 0.00 | 0 | 0.50 |
| Bone Marrow | hsa-miR-520h    | amiodarone          | bisacodyl         | 0.00 | 1 | 0.00 |
| Bone Marrow | hsa-miR-520h    | amiodarone          | doxorubicin       | 0.00 | 1 | 0.00 |
| Bone Marrow | hsa-miR-520h    | amiodarone          | fludrocortisone   | 0.00 | 1 | 0.00 |
| Bone Marrow | hsa-miR-520h    | amiodarone          | metronidazole     | 0.00 | 1 | 0.00 |
| Bone Marrow | hsa-miR-520h    | amiodarone          | trazodone         | 0.00 | 1 | 0.00 |
| Bone Marrow | hsa-miR-520h    | bisacodyl           | fludrocortisone   | 0.00 | 1 | 0.00 |
| Bone Marrow | hsa-miR-520h    | dapsone             | metronidazole     | 0.00 | 1 | 0.00 |
| Bone Marrow | hsa-miR-520h    | diphenhydramine     | doxazosin         | 0.00 | 1 | 0.00 |
| Bone Marrow | hsa-miR-520h    | diphenhydramine     | guanadrel         | 0.00 | 1 | 0.00 |
| Bone Marrow | hsa-miR-520h    | diphenhydramine     | nadolol           | 0.00 | 1 | 0.00 |
| Bone Marrow | hsa-miR-520h    | diphenhydramine     | timolol           | 0.00 | 1 | 0.00 |
| Bone Marrow | hsa-miR-520h    | dipyridamole        | doxorubicin       | 0.00 | 1 | 0.00 |
| Bone Marrow | hsa-miR-520h    | doxazosin           | fludrocortisone   | 0.00 | 1 | 0.00 |
| Bone Marrow | hsa-miR-520h    | doxazosin           | nadolol           | 0.00 | 1 | 0.00 |
| Bone Marrow | hsa-miR-520h    | doxazosin           | timolol           | 0.00 | 1 | 0.00 |
| Bone Marrow | hsa-miR-520h    | estradiol           | fludrocortisone   | 0.00 | 1 | 0.00 |
| Bone Marrow | hsa-miR-520h    | fludrocortisone     | guanadrel         | 0.00 | 1 | 0.00 |
| Bone Marrow | hsa-miR-520h    | fludrocortisone     | nadolol           | 0.00 | 1 | 0.00 |
| Bone Marrow | hsa-miR-520h    | fludrocortisone     | timolol           | 0.00 | 1 | 0.00 |
| Bone Marrow | hsa-miR-520h    | guanadrel           | nadolol           | 0.00 | 1 | 0.00 |
| Bone Marrow | hsa-miR-520h    | guanadrel           | timolol           | 0.00 | 1 | 0.00 |
| Bone Marrow | hsa-miR-520h    | guanadrel           | trazodone         | 0.00 | 1 | 0.00 |
| Bone Marrow | hsa-miR-520h    | nadolol             | trazodone         | 0.00 | 1 | 0.00 |
| Bone Marrow | hsa-miR-520h    | timolol             | trazodone         | 0.00 | 1 | 0.00 |
| Bone Marrow | hsa-miR-548a-5p | clomipramine        | trimethobenzamide | 0.00 | 1 | 0.00 |
| Bone Marrow | hsa-miR-548b-3p | fludrocortisone     | noretynodrel      | 0.75 | 0 | 0.00 |
| Bone Marrow | hsa-miR-548b-3p | nicotinic acid      | pyrazinamide      | 0.64 | 0 | 0.00 |
| Bone Marrow | hsa-miR-548b-3p | cycloserine         | isoniazid         | 0.00 | 1 | 0.00 |
| Bone Marrow | hsa-miR-548b-3p | fludrocortisone     | isoniazid         | 0.00 | 1 | 0.00 |
| Bone Marrow | hsa-miR-548b-3p | fludrocortisone     | repaglinide       | 0.00 | 1 | 0.00 |
| Bone Marrow | hsa-miR-548b-3p | isoniazid           | metronidazole     | 0.00 | 1 | 0.00 |
| Bone Marrow | hsa-miR-548b-3p | isoniazid           | repaglinide       | 0.00 | 1 | 0.00 |
| Bone Marrow | hsa-miR-548b-3p | liothyronine        | repaglinide       | 0.00 | 1 | 0.00 |
| Bone Marrow | hsa-miR-548d-3p | roxithromycin       | vinblastine       | 0.00 | 0 | 0.50 |
| Bone Marrow | hsa-miR-548d-5p | medrysone           | Prestwick-692     | 0.70 | 0 | 0.00 |
| Bone Marrow | hsa-miR-548d-5p | 3-acetamidocoumarin | 3-acetylcoumarin  | 0.61 | 0 | 0.00 |
| Bone Marrow | hsa-miR-548d-5p | amitriptyline       | clomipramine      | 0.00 | 1 | 0.50 |
| Bone Marrow | hsa-miR-548d-5p | amitriptyline       | doxorubicin       | 0.00 | 1 | 0.00 |

|             |                 |                     |                    |      |   |      |
|-------------|-----------------|---------------------|--------------------|------|---|------|
| Bone Marrow | hsa-miR-548d-5p | amitriptyline       | ethosuximide       | 0.00 | 1 | 0.00 |
| Bone Marrow | hsa-miR-548d-5p | amitriptyline       | penbutolol         | 0.00 | 1 | 0.00 |
| Bone Marrow | hsa-miR-548d-5p | amitriptyline       | verteporfin        | 0.00 | 1 | 0.00 |
| Bone Marrow | hsa-miR-548d-5p | clomipramine        | doxorubicin        | 0.00 | 1 | 0.00 |
| Bone Marrow | hsa-miR-548d-5p | clomipramine        | ethosuximide       | 0.00 | 1 | 0.00 |
| Bone Marrow | hsa-miR-548d-5p | clomipramine        | penbutolol         | 0.00 | 1 | 0.00 |
| Bone Marrow | hsa-miR-548n    | isoflupredone       | rimexolone         | 0.80 | 0 | 0.00 |
| Bone Marrow | hsa-miR-548n    | finasteride         | isoflupredone      | 0.64 | 0 | 0.00 |
| Bone Marrow | hsa-miR-548n    | finasteride         | rimexolone         | 0.64 | 0 | 0.00 |
| Bone Marrow | hsa-miR-548n    | rimexolone          | alpha-estradiol    | 0.62 | 0 | 0.00 |
| Bone Marrow | hsa-miR-548n    | 3-acetamidocoumarin | scopoletin         | 0.61 | 0 | 0.00 |
| Bone Marrow | hsa-miR-548n    | guanethidine        | doxazosin          | 0.00 | 0 | 1.00 |
| Bone Marrow | hsa-miR-548n    | apomorphine         | doxazosin          | 0.00 | 1 | 0.00 |
| Bone Marrow | hsa-miR-548n    | apomorphine         | etomidate          | 0.00 | 1 | 0.00 |
| Bone Marrow | hsa-miR-548n    | apomorphine         | guanethidine       | 0.00 | 1 | 0.00 |
| Bone Marrow | hsa-miR-548n    | apomorphine         | penbutolol         | 0.00 | 1 | 0.00 |
| Bone Marrow | hsa-miR-548n    | apomorphine         | tacrolimus         | 0.00 | 1 | 0.00 |
| Bone Marrow | hsa-miR-548n    | cetirizine          | doxazosin          | 0.00 | 1 | 0.00 |
| Bone Marrow | hsa-miR-548n    | doxazosin           | penbutolol         | 0.00 | 1 | 0.00 |
| Bone Marrow | hsa-miR-548n    | doxazosin           | verteporfin        | 0.00 | 1 | 0.00 |
| Bone Marrow | hsa-miR-548n    | finasteride         | tacrolimus         | 0.00 | 1 | 0.00 |
| Bone Marrow | hsa-miR-548n    | guanethidine        | penbutolol         | 0.00 | 1 | 0.00 |
| Bone Marrow | hsa-miR-548n    | guanethidine        | verteporfin        | 0.00 | 1 | 0.00 |
| Bone Marrow | hsa-miR-548n    | tretinoin           | verteporfin        | 0.00 | 1 | 0.00 |
| Bone Marrow | hsa-miR-570     | sulfadimethoxine    | sulfamonomethoxine | 0.90 | 0 | 0.00 |
| Bone Marrow | hsa-miR-570     | myricetin           | apigenin           | 0.87 | 0 | 0.00 |
| Bone Marrow | hsa-miR-570     | nadolol             | penbutolol         | 0.87 | 0 | 1.00 |
| Bone Marrow | hsa-miR-570     | isoflupredone       | medrysone          | 0.86 | 0 | 0.00 |
| Bone Marrow | hsa-miR-570     | medrysone           | rimexolone         | 0.86 | 0 | 0.50 |
| Bone Marrow | hsa-miR-570     | Prestwick-983       | thioguanosine      | 0.86 | 0 | 0.00 |
| Bone Marrow | hsa-miR-570     | isoflupredone       | rimexolone         | 0.80 | 0 | 0.00 |
| Bone Marrow | hsa-miR-570     | medrysone           | Prestwick-692      | 0.70 | 0 | 0.00 |
| Bone Marrow | hsa-miR-570     | etiocholanolone     | Prestwick-692      | 0.68 | 0 | 0.00 |
| Bone Marrow | hsa-miR-570     | finasteride         | medrysone          | 0.68 | 0 | 0.00 |
| Bone Marrow | hsa-miR-570     | etiocholanolone     | rimexolone         | 0.66 | 0 | 0.00 |
| Bone Marrow | hsa-miR-570     | etiocholanolone     | medrysone          | 0.64 | 0 | 0.00 |
| Bone Marrow | hsa-miR-570     | finasteride         | isoflupredone      | 0.64 | 0 | 0.00 |
| Bone Marrow | hsa-miR-570     | finasteride         | rimexolone         | 0.64 | 0 | 0.00 |
| Bone Marrow | hsa-miR-570     | 3-acetamidocoumarin | milrinone          | 0.63 | 0 | 0.00 |
| Bone Marrow | hsa-miR-570     | penbutolol          | pindolol           | 0.62 | 0 | 0.67 |
| Bone Marrow | hsa-miR-570     | isoflupredone       | Prestwick-692      | 0.61 | 0 | 0.00 |

|             |             |                 |                  |      |   |      |
|-------------|-------------|-----------------|------------------|------|---|------|
| Bone Marrow | hsa-miR-570 | Prestwick-692   | rimexolone       | 0.61 | 0 | 0.00 |
| Bone Marrow | hsa-miR-570 | genistein       | apigenin         | 0.60 | 0 | 0.00 |
| Bone Marrow | hsa-miR-570 | nadolol         | pindolol         | 0.60 | 0 | 1.00 |
| Bone Marrow | hsa-miR-570 | gliclazide      | repaglinide      | 0.00 | 0 | 0.67 |
| Bone Marrow | hsa-miR-570 | bepriidil       | phenoxybenzamine | 0.00 | 0 | 0.50 |
| Bone Marrow | hsa-miR-570 | bepriidil       | chlorpromazine   | 0.00 | 1 | 0.00 |
| Bone Marrow | hsa-miR-570 | bepriidil       | diphenhydramine  | 0.00 | 1 | 0.00 |
| Bone Marrow | hsa-miR-570 | bepriidil       | fenopufen        | 0.00 | 1 | 0.00 |
| Bone Marrow | hsa-miR-570 | bepriidil       | nadolol          | 0.00 | 1 | 0.00 |
| Bone Marrow | hsa-miR-570 | bepriidil       | penbutolol       | 0.00 | 1 | 0.00 |
| Bone Marrow | hsa-miR-570 | bepriidil       | pindolol         | 0.00 | 1 | 0.00 |
| Bone Marrow | hsa-miR-570 | bepriidil       | verteporfin      | 0.00 | 1 | 0.00 |
| Bone Marrow | hsa-miR-570 | biperiden       | chlorpromazine   | 0.00 | 1 | 0.00 |
| Bone Marrow | hsa-miR-570 | biperiden       | diphenhydramine  | 0.00 | 1 | 0.00 |
| Bone Marrow | hsa-miR-570 | biperiden       | nadolol          | 0.00 | 1 | 0.00 |
| Bone Marrow | hsa-miR-570 | biperiden       | penbutolol       | 0.00 | 1 | 0.00 |
| Bone Marrow | hsa-miR-570 | biperiden       | pindolol         | 0.00 | 1 | 0.00 |
| Bone Marrow | hsa-miR-570 | chlorpromazine  | diphenhydramine  | 0.00 | 1 | 0.00 |
| Bone Marrow | hsa-miR-570 | chlorpromazine  | guanabenz        | 0.00 | 1 | 0.00 |
| Bone Marrow | hsa-miR-570 | chlorpromazine  | nadolol          | 0.00 | 1 | 0.00 |
| Bone Marrow | hsa-miR-570 | chlorpromazine  | penbutolol       | 0.00 | 1 | 0.00 |
| Bone Marrow | hsa-miR-570 | chlorpromazine  | phenoxybenzamine | 0.00 | 1 | 0.00 |
| Bone Marrow | hsa-miR-570 | chlorpromazine  | pindolol         | 0.00 | 1 | 0.00 |
| Bone Marrow | hsa-miR-570 | chlorpromazine  | repaglinide      | 0.00 | 1 | 0.00 |
| Bone Marrow | hsa-miR-570 | chlorpromazine  | verteporfin      | 0.00 | 1 | 0.00 |
| Bone Marrow | hsa-miR-570 | dapsone         | isoniazid        | 0.00 | 1 | 0.00 |
| Bone Marrow | hsa-miR-570 | diphenhydramine | guanabenz        | 0.00 | 1 | 0.00 |
| Bone Marrow | hsa-miR-570 | diphenhydramine | nadolol          | 0.00 | 1 | 0.00 |
| Bone Marrow | hsa-miR-570 | diphenhydramine | penbutolol       | 0.00 | 1 | 0.00 |
| Bone Marrow | hsa-miR-570 | diphenhydramine | phenoxybenzamine | 0.00 | 1 | 0.00 |
| Bone Marrow | hsa-miR-570 | diphenhydramine | pindolol         | 0.00 | 1 | 0.00 |
| Bone Marrow | hsa-miR-570 | fenopufen       | nadolol          | 0.00 | 1 | 0.00 |
| Bone Marrow | hsa-miR-570 | fenopufen       | penbutolol       | 0.00 | 1 | 0.00 |
| Bone Marrow | hsa-miR-570 | fenopufen       | pindolol         | 0.00 | 1 | 0.00 |
| Bone Marrow | hsa-miR-570 | fenopufen       | repaglinide      | 0.00 | 1 | 0.00 |
| Bone Marrow | hsa-miR-570 | fenopufen       | tobramycin       | 0.00 | 1 | 0.00 |
| Bone Marrow | hsa-miR-570 | fenopufen       | verteporfin      | 0.00 | 1 | 0.00 |
| Bone Marrow | hsa-miR-570 | guanabenz       | verteporfin      | 0.00 | 1 | 0.00 |
| Bone Marrow | hsa-miR-570 | isoniazid       | repaglinide      | 0.00 | 1 | 0.00 |
| Bone Marrow | hsa-miR-570 | methazolamide   | repaglinide      | 0.00 | 1 | 0.00 |
| Bone Marrow | hsa-miR-570 | nadolol         | phenoxybenzamine | 0.00 | 1 | 0.00 |
| Bone Marrow | hsa-miR-570 | nadolol         | repaglinide      | 0.00 | 1 | 0.00 |
| Bone Marrow | hsa-miR-570 | penbutolol      | phenoxybenzamine | 0.00 | 1 | 0.00 |
| Bone Marrow | hsa-miR-570 | penbutolol      | repaglinide      | 0.00 | 1 | 0.00 |

|             |                |                    |                  |      |   |      |
|-------------|----------------|--------------------|------------------|------|---|------|
| Bone Marrow | hsa-miR-570    | phenoxybenzamine   | pindolol         | 0.00 | 1 | 0.00 |
| Bone Marrow | hsa-miR-570    | pindolol           | repaglinide      | 0.00 | 1 | 0.00 |
| Bone Marrow | hsa-miR-590-3p | fenoprofen         | nadolol          | 0.00 | 1 | 0.00 |
| Bone Marrow | hsa-miR-590-3p | fenoprofen         | verteporfin      | 0.00 | 1 | 0.00 |
| Bone Marrow | hsa-miR-624    | fludrocortisone    | isoflupredone    | 1.00 | 0 | 0.00 |
| Bone Marrow | hsa-miR-624    | estriol            | alpha-estradiol  | 0.95 | 0 | 0.00 |
| Bone Marrow | hsa-miR-624    | fludrocortisone    | progesterone     | 0.85 | 0 | 0.00 |
| Bone Marrow | hsa-miR-624    | isoflupredone      | progesterone     | 0.85 | 0 | 0.00 |
| Bone Marrow | hsa-miR-624    | fludrocortisone    | budesonide       | 0.81 | 0 | 0.00 |
| Bone Marrow | hsa-miR-624    | isoflupredone      | budesonide       | 0.81 | 0 | 0.00 |
| Bone Marrow | hsa-miR-624    | levonorgestrel     | progesterone     | 0.77 | 0 | 1.00 |
| Bone Marrow | hsa-miR-624    | etiocholanolone    | levonorgestrel   | 0.76 | 0 | 0.00 |
| Bone Marrow | hsa-miR-624    | etiocholanolone    | progesterone     | 0.76 | 0 | 0.00 |
| Bone Marrow | hsa-miR-624    | progesterone       | budesonide       | 0.74 | 0 | 0.00 |
| Bone Marrow | hsa-miR-624    | fludrocortisone    | levonorgestrel   | 0.72 | 0 | 0.00 |
| Bone Marrow | hsa-miR-624    | isoflupredone      | levonorgestrel   | 0.72 | 0 | 0.00 |
| Bone Marrow | hsa-miR-624    | estriol            | isoflupredone    | 0.66 | 0 | 0.00 |
| Bone Marrow | hsa-miR-624    | etiocholanolone    | fludrocortisone  | 0.66 | 0 | 0.00 |
| Bone Marrow | hsa-miR-624    | levonorgestrel     | alpha-estradiol  | 0.65 | 0 | 0.00 |
| Bone Marrow | hsa-miR-624    | finasteride        | isoflupredone    | 0.64 | 0 | 0.00 |
| Bone Marrow | hsa-miR-624    | levonorgestrel     | budesonide       | 0.64 | 0 | 0.00 |
| Bone Marrow | hsa-miR-624    | norcyclobenzaprime | resveratrol      | 0.61 | 0 | 0.00 |
| Bone Marrow | hsa-miR-624    | genistein          | apigenin         | 0.60 | 0 | 0.00 |
| Bone Marrow | hsa-miR-624    | carbimazole        | propylthiouracil | 0.00 | 0 | 1.00 |
| Bone Marrow | hsa-miR-624    | genistein          | doxorubicin      | 0.00 | 0 | 1.00 |
| Bone Marrow | hsa-miR-624    | isoniazid          | vigabatrin       | 0.00 | 0 | 1.00 |
| Bone Marrow | hsa-miR-624    | levonorgestrel     | estriol          | 0.00 | 0 | 0.50 |
| Bone Marrow | hsa-miR-624    | midodrine          | phenoxybenzamine | 0.00 | 0 | 0.50 |
| Bone Marrow | hsa-miR-624    | progesterone       | estriol          | 0.00 | 0 | 0.50 |
| Bone Marrow | hsa-miR-624    | budesonide         | guanabenz        | 0.00 | 1 | 0.00 |
| Bone Marrow | hsa-miR-624    | budesonide         | isoniazid        | 0.00 | 1 | 0.00 |
| Bone Marrow | hsa-miR-624    | budesonide         | vigabatrin       | 0.00 | 1 | 0.00 |
| Bone Marrow | hsa-miR-624    | dipyridamole       | doxorubicin      | 0.00 | 1 | 0.00 |
| Bone Marrow | hsa-miR-624    | dipyridamole       | verteporfin      | 0.00 | 1 | 0.00 |
| Bone Marrow | hsa-miR-624    | fludrocortisone    | guanabenz        | 0.00 | 1 | 0.00 |
| Bone Marrow | hsa-miR-624    | fludrocortisone    | isoniazid        | 0.00 | 1 | 0.00 |
| Bone Marrow | hsa-miR-624    | fludrocortisone    | midodrine        | 0.00 | 1 | 0.00 |
| Bone Marrow | hsa-miR-624    | guanabenz          | verteporfin      | 0.00 | 1 | 0.00 |
| Bone Marrow | hsa-miR-641    | isoflupredone      | rimexolone       | 0.80 | 0 | 0.00 |
| Bone Marrow | hsa-miR-641    | norcyclobenzaprime | resveratrol      | 0.61 | 0 | 0.00 |
| Bone Marrow | hsa-miR-768-3p | isoflupredone      | medrysone        | 0.86 | 0 | 0.00 |

|             |                 |                       |                  |      |   |      |
|-------------|-----------------|-----------------------|------------------|------|---|------|
| Bone Marrow | hsa-miR-768-3p  | chenodeoxycholic acid | medrysone        | 0.66 | 0 | 0.00 |
| Bone Marrow | hsa-miR-768-3p  | camptothecin          | irinotecan       | 0.60 | 0 | 1.00 |
| Bone Marrow | hsa-miR-768-3p  | amiodarone            | phenoxybenzamine | 0.00 | 0 | 0.50 |
| Bone Marrow | hsa-miR-768-3p  | amiodarone            | clomipramine     | 0.00 | 1 | 0.00 |
| Bone Marrow | hsa-miR-768-3p  | clomipramine          | diphenhydramine  | 0.00 | 1 | 0.00 |
| Bone Marrow | hsa-miR-768-3p  | clomipramine          | estradiol        | 0.00 | 1 | 0.00 |
| Bone Marrow | hsa-miR-768-3p  | clomipramine          | guanabenz        | 0.00 | 1 | 0.00 |
| Bone Marrow | hsa-miR-768-3p  | clomipramine          | phenoxybenzamine | 0.00 | 1 | 0.00 |
| Bone Marrow | hsa-miR-768-3p  | diphenhydramine       | guanabenz        | 0.00 | 1 | 0.00 |
| Bone Marrow | hsa-miR-768-3p  | diphenhydramine       | phenoxybenzamine | 0.00 | 1 | 0.00 |
| Bone Marrow | hsa-miR-802     | fludrocortisone       | rimexolone       | 0.80 | 0 | 0.00 |
| Bone Marrow | hsa-miR-802     | amiodarone            | nadolol          | 0.00 | 1 | 0.50 |
| Bone Marrow | hsa-miR-802     | amiodarone            | fludrocortisone  | 0.00 | 1 | 0.00 |
| Bone Marrow | hsa-miR-802     | fludrocortisone       | nadolol          | 0.00 | 1 | 0.00 |
| Colon       | hsa-miR-26b     | geldanamycin          | tanespimycin     | 0.86 | 0 | 0.00 |
| Gastric     | hsa-miR-199a-3p | felodipine            | metronidazole    | 0.00 | 1 | 0.00 |
| Gastric     | hsa-miR-212     | trazodone             | phenoxybenzamine | 0.00 | 1 | 0.50 |
| Gastric     | hsa-miR-212     | phenoxybenzamine      | tretinoin        | 0.00 | 1 | 0.00 |
| Gastric     | hsa-miR-212     | trazodone             | tretinoin        | 0.00 | 1 | 0.00 |
| Gastric     | hsa-miR-483-3p  | hecogenin             | solasodine       | 0.91 | 0 | 0.00 |
| Gastric     | hsa-miR-483-3p  | desoxycortone         | solasodine       | 0.69 | 0 | 0.00 |
| Gastric     | hsa-miR-483-3p  | desoxycortone         | hecogenin        | 0.67 | 0 | 0.00 |
| Gastric     | hsa-miR-483-3p  | fluphenazine          | thioridazine     | 0.62 | 1 | 0.67 |
| Gastric     | hsa-miR-483-3p  | fluphenazine          | apomorphine      | 0.00 | 1 | 0.67 |
| Gastric     | hsa-miR-483-3p  | thioridazine          | apomorphine      | 0.00 | 1 | 0.50 |
| Gastric     | hsa-miR-483-3p  | apomorphine           | cetirizine       | 0.00 | 1 | 0.00 |
| Gastric     | hsa-miR-483-3p  | apomorphine           | disulfiram       | 0.00 | 1 | 0.00 |
| Gastric     | hsa-miR-483-3p  | apomorphine           | flavoxate        | 0.00 | 1 | 0.00 |
| Gastric     | hsa-miR-483-3p  | apomorphine           | isocarboxazid    | 0.00 | 1 | 0.00 |
| Gastric     | hsa-miR-483-3p  | apomorphine           | ivermectin       | 0.00 | 1 | 0.00 |
| Gastric     | hsa-miR-483-3p  | apomorphine           | lisinopril       | 0.00 | 1 | 0.00 |
| Gastric     | hsa-miR-483-3p  | apomorphine           | phentolamine     | 0.00 | 1 | 0.00 |
| Gastric     | hsa-miR-483-3p  | apomorphine           | sirolimus        | 0.00 | 1 | 0.00 |
| Gastric     | hsa-miR-483-3p  | apomorphine           | terazosin        | 0.00 | 1 | 0.00 |
| Gastric     | hsa-miR-483-3p  | apomorphine           | trimethadione    | 0.00 | 1 | 0.00 |
| Gastric     | hsa-miR-483-3p  | cetirizine            | disulfiram       | 0.00 | 1 | 0.00 |
| Gastric     | hsa-miR-483-3p  | cetirizine            | flavoxate        | 0.00 | 1 | 0.00 |
| Gastric     | hsa-miR-483-3p  | cetirizine            | fluphenazine     | 0.00 | 1 | 0.00 |
| Gastric     | hsa-miR-483-3p  | cetirizine            | isocarboxazid    | 0.00 | 1 | 0.00 |
| Gastric     | hsa-miR-483-3p  | cetirizine            | ivermectin       | 0.00 | 1 | 0.00 |
| Gastric     | hsa-miR-483-3p  | cetirizine            | lisinopril       | 0.00 | 1 | 0.00 |
| Gastric     | hsa-miR-483-3p  | cetirizine            | phentolamine     | 0.00 | 1 | 0.00 |

|         |                |               |               |      |   |      |
|---------|----------------|---------------|---------------|------|---|------|
| Gastric | hsa-miR-483-3p | cetirizine    | sirolimus     | 0.00 | 1 | 0.00 |
| Gastric | hsa-miR-483-3p | cetirizine    | terazosin     | 0.00 | 1 | 0.00 |
| Gastric | hsa-miR-483-3p | cetirizine    | thioridazine  | 0.00 | 1 | 0.00 |
| Gastric | hsa-miR-483-3p | cetirizine    | trimethadione | 0.00 | 1 | 0.00 |
| Gastric | hsa-miR-483-3p | disulfiram    | flavoxate     | 0.00 | 1 | 0.00 |
| Gastric | hsa-miR-483-3p | disulfiram    | fluphenazine  | 0.00 | 1 | 0.00 |
| Gastric | hsa-miR-483-3p | disulfiram    | isocarboxazid | 0.00 | 1 | 0.00 |
| Gastric | hsa-miR-483-3p | disulfiram    | ivermectin    | 0.00 | 1 | 0.00 |
| Gastric | hsa-miR-483-3p | disulfiram    | lisinopril    | 0.00 | 1 | 0.00 |
| Gastric | hsa-miR-483-3p | disulfiram    | phentolamine  | 0.00 | 1 | 0.00 |
| Gastric | hsa-miR-483-3p | disulfiram    | sirolimus     | 0.00 | 1 | 0.00 |
| Gastric | hsa-miR-483-3p | disulfiram    | terazosin     | 0.00 | 1 | 0.00 |
| Gastric | hsa-miR-483-3p | disulfiram    | thioridazine  | 0.00 | 1 | 0.00 |
| Gastric | hsa-miR-483-3p | disulfiram    | trimethadione | 0.00 | 1 | 0.00 |
| Gastric | hsa-miR-483-3p | flavoxate     | fluphenazine  | 0.00 | 1 | 0.00 |
| Gastric | hsa-miR-483-3p | flavoxate     | isocarboxazid | 0.00 | 1 | 0.00 |
| Gastric | hsa-miR-483-3p | flavoxate     | ivermectin    | 0.00 | 1 | 0.00 |
| Gastric | hsa-miR-483-3p | flavoxate     | lisinopril    | 0.00 | 1 | 0.00 |
| Gastric | hsa-miR-483-3p | flavoxate     | phentolamine  | 0.00 | 1 | 0.00 |
| Gastric | hsa-miR-483-3p | flavoxate     | sirolimus     | 0.00 | 1 | 0.00 |
| Gastric | hsa-miR-483-3p | flavoxate     | terazosin     | 0.00 | 1 | 0.00 |
| Gastric | hsa-miR-483-3p | flavoxate     | thioridazine  | 0.00 | 1 | 0.00 |
| Gastric | hsa-miR-483-3p | flavoxate     | trimethadione | 0.00 | 1 | 0.00 |
| Gastric | hsa-miR-483-3p | fluphenazine  | isocarboxazid | 0.00 | 1 | 0.00 |
| Gastric | hsa-miR-483-3p | fluphenazine  | ivermectin    | 0.00 | 1 | 0.00 |
| Gastric | hsa-miR-483-3p | fluphenazine  | lisinopril    | 0.00 | 1 | 0.00 |
| Gastric | hsa-miR-483-3p | fluphenazine  | phentolamine  | 0.00 | 1 | 0.00 |
| Gastric | hsa-miR-483-3p | fluphenazine  | sirolimus     | 0.00 | 1 | 0.00 |
| Gastric | hsa-miR-483-3p | fluphenazine  | terazosin     | 0.00 | 1 | 0.00 |
| Gastric | hsa-miR-483-3p | fluphenazine  | trimethadione | 0.00 | 1 | 0.00 |
| Gastric | hsa-miR-483-3p | isocarboxazid | ivermectin    | 0.00 | 1 | 0.00 |
| Gastric | hsa-miR-483-3p | isocarboxazid | lisinopril    | 0.00 | 1 | 0.00 |
| Gastric | hsa-miR-483-3p | isocarboxazid | phentolamine  | 0.00 | 1 | 0.00 |
| Gastric | hsa-miR-483-3p | isocarboxazid | sirolimus     | 0.00 | 1 | 0.00 |
| Gastric | hsa-miR-483-3p | isocarboxazid | terazosin     | 0.00 | 1 | 0.00 |
| Gastric | hsa-miR-483-3p | isocarboxazid | thioridazine  | 0.00 | 1 | 0.00 |
| Gastric | hsa-miR-483-3p | isocarboxazid | trimethadione | 0.00 | 1 | 0.00 |
| Gastric | hsa-miR-483-3p | ivermectin    | lisinopril    | 0.00 | 1 | 0.00 |
| Gastric | hsa-miR-483-3p | ivermectin    | phentolamine  | 0.00 | 1 | 0.00 |
| Gastric | hsa-miR-483-3p | ivermectin    | sirolimus     | 0.00 | 1 | 0.00 |
| Gastric | hsa-miR-483-3p | ivermectin    | terazosin     | 0.00 | 1 | 0.00 |
| Gastric | hsa-miR-483-3p | ivermectin    | thioridazine  | 0.00 | 1 | 0.00 |
| Gastric | hsa-miR-483-3p | ivermectin    | trimethadione | 0.00 | 1 | 0.00 |
| Gastric | hsa-miR-483-3p | lisinopril    | phentolamine  | 0.00 | 1 | 0.00 |

|           |                |                  |                      |      |   |      |
|-----------|----------------|------------------|----------------------|------|---|------|
| Gastric   | hsa-miR-483-3p | lisinopril       | sirolimus            | 0.00 | 1 | 0.00 |
| Gastric   | hsa-miR-483-3p | lisinopril       | terazosin            | 0.00 | 1 | 0.00 |
| Gastric   | hsa-miR-483-3p | lisinopril       | thioridazine         | 0.00 | 1 | 0.00 |
| Gastric   | hsa-miR-483-3p | lisinopril       | trimethadione        | 0.00 | 1 | 0.00 |
| Gastric   | hsa-miR-483-3p | phentolamine     | sirolimus            | 0.00 | 1 | 0.00 |
| Gastric   | hsa-miR-483-3p | phentolamine     | terazosin            | 0.00 | 1 | 0.00 |
| Gastric   | hsa-miR-483-3p | phentolamine     | thioridazine         | 0.00 | 1 | 0.00 |
| Gastric   | hsa-miR-483-3p | phentolamine     | trimethadione        | 0.00 | 1 | 0.00 |
| Gastric   | hsa-miR-483-3p | sirolimus        | terazosin            | 0.00 | 1 | 0.00 |
| Gastric   | hsa-miR-483-3p | sirolimus        | thioridazine         | 0.00 | 1 | 0.00 |
| Gastric   | hsa-miR-483-3p | sirolimus        | trimethadione        | 0.00 | 1 | 0.00 |
| Gastric   | hsa-miR-483-3p | terazosin        | thioridazine         | 0.00 | 1 | 0.00 |
| Gastric   | hsa-miR-483-3p | terazosin        | trimethadione        | 0.00 | 1 | 0.00 |
| Gastric   | hsa-miR-483-3p | thioridazine     | trimethadione        | 0.00 | 1 | 0.00 |
| Gastric   | hsa-miR-557    | doxazosin        | estradiol            | 0.00 | 1 | 0.00 |
| Gastric   | hsa-miR-557    | doxazosin        | nadolol              | 0.00 | 1 | 0.00 |
| Gastric   | hsa-miR-557    | estradiol        | nadolol              | 0.00 | 1 | 0.00 |
| Gastric   | hsa-miR-625    | sirolimus        | thioridazine         | 0.00 | 1 | 0.00 |
| Gastric   | hsa-miR-625    | sirolimus        | topiramate           | 0.00 | 1 | 0.00 |
| Gastric   | hsa-miR-625    | sirolimus        | tranexamic acid      | 0.00 | 1 | 0.00 |
| Gastric   | hsa-miR-625    | sirolimus        | tretinoin            | 0.00 | 1 | 0.00 |
| Gastric   | hsa-miR-625    | thioridazine     | topiramate           | 0.00 | 1 | 0.00 |
| Gastric   | hsa-miR-625    | thioridazine     | tranexamic acid      | 0.00 | 1 | 0.00 |
| Gastric   | hsa-miR-625    | thioridazine     | tretinoin            | 0.00 | 1 | 0.00 |
| Gastric   | hsa-miR-625    | topiramate       | tranexamic acid      | 0.00 | 1 | 0.00 |
| Gastric   | hsa-miR-625    | topiramate       | tretinoin            | 0.00 | 1 | 0.00 |
| Gastric   | hsa-miR-625    | tranexamic acid  | tretinoin            | 0.00 | 1 | 0.00 |
| Gastric   | hsa-miR-92a    | medrysone        | Prestwick-692        | 0.70 | 0 | 0.00 |
| Gastric   | hsa-miR-92a    | medrysone        | ursodeoxycholic acid | 0.66 | 0 | 0.00 |
| Gastric   | hsa-miR-92a    | Prestwick-692    | ursodeoxycholic acid | 0.64 | 0 | 0.00 |
| Gastric   | hsa-miR-92a    | doxepin          | tranexamic acid      | 0.00 | 1 | 0.00 |
| Gastric   | hsa-miR-92b    | etiocholanolone  | ursodeoxycholic acid | 0.69 | 0 | 0.00 |
| Gastric   | hsa-miR-92b    | medrysone        | ursodeoxycholic acid | 0.66 | 0 | 0.00 |
| Gastric   | hsa-miR-92b    | etiocholanolone  | medrysone            | 0.64 | 0 | 0.00 |
| Germ Cell | hsa-miR-1264   | dextromethorphan | ajmaline             | 0.69 | 0 | 0.00 |
| Germ Cell | hsa-miR-1264   | bepriidil        | chlorpromazine       | 0.00 | 1 | 0.00 |
| Germ Cell | hsa-miR-1264   | bepriidil        | finasteride          | 0.00 | 1 | 0.00 |
| Germ Cell | hsa-miR-1264   | bepriidil        | fludrocortisone      | 0.00 | 1 | 0.00 |
| Germ Cell | hsa-miR-1264   | bepriidil        | repaglinide          | 0.00 | 1 | 0.00 |

|           |                |                  |                  |      |   |      |
|-----------|----------------|------------------|------------------|------|---|------|
| Germ Cell | hsa-miR-1264   | bepiridil        | timolol          | 0.00 | 1 | 0.00 |
| Germ Cell | hsa-miR-1264   | chlorpromazine   | finasteride      | 0.00 | 1 | 0.00 |
| Germ Cell | hsa-miR-1264   | chlorpromazine   | fludrocortisone  | 0.00 | 1 | 0.00 |
| Germ Cell | hsa-miR-1264   | chlorpromazine   | repaglinide      | 0.00 | 1 | 0.00 |
| Germ Cell | hsa-miR-1264   | chlorpromazine   | timolol          | 0.00 | 1 | 0.00 |
| Germ Cell | hsa-miR-1264   | finasteride      | fludrocortisone  | 0.00 | 1 | 0.00 |
| Germ Cell | hsa-miR-1264   | finasteride      | repaglinide      | 0.00 | 1 | 0.00 |
| Germ Cell | hsa-miR-1264   | finasteride      | timolol          | 0.00 | 1 | 0.00 |
| Germ Cell | hsa-miR-1264   | fludrocortisone  | repaglinide      | 0.00 | 1 | 0.00 |
| Germ Cell | hsa-miR-1264   | fludrocortisone  | timolol          | 0.00 | 1 | 0.00 |
| Germ Cell | hsa-miR-1264   | repaglinide      | timolol          | 0.00 | 1 | 0.00 |
| Germ Cell | hsa-miR-1305   | thioridazine     | oxymetazoline    | 0.00 | 0 | 0.50 |
| Germ Cell | hsa-miR-1305   | ivermectin       | terfenadine      | 0.00 | 1 | 0.00 |
| Germ Cell | hsa-miR-1305   | ivermectin       | thioridazine     | 0.00 | 1 | 0.00 |
| Germ Cell | hsa-miR-1305   | terfenadine      | thioridazine     | 0.00 | 1 | 0.00 |
| Germ Cell | hsa-miR-1323   | sirolimus        | vorinostat       | 0.00 | 1 | 0.00 |
| Germ Cell | hsa-miR-139-5p | geldanamycin     | tanespimycin     | 0.86 | 0 | 0.00 |
| Germ Cell | hsa-miR-23b    | thioridazine     | valproic acid    | 0.00 | 1 | 0.00 |
| Germ Cell | hsa-miR-320a   | geldanamycin     | tanespimycin     | 0.86 | 0 | 0.00 |
| Germ Cell | hsa-miR-320b   | geldanamycin     | tanespimycin     | 0.86 | 0 | 0.00 |
| Germ Cell | hsa-miR-320c   | geldanamycin     | tanespimycin     | 0.86 | 0 | 0.00 |
| Germ Cell | hsa-miR-371-5p | geldanamycin     | tanespimycin     | 0.86 | 0 | 0.00 |
| Germ Cell | hsa-miR-382    | thioridazine     | vorinostat       | 0.00 | 1 | 0.00 |
| Germ Cell | hsa-miR-491-3p | chlormezanone    | thioridazine     | 0.00 | 1 | 0.00 |
| Germ Cell | hsa-miR-522    | thioridazine     | trifluoperazine  | 0.66 | 1 | 0.50 |
| Germ Cell | hsa-miR-522    | thioridazine     | valproic acid    | 0.00 | 1 | 0.00 |
| Germ Cell | hsa-miR-522    | thioridazine     | vorinostat       | 0.00 | 1 | 0.00 |
| Germ Cell | hsa-miR-522    | trifluoperazine  | valproic acid    | 0.00 | 1 | 0.00 |
| Germ Cell | hsa-miR-522    | trifluoperazine  | vorinostat       | 0.00 | 1 | 0.00 |
| Germ Cell | hsa-miR-522    | valproic acid    | vorinostat       | 0.00 | 1 | 0.00 |
| Germ Cell | hsa-miR-590-3p | rifabutin        | thioridazine     | 0.00 | 1 | 0.00 |
| Leukemia  | hsa-miR-569    | thiethylperazine | thioridazine     | 0.79 | 1 | 0.75 |
| Leukemia  | hsa-miR-873    | danazol          | pregnenolone     | 0.71 | 0 | 0.00 |
| Liver     | hsa-miR-129-5p | monobenzone      | apigenin         | 0.67 | 0 | 0.00 |
| Liver     | hsa-miR-129-5p | levonorgestrel   | alpha-estradiol  | 0.65 | 0 | 0.00 |
| Liver     | hsa-miR-129-5p | lansoprazole     | mebendazole      | 0.00 | 1 | 0.00 |
| Liver     | hsa-miR-129-5p | lansoprazole     | metronidazole    | 0.00 | 1 | 0.00 |
| Liver     | hsa-miR-129-5p | lansoprazole     | phenoxybenzamine | 0.00 | 1 | 0.00 |
| Liver     | hsa-miR-129-5p | lansoprazole     | tacrolimus       | 0.00 | 1 | 0.00 |
| Liver     | hsa-miR-129-5p | lansoprazole     | timolol          | 0.00 | 1 | 0.00 |
| Liver     | hsa-miR-129-5p | lansoprazole     | tocainide        | 0.00 | 1 | 0.00 |
| Liver     | hsa-miR-129-5p | lansoprazole     | verteporfin      | 0.00 | 1 | 0.00 |
| Liver     | hsa-miR-129-5p | mebendazole      | metronidazole    | 0.00 | 1 | 0.00 |
| Liver     | hsa-miR-129-5p | mebendazole      | phenoxybenzamine | 0.00 | 1 | 0.00 |

|       |                |                  |                  |      |   |      |
|-------|----------------|------------------|------------------|------|---|------|
| Liver | hsa-miR-129-5p | mebendazole      | tacrolimus       | 0.00 | 1 | 0.00 |
| Liver | hsa-miR-129-5p | mebendazole      | timolol          | 0.00 | 1 | 0.00 |
| Liver | hsa-miR-129-5p | mebendazole      | tocainide        | 0.00 | 1 | 0.00 |
| Liver | hsa-miR-129-5p | mebendazole      | verteporfin      | 0.00 | 1 | 0.00 |
| Liver | hsa-miR-129-5p | metronidazole    | phenoxybenzamine | 0.00 | 1 | 0.00 |
| Liver | hsa-miR-129-5p | metronidazole    | tacrolimus       | 0.00 | 1 | 0.00 |
| Liver | hsa-miR-129-5p | metronidazole    | timolol          | 0.00 | 1 | 0.00 |
| Liver | hsa-miR-129-5p | metronidazole    | tocainide        | 0.00 | 1 | 0.00 |
| Liver | hsa-miR-129-5p | metronidazole    | verteporfin      | 0.00 | 1 | 0.00 |
| Liver | hsa-miR-129-5p | phenoxybenzamine | tacrolimus       | 0.00 | 1 | 0.00 |
| Liver | hsa-miR-129-5p | phenoxybenzamine | timolol          | 0.00 | 1 | 0.00 |
| Liver | hsa-miR-129-5p | phenoxybenzamine | tocainide        | 0.00 | 1 | 0.00 |
| Liver | hsa-miR-129-5p | phenoxybenzamine | verteporfin      | 0.00 | 1 | 0.00 |
| Liver | hsa-miR-129-5p | tacrolimus       | timolol          | 0.00 | 1 | 0.00 |
| Liver | hsa-miR-129-5p | tacrolimus       | tocainide        | 0.00 | 1 | 0.00 |
| Liver | hsa-miR-129-5p | tacrolimus       | verteporfin      | 0.00 | 1 | 0.00 |
| Liver | hsa-miR-129-5p | timolol          | tocainide        | 0.00 | 1 | 0.00 |
| Liver | hsa-miR-129-5p | timolol          | verteporfin      | 0.00 | 1 | 0.00 |
| Liver | hsa-miR-129-5p | tocainide        | verteporfin      | 0.00 | 1 | 0.00 |
| Liver | hsa-miR-30a    | astemizole       | mefloquine       | 0.00 | 1 | 0.00 |
| Liver | hsa-miR-30a    | astemizole       | sirolimus        | 0.00 | 1 | 0.00 |
| Liver | hsa-miR-30a    | astemizole       | thioridazine     | 0.00 | 1 | 0.00 |
| Liver | hsa-miR-30a    | mefloquine       | sirolimus        | 0.00 | 1 | 0.00 |
| Liver | hsa-miR-30a    | mefloquine       | thioridazine     | 0.00 | 1 | 0.00 |
| Liver | hsa-miR-30a    | sirolimus        | thioridazine     | 0.00 | 1 | 0.00 |
| Liver | hsa-miR-30c    | astemizole       | phenoxybenzamine | 0.00 | 1 | 0.00 |
| Liver | hsa-miR-641    | dopamine         | nadolol          | 0.00 | 0 | 0.50 |
| Liver | hsa-miR-641    | dopamine         | gentamicin       | 0.00 | 1 | 0.00 |
| Liver | hsa-miR-641    | dopamine         | iodixanol        | 0.00 | 1 | 0.00 |
| Liver | hsa-miR-641    | dopamine         | topiramate       | 0.00 | 1 | 0.00 |
| Liver | hsa-miR-641    | dopamine         | trazodone        | 0.00 | 1 | 0.00 |
| Liver | hsa-miR-641    | dopamine         | troleandomycin   | 0.00 | 1 | 0.00 |
| Liver | hsa-miR-641    | gentamicin       | iodixanol        | 0.00 | 1 | 0.00 |
| Liver | hsa-miR-641    | gentamicin       | topiramate       | 0.00 | 1 | 0.00 |
| Liver | hsa-miR-641    | gentamicin       | trazodone        | 0.00 | 1 | 0.00 |
| Liver | hsa-miR-641    | gentamicin       | troleandomycin   | 0.00 | 1 | 0.00 |
| Liver | hsa-miR-641    | iodixanol        | topiramate       | 0.00 | 1 | 0.00 |
| Liver | hsa-miR-641    | iodixanol        | trazodone        | 0.00 | 1 | 0.00 |
| Liver | hsa-miR-641    | iodixanol        | troleandomycin   | 0.00 | 1 | 0.00 |
| Liver | hsa-miR-641    | topiramate       | trazodone        | 0.00 | 1 | 0.00 |

|          |                 |                   |                  |      |   |      |
|----------|-----------------|-------------------|------------------|------|---|------|
| Liver    | hsa-miR-641     | topiramate        | troleandomycin   | 0.00 | 1 | 0.00 |
| Liver    | hsa-miR-641     | trazodone         | troleandomycin   | 0.00 | 1 | 0.00 |
| Liver    | hsa-miR-92a     | cefalotin         | metampicillin    | 0.65 | 0 | 0.00 |
| Liver    | hsa-miR-92a     | clotrimazole      | minoxidil        | 0.00 | 1 | 0.00 |
| Liver    | hsa-miR-92a     | clotrimazole      | pergolide        | 0.00 | 1 | 0.00 |
| Liver    | hsa-miR-92a     | minoxidil         | pergolide        | 0.00 | 1 | 0.00 |
| Pancreas | hsa-miR-34c     | cephaeline        | emetine          | 0.97 | 0 | 0.00 |
| Skin     | hsa-miR-1207-3p | geldanamycin      | tanespimycin     | 0.86 | 0 | 0.00 |
| Skin     | hsa-miR-1207-3p | fluphenazine      | prochlorperazine | 0.77 | 1 | 0.67 |
| Skin     | hsa-miR-1207-3p | prochlorperazine  | thioridazine     | 0.72 | 1 | 0.75 |
| Skin     | hsa-miR-1207-3p | fluphenazine      | thioridazine     | 0.62 | 1 | 0.67 |
| Skin     | hsa-miR-1207-3p | fluphenazine      | droperidol       | 0.00 | 1 | 1.00 |
| Skin     | hsa-miR-1207-3p | prochlorperazine  | droperidol       | 0.00 | 1 | 1.00 |
| Skin     | hsa-miR-1207-3p | thioridazine      | droperidol       | 0.00 | 1 | 1.00 |
| Skin     | hsa-miR-1207-3p | geldanamycin      | rifabutin        | 0.00 | 0 | 0.50 |
| Skin     | hsa-miR-1207-3p | droperidol        | mefloquine       | 0.00 | 1 | 0.00 |
| Skin     | hsa-miR-1207-3p | droperidol        | rifabutin        | 0.00 | 1 | 0.00 |
| Skin     | hsa-miR-1207-3p | droperidol        | sirolimus        | 0.00 | 1 | 0.00 |
| Skin     | hsa-miR-1207-3p | fluphenazine      | mefloquine       | 0.00 | 1 | 0.00 |
| Skin     | hsa-miR-1207-3p | fluphenazine      | rifabutin        | 0.00 | 1 | 0.00 |
| Skin     | hsa-miR-1207-3p | fluphenazine      | sirolimus        | 0.00 | 1 | 0.00 |
| Skin     | hsa-miR-1207-3p | mefloquine        | prochlorperazine | 0.00 | 1 | 0.00 |
| Skin     | hsa-miR-1207-3p | mefloquine        | rifabutin        | 0.00 | 1 | 0.00 |
| Skin     | hsa-miR-1207-3p | mefloquine        | sirolimus        | 0.00 | 1 | 0.00 |
| Skin     | hsa-miR-1207-3p | mefloquine        | thioridazine     | 0.00 | 1 | 0.00 |
| Skin     | hsa-miR-1207-3p | prochlorperazine  | rifabutin        | 0.00 | 1 | 0.00 |
| Skin     | hsa-miR-1207-3p | prochlorperazine  | sirolimus        | 0.00 | 1 | 0.00 |
| Skin     | hsa-miR-1207-3p | rifabutin         | sirolimus        | 0.00 | 1 | 0.00 |
| Skin     | hsa-miR-1207-3p | rifabutin         | thioridazine     | 0.00 | 1 | 0.00 |
| Skin     | hsa-miR-1207-3p | sirolimus         | thioridazine     | 0.00 | 1 | 0.00 |
| Skin     | hsa-miR-450b-5p | mycophenolic acid | sirolimus        | 0.00 | 1 | 0.00 |
| Testis   | hsa-miR-500     | digoxigenin       | helveticoside    | 0.69 | 0 | 0.00 |
| Testis   | hsa-miR-500     | ranitidine        | rifabutin        | 0.00 | 1 | 0.00 |
| Testis   | hsa-miR-518f*   | bisoprolol        | bambuterol       | 0.00 | 0 | 1.00 |
| Testis   | hsa-miR-586     | ceftazidime       | tretinoin        | 0.00 | 1 | 0.00 |
| Testis   | hsa-miR-586     | ceftazidime       | valproic acid    | 0.00 | 1 | 0.00 |
| Testis   | hsa-miR-586     | ceftazidime       | vorinostat       | 0.00 | 1 | 0.00 |
| Testis   | hsa-miR-586     | tretinoin         | valproic acid    | 0.00 | 1 | 0.00 |
| Testis   | hsa-miR-586     | tretinoin         | vorinostat       | 0.00 | 1 | 0.00 |
| Testis   | hsa-miR-586     | valproic acid     | vorinostat       | 0.00 | 1 | 0.00 |
| Testis   | hsa-miR-645     | fludrocortisone   | isoflupredone    | 1.00 | 0 | 0.00 |
| Testis   | hsa-miR-645     | clomipramine      | prochlorperazine | 0.74 | 1 | 0.00 |
| Testis   | hsa-miR-645     | clomipramine      | acepromazine     | 0.73 | 0 | 0.00 |

|        |             |                     |                  |      |   |      |
|--------|-------------|---------------------|------------------|------|---|------|
| Testis | hsa-miR-645 | acepromazine        | prochlorperazine | 0.71 | 0 | 0.00 |
| Testis | hsa-miR-645 | acepromazine        | promethazine     | 0.65 | 0 | 0.00 |
| Testis | hsa-miR-645 | 3-acetamidocoumarin | milrinone        | 0.63 | 0 | 0.00 |
| Testis | hsa-miR-645 | clomipramine        | promethazine     | 0.62 | 1 | 0.00 |
| Testis | hsa-miR-645 | prochlorperazine    | promethazine     | 0.61 | 1 | 0.75 |
| Testis | hsa-miR-645 | biperiden           | promethazine     | 0.00 | 1 | 0.50 |
| Testis | hsa-miR-645 | methoxamine         | promethazine     | 0.00 | 1 | 0.50 |
| Testis | hsa-miR-645 | biperiden           | chlorphenesin    | 0.00 | 1 | 0.00 |
| Testis | hsa-miR-645 | biperiden           | clomipramine     | 0.00 | 1 | 0.00 |
| Testis | hsa-miR-645 | biperiden           | fludrocortisone  | 0.00 | 1 | 0.00 |
| Testis | hsa-miR-645 | biperiden           | iohexol          | 0.00 | 1 | 0.00 |
| Testis | hsa-miR-645 | biperiden           | lovastatin       | 0.00 | 1 | 0.00 |
| Testis | hsa-miR-645 | biperiden           | methoxamine      | 0.00 | 1 | 0.00 |
| Testis | hsa-miR-645 | biperiden           | prochlorperazine | 0.00 | 1 | 0.00 |
| Testis | hsa-miR-645 | biperiden           | ranitidine       | 0.00 | 1 | 0.00 |
| Testis | hsa-miR-645 | biperiden           | ronidazole       | 0.00 | 1 | 0.00 |
| Testis | hsa-miR-645 | biperiden           | streptomycin     | 0.00 | 1 | 0.00 |
| Testis | hsa-miR-645 | biperiden           | sulfinpyrazone   | 0.00 | 1 | 0.00 |
| Testis | hsa-miR-645 | chlorphenesin       | clomipramine     | 0.00 | 1 | 0.00 |
| Testis | hsa-miR-645 | chlorphenesin       | fludrocortisone  | 0.00 | 1 | 0.00 |
| Testis | hsa-miR-645 | chlorphenesin       | iohexol          | 0.00 | 1 | 0.00 |
| Testis | hsa-miR-645 | chlorphenesin       | lovastatin       | 0.00 | 1 | 0.00 |
| Testis | hsa-miR-645 | chlorphenesin       | methoxamine      | 0.00 | 1 | 0.00 |
| Testis | hsa-miR-645 | chlorphenesin       | prochlorperazine | 0.00 | 1 | 0.00 |
| Testis | hsa-miR-645 | chlorphenesin       | promethazine     | 0.00 | 1 | 0.00 |
| Testis | hsa-miR-645 | chlorphenesin       | ranitidine       | 0.00 | 1 | 0.00 |
| Testis | hsa-miR-645 | chlorphenesin       | ronidazole       | 0.00 | 1 | 0.00 |
| Testis | hsa-miR-645 | chlorphenesin       | streptomycin     | 0.00 | 1 | 0.00 |
| Testis | hsa-miR-645 | chlorphenesin       | sulfinpyrazone   | 0.00 | 1 | 0.00 |
| Testis | hsa-miR-645 | clomipramine        | fludrocortisone  | 0.00 | 1 | 0.00 |
| Testis | hsa-miR-645 | clomipramine        | iohexol          | 0.00 | 1 | 0.00 |
| Testis | hsa-miR-645 | clomipramine        | lovastatin       | 0.00 | 1 | 0.00 |
| Testis | hsa-miR-645 | clomipramine        | methoxamine      | 0.00 | 1 | 0.00 |
| Testis | hsa-miR-645 | clomipramine        | ranitidine       | 0.00 | 1 | 0.00 |
| Testis | hsa-miR-645 | clomipramine        | ronidazole       | 0.00 | 1 | 0.00 |
| Testis | hsa-miR-645 | clomipramine        | streptomycin     | 0.00 | 1 | 0.00 |
| Testis | hsa-miR-645 | clomipramine        | sulfinpyrazone   | 0.00 | 1 | 0.00 |
| Testis | hsa-miR-645 | fludrocortisone     | iohexol          | 0.00 | 1 | 0.00 |
| Testis | hsa-miR-645 | fludrocortisone     | lovastatin       | 0.00 | 1 | 0.00 |
| Testis | hsa-miR-645 | fludrocortisone     | methoxamine      | 0.00 | 1 | 0.00 |
| Testis | hsa-miR-645 | fludrocortisone     | prochlorperazine | 0.00 | 1 | 0.00 |
| Testis | hsa-miR-645 | fludrocortisone     | promethazine     | 0.00 | 1 | 0.00 |
| Testis | hsa-miR-645 | fludrocortisone     | ranitidine       | 0.00 | 1 | 0.00 |

|         |                |                  |                  |      |   |      |
|---------|----------------|------------------|------------------|------|---|------|
| Testis  | hsa-miR-645    | fludrocortisone  | ronidazole       | 0.00 | 1 | 0.00 |
| Testis  | hsa-miR-645    | fludrocortisone  | streptomycin     | 0.00 | 1 | 0.00 |
| Testis  | hsa-miR-645    | fludrocortisone  | sulfinpyrazone   | 0.00 | 1 | 0.00 |
| Testis  | hsa-miR-645    | iohexol          | lovastatin       | 0.00 | 1 | 0.00 |
| Testis  | hsa-miR-645    | iohexol          | methoxamine      | 0.00 | 1 | 0.00 |
| Testis  | hsa-miR-645    | iohexol          | prochlorperazine | 0.00 | 1 | 0.00 |
| Testis  | hsa-miR-645    | iohexol          | promethazine     | 0.00 | 1 | 0.00 |
| Testis  | hsa-miR-645    | iohexol          | ranitidine       | 0.00 | 1 | 0.00 |
| Testis  | hsa-miR-645    | iohexol          | ronidazole       | 0.00 | 1 | 0.00 |
| Testis  | hsa-miR-645    | iohexol          | streptomycin     | 0.00 | 1 | 0.00 |
| Testis  | hsa-miR-645    | iohexol          | sulfinpyrazone   | 0.00 | 1 | 0.00 |
| Testis  | hsa-miR-645    | lovastatin       | methoxamine      | 0.00 | 1 | 0.00 |
| Testis  | hsa-miR-645    | lovastatin       | prochlorperazine | 0.00 | 1 | 0.00 |
| Testis  | hsa-miR-645    | lovastatin       | promethazine     | 0.00 | 1 | 0.00 |
| Testis  | hsa-miR-645    | lovastatin       | ranitidine       | 0.00 | 1 | 0.00 |
| Testis  | hsa-miR-645    | lovastatin       | ronidazole       | 0.00 | 1 | 0.00 |
| Testis  | hsa-miR-645    | lovastatin       | streptomycin     | 0.00 | 1 | 0.00 |
| Testis  | hsa-miR-645    | lovastatin       | sulfinpyrazone   | 0.00 | 1 | 0.00 |
| Testis  | hsa-miR-645    | methoxamine      | prochlorperazine | 0.00 | 1 | 0.00 |
| Testis  | hsa-miR-645    | methoxamine      | ranitidine       | 0.00 | 1 | 0.00 |
| Testis  | hsa-miR-645    | methoxamine      | ronidazole       | 0.00 | 1 | 0.00 |
| Testis  | hsa-miR-645    | methoxamine      | streptomycin     | 0.00 | 1 | 0.00 |
| Testis  | hsa-miR-645    | methoxamine      | sulfinpyrazone   | 0.00 | 1 | 0.00 |
| Testis  | hsa-miR-645    | prochlorperazine | ranitidine       | 0.00 | 1 | 0.00 |
| Testis  | hsa-miR-645    | prochlorperazine | ronidazole       | 0.00 | 1 | 0.00 |
| Testis  | hsa-miR-645    | prochlorperazine | streptomycin     | 0.00 | 1 | 0.00 |
| Testis  | hsa-miR-645    | prochlorperazine | sulfinpyrazone   | 0.00 | 1 | 0.00 |
| Testis  | hsa-miR-645    | promethazine     | ranitidine       | 0.00 | 1 | 0.00 |
| Testis  | hsa-miR-645    | promethazine     | ronidazole       | 0.00 | 1 | 0.00 |
| Testis  | hsa-miR-645    | promethazine     | streptomycin     | 0.00 | 1 | 0.00 |
| Testis  | hsa-miR-645    | promethazine     | sulfinpyrazone   | 0.00 | 1 | 0.00 |
| Testis  | hsa-miR-645    | ranitidine       | ronidazole       | 0.00 | 1 | 0.00 |
| Testis  | hsa-miR-645    | ranitidine       | streptomycin     | 0.00 | 1 | 0.00 |
| Testis  | hsa-miR-645    | ranitidine       | sulfinpyrazone   | 0.00 | 1 | 0.00 |
| Testis  | hsa-miR-645    | ronidazole       | streptomycin     | 0.00 | 1 | 0.00 |
| Testis  | hsa-miR-645    | ronidazole       | sulfinpyrazone   | 0.00 | 1 | 0.00 |
| Testis  | hsa-miR-645    | streptomycin     | sulfinpyrazone   | 0.00 | 1 | 0.00 |
| Thyroid | hsa-miR-129-5p | norethisterone   | testosterone     | 0.87 | 0 | 0.00 |
| Thyroid | hsa-miR-139-5p | pregnenolone     | alfaxalone       | 0.96 | 0 | 0.00 |
| Thyroid | hsa-miR-139-5p | geldanamycin     | tanespimycin     | 0.86 | 0 | 0.00 |
| Thyroid | hsa-miR-139-5p | isoflupredone    | pregnenolone     | 0.67 | 0 | 0.00 |
| Thyroid | hsa-miR-139-5p | estriol          | isoflupredone    | 0.66 | 0 | 0.00 |
| Thyroid | hsa-miR-139-5p | lomustine        | streptozocin     | 0.65 | 0 | 0.00 |
| Thyroid | hsa-miR-139-5p | 2-deoxy-D-gluco  | streptozocin     | 0.61 | 0 | 0.00 |

|         |                | se              |                 |      |   |      |
|---------|----------------|-----------------|-----------------|------|---|------|
| Thyroid | hsa-miR-139-5p | astemizole      | clemastine      | 0.00 | 0 | 1.00 |
| Thyroid | hsa-miR-139-5p | astemizole      | diphenhydramine | 0.00 | 0 | 1.00 |
| Thyroid | hsa-miR-139-5p | astemizole      | sotalol         | 0.00 | 0 | 1.00 |
| Thyroid | hsa-miR-139-5p | carbamazepine   | tocainide       | 0.00 | 0 | 1.00 |
| Thyroid | hsa-miR-139-5p | diphenhydramine | clemastine      | 0.00 | 0 | 1.00 |
| Thyroid | hsa-miR-139-5p | deferoxamine    | streptomycin    | 0.00 | 1 | 0.00 |
| Thyroid | hsa-miR-19a    | ajmaline        | vinburnine      | 0.77 | 0 | 0.00 |
| Thyroid | hsa-miR-23b    | biperiden       | tretinoin       | 0.00 | 1 | 0.00 |
| Thyroid | hsa-miR-301b   | estriol         | alpha-estradiol | 0.95 | 0 | 0.00 |
| Thyroid | hsa-miR-32     | memantine       | securinine      | 0.61 | 0 | 0.00 |
| Tongue  | hsa-miR-1179   | clofibrate      | diazoxide       | 0.00 | 1 | 0.00 |
| Tongue  | hsa-miR-1279   | midodrine       | nadolol         | 0.00 | 1 | 0.00 |
| Tongue  | hsa-miR-1279   | midodrine       | oxaprozin       | 0.00 | 1 | 0.00 |
| Tongue  | hsa-miR-1279   | nadolol         | oxaprozin       | 0.00 | 1 | 0.00 |
| Tongue  | hsa-miR-128b   | carbamazepine   | sirolimus       | 0.00 | 1 | 0.00 |
| Tongue  | hsa-miR-490-5p | luteolin        | apigenin        | 0.95 | 0 | 0.00 |
| Tongue  | hsa-miR-510    | piperidolate    | adiphenine      | 0.96 | 0 | 0.00 |
| Tongue  | hsa-miR-510    | nadolol         | pentoxifylline  | 0.00 | 1 | 0.00 |
| Tongue  | hsa-miR-517b   | isoflupredone   | rimexolone      | 0.80 | 0 | 0.00 |
| Tongue  | hsa-miR-517b   | estradiol       | isoflupredone   | 0.68 | 0 | 0.00 |
| Tongue  | hsa-miR-517b   | etiocholanolone | rimexolone      | 0.66 | 0 | 0.00 |
| Tongue  | hsa-miR-517b   | estradiol       | rimexolone      | 0.62 | 0 | 0.00 |
| Tongue  | hsa-miR-517b   | trihexyphenidyl | carbachol       | 0.00 | 1 | 1.00 |
| Tongue  | hsa-miR-517b   | carbachol       | clomipramine    | 0.00 | 1 | 0.00 |
| Tongue  | hsa-miR-517b   | carbachol       | diphenhydramine | 0.00 | 1 | 0.00 |
| Tongue  | hsa-miR-517b   | carbachol       | estradiol       | 0.00 | 1 | 0.00 |
| Tongue  | hsa-miR-517b   | carbachol       | ethaverine      | 0.00 | 1 | 0.00 |
| Tongue  | hsa-miR-517b   | carbachol       | iloprost        | 0.00 | 1 | 0.00 |
| Tongue  | hsa-miR-517b   | carbachol       | tretinoin       | 0.00 | 1 | 0.00 |
| Tongue  | hsa-miR-517b   | clomipramine    | diphenhydramine | 0.00 | 1 | 0.00 |
| Tongue  | hsa-miR-517b   | clomipramine    | estradiol       | 0.00 | 1 | 0.00 |
| Tongue  | hsa-miR-517b   | clomipramine    | ethaverine      | 0.00 | 1 | 0.00 |
| Tongue  | hsa-miR-517b   | clomipramine    | iloprost        | 0.00 | 1 | 0.00 |
| Tongue  | hsa-miR-517b   | clomipramine    | tretinoin       | 0.00 | 1 | 0.00 |
| Tongue  | hsa-miR-517b   | clomipramine    | trihexyphenidyl | 0.00 | 1 | 0.00 |
| Tongue  | hsa-miR-517b   | diphenhydramine | estradiol       | 0.00 | 1 | 0.00 |
| Tongue  | hsa-miR-517b   | diphenhydramine | ethaverine      | 0.00 | 1 | 0.00 |
| Tongue  | hsa-miR-517b   | diphenhydramine | iloprost        | 0.00 | 1 | 0.00 |
| Tongue  | hsa-miR-517b   | diphenhydramine | tretinoin       | 0.00 | 1 | 0.00 |
| Tongue  | hsa-miR-517b   | diphenhydramine | trihexyphenidyl | 0.00 | 1 | 0.00 |
| Tongue  | hsa-miR-517b   | estradiol       | ethaverine      | 0.00 | 1 | 0.00 |
| Tongue  | hsa-miR-517b   | estradiol       | iloprost        | 0.00 | 1 | 0.00 |
| Tongue  | hsa-miR-517b   | estradiol       | tretinoin       | 0.00 | 1 | 0.00 |

|        |                 |                     |                   |      |   |      |
|--------|-----------------|---------------------|-------------------|------|---|------|
| Tongue | hsa-miR-517b    | estradiol           | trihexyphenidyl   | 0.00 | 1 | 0.00 |
| Tongue | hsa-miR-517b    | ethaverine          | iloprost          | 0.00 | 1 | 0.00 |
| Tongue | hsa-miR-517b    | ethaverine          | tretinoin         | 0.00 | 1 | 0.00 |
| Tongue | hsa-miR-517b    | ethaverine          | trihexyphenidyl   | 0.00 | 1 | 0.00 |
| Tongue | hsa-miR-517b    | iloprost            | tretinoin         | 0.00 | 1 | 0.00 |
| Tongue | hsa-miR-517b    | iloprost            | trihexyphenidyl   | 0.00 | 1 | 0.00 |
| Tongue | hsa-miR-517b    | tretinoin           | trihexyphenidyl   | 0.00 | 1 | 0.00 |
| Tongue | hsa-miR-526b*   | 3-acetamidocoumarin | scopoletin        | 0.61 | 0 | 0.00 |
| Tongue | hsa-miR-526b*   | iloprost            | tranexamic acid   | 0.00 | 0 | 0.50 |
| Tongue | hsa-miR-526b*   | acetazolamide       | amiodarone        | 0.00 | 1 | 0.00 |
| Tongue | hsa-miR-526b*   | acetazolamide       | iloprost          | 0.00 | 1 | 0.00 |
| Tongue | hsa-miR-526b*   | acetazolamide       | liothyronine      | 0.00 | 1 | 0.00 |
| Tongue | hsa-miR-526b*   | acetazolamide       | topiramate        | 0.00 | 1 | 0.00 |
| Tongue | hsa-miR-526b*   | acetazolamide       | trimethobenzamide | 0.00 | 1 | 0.00 |
| Tongue | hsa-miR-526b*   | amiodarone          | iloprost          | 0.00 | 1 | 0.00 |
| Tongue | hsa-miR-526b*   | amiodarone          | liothyronine      | 0.00 | 1 | 0.00 |
| Tongue | hsa-miR-526b*   | amiodarone          | topiramate        | 0.00 | 1 | 0.00 |
| Tongue | hsa-miR-526b*   | amiodarone          | trimethobenzamide | 0.00 | 1 | 0.00 |
| Tongue | hsa-miR-526b*   | iloprost            | liothyronine      | 0.00 | 1 | 0.00 |
| Tongue | hsa-miR-526b*   | iloprost            | topiramate        | 0.00 | 1 | 0.00 |
| Tongue | hsa-miR-526b*   | iloprost            | trimethobenzamide | 0.00 | 1 | 0.00 |
| Tongue | hsa-miR-526b*   | liothyronine        | topiramate        | 0.00 | 1 | 0.00 |
| Tongue | hsa-miR-526b*   | liothyronine        | trimethobenzamide | 0.00 | 1 | 0.00 |
| Tongue | hsa-miR-526b*   | topiramate          | trimethobenzamide | 0.00 | 1 | 0.00 |
| Tongue | hsa-miR-569     | carteolol           | sirolimus         | 0.00 | 1 | 0.00 |
| Uterus | hsa-miR-518a-5p | cephaeline          | emetine           | 0.97 | 0 | 0.00 |
| Uterus | hsa-miR-548m    | cephaeline          | emetine           | 0.97 | 0 | 0.00 |
| Uterus | hsa-miR-548m    | (-)-catechin        | naringenin        | 0.86 | 0 | 0.00 |
| Uterus | hsa-miR-548m    | cefamandole         | cefoperazone      | 0.67 | 0 | 1.00 |
| Uterus | hsa-miR-548m    | diphenylpyraline    | trazodone         | 0.00 | 0 | 1.00 |
| Uterus | hsa-miR-548m    | chlorzoxazone       | ranitidine        | 0.00 | 1 | 0.00 |
| Uterus | hsa-miR-548m    | chlorzoxazone       | topiramate        | 0.00 | 1 | 0.00 |
| Uterus | hsa-miR-548m    | chlorzoxazone       | trazodone         | 0.00 | 1 | 0.00 |
| Uterus | hsa-miR-548m    | ranitidine          | topiramate        | 0.00 | 1 | 0.00 |
| Uterus | hsa-miR-548m    | ranitidine          | trazodone         | 0.00 | 1 | 0.00 |
| Uterus | hsa-miR-548m    | topiramate          | trazodone         | 0.00 | 1 | 0.00 |

---
